# Foxp- and Skor-family proteins control differentiation of Purkinje cells from *Ptf1a* and *Neurogenin1*-expressing progenitors in zebrafish

Tsubasa Itoh, Mari Uehara, Shinnosuke Yura, Jui Chun Wang, Yukimi Fujii, Akiko Nakanishi, Takashi Shimizu, and Masahiko Hibi\*

Graduate School of Science, Nagoya University, Furo, Chikusa, Nagoya, Aichi 464-8602, Japan

\*Corresponding author: hibi.masahiko.s7@f.mail.nagoya-u.ac.jp

**Keywords:** *Ptf1a*, *Neurogenin1*, *Skor*, *Foxp*, Purkinje cells, zebrafish

## Summary statement

Foxp and Skor-family transcriptional regulators control the differentiation of Purkinje cells from neural progenitors expressing the proneural genes *ptf1a* and *neurogenin1*.

## ABSTRACT

Cerebellar neurons, such as GABAergic Purkinje cells (PCs), interneurons (INs), and glutamatergic granule cells (GCs) are differentiated from neural progenitors expressing proneural genes including *ptf1a*, *neurogenin1*, and *atoh1a/b/c*. Studies in mammals previously suggested that these genes determine cerebellar neuron cell fate. However, our studies on *ptf1a;neurogenin1* zebrafish mutants and lineage tracing of *ptf1a*-expressing progenitors have revealed that the *ptf1a;neurogenin1*-expressing progenitors can generate diverse cerebellar neurons including PCs, INs, and a part of GCs in zebrafish. The precise mechanisms of how each cerebellar neuron type is specified remains elusive. We found that genes encoding transcriptional regulators Foxp1b, Foxp4, Skor1b, and Skor2, which are reportedly expressed in PCs, were absent in *ptf1a;neurogenin1* mutants. *foxp1b;foxp4* mutants showed a strong reduction in PCs,

while *skor1b;skor2* mutants completely lacked PCs but instead displayed an increase in immature GCs. Misexpression of *skor2* in GC progenitors expressing *atoh1c* suppressed GC fate. These data indicate that *Foxp1b/4* and *Skor1b/2* function as key transcriptional regulators in the initial step of PC differentiation from *ptf1a/neurogenin1*-expressing neural progenitors, while *Skor1b* and *Skor2* control PC differentiation by suppressing their differentiation into GCs.

## INTRODUCTION

The structure of the cerebellum is conserved in most vertebrates. The cerebellum contains glutamatergic granule cells (GCs) and projection neurons, which are neurons in the deep cerebellar nuclei (DCNs) in mammals or eurydendroid cells (ECs) in teleosts, and GABAergic Purkinje cells (PCs) and interneurons (INs), which include Golgi and stellate cells in both mammals and teleosts, such as zebrafish (Hashimoto and Hibi, 2012; Hibi et al., 2017; Hibi and Shimizu, 2012).

Previous studies in mice revealed that these cerebellar neurons are derived from neural progenitors that express the proneural genes *atoh1* or *ptf1a* (these genes in mice are described as *Atoh1* and *Ptf1a*, but in this study *atoh1* and *ptf1a* will be used for a comparison between animals) (Ben-Arie et al., 1997; Machold and Fishell, 2005; Wang et al., 2005; Wingate, 2005) (Fig. 1A). The *atoh1*-expressing (*atoh1*<sup>+</sup>) neural progenitors are located in the upper rhombic lip (URL, also called the cerebellar rhombic lip) and give rise to projection neurons in DCNs and GCs in the cerebellum (Ben-Arie et al., 1997; Machold and Fishell, 2005; Wang et al., 2005; Wingate, 2005). On the other hand, the *ptf1a*-expressing (*ptf1a*<sup>+</sup>) neural progenitors are located in the ventricular zone (VZ) and give rise to PCs and INs (Hoshino, 2012; Hoshino et al., 2005). In addition to *ptf1a*, proneural genes *Neurogenin1* (*neurog1*) and *Ascl1* are expressed in the VZ of the cerebellum and these proneural gene-expressing neural progenitors were shown to give rise to PCs and INs (Lundell et al., 2009; Sudarov et al., 2011). Expression of *atoh1* (*atoh1a/b/c*) and *ptf1a* genes in the URL and VZ of the cerebellum was also reported for zebrafish (Adolf et al., 2004; Chaplin et al., 2010; Kani et al., 2010; Koster and Fraser, 2001; Volkmann et al., 2008), suggesting similar or

identical mechanisms by which proneural genes control the differentiation of cerebellar neurons. However, lineage tracing in zebrafish indicated that at least a portion of ECs may be derived from *ptfla*<sup>+</sup>, suggesting that a slightly different mechanism between mammals and zebrafish may be involved in the differentiation of projection neurons (Kani et al., 2010).

Studies of mouse and zebrafish *atoh1* genes revealed that they are required for the differentiation of GCs (Ben-Arie et al., 1997; Kidwell et al., 2018). Similarly, a mouse *ptfla* mutant completely lacked PCs and INs (Hoshino et al., 2005) and the zebrafish *ptfla* mutant showed a reduction – but not loss – of PCs (Itoh et al., 2020), indicating the requirement of *ptfla* in PC development. The VZ progenitor cells were shown to generate GCs in *ptfla* mutant mice (Pascual et al., 2007). Ectopic expression of *atoh1* or *ptfla* in VZ or URL resulted in the generation of glutamatergic and GABAergic neurons, respectively (Yamada et al., 2014), suggesting that expression of *atoh1* and *ptfla* is sufficient to determine fate of these cell populations. However, it is still not clear whether these proneural genes irreversibly determined the fate of cells in the cerebellum. In the hindbrain region caudal to the cerebellum, the *ptfla*<sup>+</sup> progenitors give rise to inhibitory neurons in the cochlear nuclei in mice (Fujiyama et al., 2009), excitatory neurons in the inferior olivary nuclei (IO neurons) in both mice and zebrafish (Itoh et al., 2020; Yamada et al., 2007), and crest cells in zebrafish (Itoh et al., 2020), indicating that the *ptfla*<sup>+</sup> progenitors have the potential to generate neurons other than GABAergic PCs or INs. It was previously shown that the homeodomain transcription factor *Gsx2* is involved in fate determination of IO neurons (Itoh et al., 2020). It remains elusive what factors are involved in the differentiation of PCs from the *ptfla*<sup>+</sup> progenitors in the cerebellum.

Several transcription factors have been shown to be involved in the differentiation of PCs. Forkhead transcription factors *Foxp2* and *Foxp4* are expressed in PCs in the mouse cerebellum (Ferland et al., 2003; Tam et al., 2011; Tanabe et al., 2012). In the *Foxp2* mutant in mice, even though the specification of PC took place, positioning and dendrite formation of PCs were affected (Shu et al., 2005). siRNA-mediated knockdown of *Foxp4* at a late developmental period resulted in the impairment of PC dendrite formation (Tam et al., 2011). These findings suggest that

Foxp-family transcription factors regulate late processes of PC differentiation but are not involved in early differentiation processes. Ski/Sno-family transcriptional co-repressor 2 (*Skor2*, also known as *Corl2*) was shown to be expressed in PCs and plays an important role in the differentiation of PCs (Nakatani et al., 2014; Wang et al., 2011). *Skor2* mutant mice exhibited developmental defects in PC development with impaired dendrite arborization, decreased expression of PC marker genes, and increased expression of glutamatergic neuronal genes instead. However, *Skor2* was found to be dispensable for the specification and maintenance of PC fate (Nakatani et al., 2014; Wang et al., 2011). In addition to *Skor2*, *Skor1* is expressed in PCs but its role in PC differentiation remains elusive (Nakatani et al., 2014). Although these transcriptional regulators are involved in some aspects of PC differentiation, it is unclear whether these genes function downstream of *Ptf1a* and *Neurog1*. It is also not clear whether they control initial specification of PCs.

Previous RNA-seq analysis of zebrafish cerebellar neurons revealed that *foxp1b/4* and *skor1b/2* are expressed in developing PCs in the zebrafish cerebellum (Takeuchi et al., 2017). In this study, we show that *ptf1a*<sup>+</sup> neural progenitors are capable of generating not only PCs but also INs, ECs, and PCs, and that *Foxp1b4* and *Skor1b/2* function downstream of *Ptf1a* and *Neurog1* to control differentiation from *Ptf1a/Neurog1*-expressing neural progenitors into PCs.

## RESULTS

### ***Ptf1a* and *Neurog1* are co-expressed in cerebellar VZ progenitors**

*ptf1a* is expressed in the cerebellar VZ and involved in the generation of PCs in mice and zebrafish (Hoshino et al., 2005; Kani et al., 2010). PCs are absent in mouse *ptf1a* mutants while PCs are reduced, but not absent, in zebrafish *ptf1a* mutants (Itoh et al., 2020). Lineage tracing in mice suggested that *neurog1* is expressed in the progenitors of PCs in mice (Lundell et al., 2009). Therefore, *neurog1* is a candidate that compensates for the loss of *ptf1a*. We compared the expression of *ptf1a* and *neurog1* by *in situ* hybridization and by using transgenic lines expressing fluorescent proteins (Fig. 1). As reported previously, *ptf1a* transcripts were detected in the cerebellar VZ in early-stage



larvae (3 day-post-fertilization [dpf] larvae, Fig. 1B, C), whereas *neurog1* transcripts were barely detected in the cerebellum region (Fig. 1D, E). However, the promoter and enhancer activity of *neurog1* was detected in the cerebellar VZ of *TgBAC(neurog1:EGFP)* (hereafter, named *neurog1:EGFP*) larvae (Fig. 1H, K). We compared *neurog1:GFP*-expressing cells with *ptfla*-expressing (*ptfla*<sup>+</sup>) cells that were marked by using the Gal4-UAS system with *TgBAC(ptfla:GAL4-VP16)* and *Tg(UAS:RFP)* (referred to as *ptfla::RFP*) (Fig. 1G, J). *ptfla::RFP* was detected in the VZ progenitor cells, in the same way that *ptfla*<sup>+</sup> cells were labeled with *Tg(ptfla:GFP)* (Fig. S1). We found that some *ptfla::RFP*-expressing cells also expressed *neurog1:EGFP* (Fig. 1F, I), suggesting that at least part of the *ptfla*<sup>+</sup> neural progenitors also express *neurog1* in the cerebellar VZ.

### **Ptfla and Neurog1 cooperate to generate various cerebellar neurons**

To reveal the roles of *ptfla* and *neurog1* in cerebellar neurogenesis, we generated combined mutants of *ptfla*<sup>A4</sup> and *neurog1*<sup>hi1059Tg</sup> (referred to as *neurog1*) alleles (Fig. 2, 3) (Golling et al., 2002; Itoh et al., 2020) and analyzed their phenotypes by marker expression. Whereas *neurog1* mutant larvae had comparable numbers of PCs and INs, which were marked by parvalbumin7 (Pvalb7) and Pax2, compared to wild-type (WT) larvae, *ptfla* mutants showed a significant reduction in PCs and INs (Fig. 2A-C, E-G, AG, AH, Table 1). The *neurog1* mutation enhanced *ptfla* mutant phenotypes and *ptfla;neurog1* double mutant larvae showed an almost complete lack of PCs and INs (Fig. 2D, H, AG, AH). Consistent with this, *ptfla* mutants showed a reduced expression of genes that are reportedly expressed in zebrafish PCs (Takeuchi et al., 2017), including *foxp1b/4*, *skor1b/2*, *lhx1a*, and *rorb*. *ptfla;neurog1* mutants displayed lack of expression of these PC genes (Fig. 2I-AF). A similar reduction and loss of crest cells in the anterior hindbrain, which receive GC axons and function in the cerebellum-like structure (Hibi and Shimizu, 2012), was observed in *ptfla* and *ptfla;neurog1* mutants, respectively (Fig. S2). These data indicate that *ptfla* plays a major role in the development of PCs and INs in the cerebellum and crest cells of the rostral hindbrain, but that *neurog1* is not essential for this development, although it has some redundant functions that overlap with those of *ptfla*.

In addition to the PC and IN markers, the expression of *olig2* and *vglut2a* (*slc17a6b*), which were expressed in ECs (Bae et al., 2009; Kani et al., 2010; McFarland et al., 2008), decreased in the *ptf1a* mutant cerebellum, and further decreased in the *ptf1a;neurog1* mutant cerebellum (Fig. 3A-H). Furthermore, the expression of *atoh1a*, *atoh1b*, and *atoh1c*, which were expressed in the GC progenitors (Chaplin et al., 2010; Kani et al., 2010; Kidwell et al., 2018), was not affected at 3 dpf (Fig. S3) but was reduced at 5 dpf in *ptf1a;neurog1* mutant larvae (Fig. 3I-T). *ptf1a;neurog1* mutant larvae had a variable number of cells expressing GC markers Neurod1 and Vglut1 (*Slc17a7a*) at 5 dpf (Fig. 3X, AB). These data indicate that Ptf1a and Neurog1 are not absolutely essential for the development of glutamatergic ECs and GCs, but are at least partly involved in their development.

### **Ptf1a-expressing neural progenitors give rise to a variety of cerebellar neurons**

We next traced the *ptf1a*<sup>+</sup> cell lineage (Fig. 4, 5). We expressed mCherry and CreERT2 in *ptf1a*<sup>+</sup> cells by using the Gal4-UAS system with *TgBAC(ptf1a:GAL4-VP16)* and *Tg(UAS-hsp70l:mCherry-T2A-CreERT2)* lines (referred to as *ptf1a::mCherry-T2A-CreERT2*). To validate the expression of mCherry and CreERT2 in *ptf1a*<sup>+</sup> cells, we generated *ptf1a*<sup>Tg(hsp70l-EGFP)</sup> line by knocking in the EGFP expression cassette at *ptf1a* gene locus. EGFP expression in *ptf1a*<sup>Tg(hsp70l-EGFP)</sup> line recapitulated *ptf1a* expression (Fig. S4). In the cerebellum, cells expressing mCherry in *ptf1a::mCherry-T2A-CreERT2* line overlapped with those expressing EGFP in *ptf1a*<sup>Tg(hsp70l-EGFP)</sup> line and coincided with *CreERT2* mRNA-expressing cells (Fig. S4), confirming the expression of CreERT2 in *ptf1a*<sup>+</sup> cells. A reporter line *TgBAC(gad1b:LOXP-DsRed-LOXP-GFP)* (Satou et al., 2013) was used to trace GABAergic neurons. In this experiment, when CreERT2 was expressed in *ptf1a*<sup>+</sup> cells and activated with endoxifen, CreERT2 induced recombination of the reporter gene, resulting in the conversion from DsRed to GFP expression in GABAergic neurons. GFP-expressing (GFP<sup>+</sup>) cells are GABAergic neurons derived from *ptf1a*<sup>+</sup> neural progenitors. In the absence of CreERT2 expression, only a small number of GFP<sup>+</sup> cells was observed (Fig. 4A-F, S), whereas a significant number of GFP<sup>+</sup> cells was observed in the cerebellum in the presence of *ptf1a::mCherry-T2A-CreERT2* (Fig. 4I, L).

Endoxifen treatment increased the number of GFP<sup>+</sup> cells (Fig. 4O, R, S). The likely reason for the expression of GFP in the absence of endoxifen treatment is due to the strong expression of CreERT2 and leakiness of the reporter. The increase in GFP<sup>+</sup> cells by endoxifen at 2 dpf, when the expression domains of *ptf1a* and *atoh1a* are completely separated from each other in the cerebellum (Kani et al., 2010), indicates that most if not all GFP<sup>+</sup> cells are derived from neural progenitors expressing *ptf1a* but not *atoh1* at 2 dpf. There were two types of GFP<sup>+</sup> cells: Pvalb7-expressing (Pvalb7<sup>+</sup>) and Pvalb7-negative (Pvalb7<sup>-</sup>) cells (Fig. 4P-R), which correspond to PCs and INs, respectively. Both GFP<sup>+</sup> Pvalb7<sup>+</sup> and GFP<sup>+</sup> Pvalb7<sup>-</sup> cells in 5 dpf larvae harboring CreERT2 and the reporter were increased by endoxifen treatment (Fig. 4T, U), indicating that the increased PCs and INs were derived from *ptf1a*<sup>+</sup> neural progenitors at 2 dpf.

We further examined the GC lineage derived from *ptf1a*<sup>+</sup> neural progenitors by using a reporter line *Tg(cbln12:LOXP-TagCFP-LOXP-Kaede)* (Fig. 5C), which expresses TagCFP in GCs in a *cbln12* promoter-dependent manner (Dohaku et al., 2019). In this experiment, the expression and activation of CreERT2 induced recombination of the reporter gene, resulting in a conversion from TagCFP to Kaede expression in GCs. Kaede-expressing (Kaede<sup>+</sup>) cells are GCs derived from *ptf1a*<sup>+</sup> neural progenitors. Kaede was barely detected in larvae with only the reporter gene (Fig. 5B, E), and in larvae with both CreERT2 and reporter genes but no endoxifen treatment (Fig. 5I), indicating that this reporter had very low leakiness. Endoxifen treatment at 2 dpf resulted in the appearance of Kaede<sup>+</sup> cells that extended typical parallel fibers (Fig. 5M, Q). These data indicate that a portion of GCs in the cerebellum was derived from *ptf1a*<sup>+</sup> neural progenitors in zebrafish. Considering the data for both *ptf1a* and *neurog1* mutants, Ptf1a/Neurog1-expressing neural progenitors are capable of generating a variety of cerebellar neurons.

### **Foxp1b/4 and Skor1b/2 function downstream of Ptf1a and Neurog1 in differentiating PCs**

There should be regulators that control the specification and/or differentiation of PCs from Ptf1a/Neurog1-expressing neural progenitors. We previously identified genes that

were preferentially expressed in larval PCs (Takeuchi et al., 2017). Among them, we focused on genes encoding transcriptional regulators. *foxp*-family *foxp1b*, *foxp4* and *skor*-family *skor1b* and *skor2* were expressed in the cerebellum from 2 dpf (Fig. S5). These genes were expressed in PCs in 5 dpf WT larvae but were absent in *ptfla;neurog1* double mutant larvae (Fig. 2L, P, T, X), suggesting that these genes function downstream of Ptf1a and Neurog1. We generated antibodies against Foxp1b, Skor1b, and Skor2 and used them to analyze their expression by co-immunostaining with anti-Pvalb7 antibody. Foxp1b was detected in the nucleus of Pvalb7<sup>+</sup> PCs as well as in Pvalb7<sup>-</sup> cells in the cerebellum of WT larvae (Fig. 6A-F), but was not observed in the cerebellum of *foxp1b* mutant larvae (Fig. 6G-L) (the *foxp1b* mutant is described below). Foxp1b was also detected in the nucleus of PCs in the WT adult cerebellum, but not in the *foxp1b* mutant cerebellum (Fig. 6O, R). Both Skor1b and Skor2 were detected in the nucleus of Pvalb7<sup>+</sup> PCs and Pvalb7<sup>-</sup> cells in the larval but not adult cerebellum (Fig. 6S-X, AE-AJ), but were not observed in *skor1b* and *skor2* mutant larvae (Fig. 6Y-AD, AK-AP) (*skor1b* and *skor2* mutants are described below). Although the possibility that Foxp1b, Skor1b and Skor2 are expressed in non-PC lineage cells of the cerebellum cannot be completely excluded, the data suggest that these proteins are expressed in PC lineage cells before PCs become fully differentiated.

### **Foxp1b/4 and Skor1b/2 are required for the differentiation of PCs**

We generated mutants of *foxp1b/4* and *skor1b/2* using the CRISPR/Cas9 method (Fig. S6). The *foxp1b* and *foxp4* mutants harbor 26- and 7-bp deletions in exon 14 of *foxp1b* and exon 7 of *foxp4*, respectively, that introduce a premature stop codon. The putative mutant Foxp1b and Foxp4 proteins lacked the DNA-binding forkhead domain. The *skor1b* and *skor2* mutants harbor 10- and 8-bp deletions in exon 1 of *skor1b* and exon 2 of *skor2*, respectively, that introduce a premature stop codon. Although the functional domains of Skor proteins were not well understood, the putative mutant Skor1b and Skor2 proteins lacked the protein from the c-Ski SMAD binding domain to the carboxy-terminus. The mutations in *foxp1b* and *foxp4* did not alter the expression of either gene, and similarly the mutations in *skor1b* and *skor2* did not influence the

expression of either gene at 5 dpf (Fig. S7). This suggests that these mutations did not induce nonsense-mediated RNA decay or compensatory gene expression.

Single mutant larvae of *foxp1b* or *foxp4* showed a slight reduction in the expression of Pvalb7, ZebrinII (encoded by *aldolase Ca* gene), carboxy anhydrase 8 (Ca8), or *rorb* in the cerebellum (Fig. 7A-C, E-G, I-K, U-W). The *foxp1b;foxp4* double mutant displayed a more severe reduction in these PC markers (Fig. 7D, H, L, X). After counting the number of Pvalb7<sup>+</sup> PCs in the mutants, it was confirmed that PCs were slightly reduced in *foxp1b* and *foxp4* single mutants compared to WT, but were more severely reduced in *foxp1b;foxp4* double mutants (Fig. 7AO). Reduction of Pvalb7<sup>+</sup> PCs was also observed in *foxp1b;foxp4* double crispants (F0 larvae), which have insertion/deletion (indel) mutations in target DNA different from the stable mutants described above (Fig. S8). In contrast to the PC markers, expression of the GC marker Neurod1, the EC markers *olig2* and *vglut2a*, and the IN marker *pax2a* was not affected in either single or double mutants (Fig. 7M-P, Fig. S9, Table 2). The expression of Vglut1 was altered in *foxp1b;foxp4* mutants; however, this is due to a significant reduction in PCs in these mutants, leading to abnormalities in GC axonal trajectory, and the size of the Vglut1 expression domain remains unchanged (Fig. 7Q, T, Table 2). These data suggest that Foxp1b and Foxp4 function partially redundantly in PC differentiation; Foxp1b and Foxp4 are required for the proper differentiation of PCs but not GCs, ECs, or INs, in the cerebellum.

Single mutant *skor1b* and *skor2* larvae did not show reduced expression of the PC markers compared to WT larvae (Fig. 8A-C, E-G, I-K, Q-S, AK), whereas *skor1b;skor2* double mutant larvae showed a complete loss of expression of the PC markers (Pvalb7, Zeb II, Ca8, *rorb*, Fig. 8D, H, L, T, AK). Similarly, a strong reduction or loss of Pvalb7<sup>+</sup> PCs was observed in *skor1b;skor2* crispants, which have indel mutations in target DNA different from the stable mutants (Fig. S10). The expression of the GC axon marker Vglut1 was altered in *skor1b;skor2* mutants. This change is likely attributable to the absence of PCs in these mutants, leading to abnormalities in the GC axonal trajectory. The size of the Vglut1 expression domain remained unaffected in these mutants (Fig. 8P, Table 3). The expression of EC markers *olig2* and *vglut2a* and IN marker *pax2a* was not affected in either *skor1b*, *skor2* single

or *skor1b;skor2* double mutants (Fig. S9, Table 3). These data indicate that *Skor1b* and *Skor2* function redundantly and are essential for the differentiation of PCs, but not ECs or INs, in the cerebellum.

Although *foxp1b;foxp4* and *skor1b;skor2* mutant larvae showed defects in PC development, expression of *skor1b* and *skor2* was not affected in *foxp1b;foxp4* mutant larvae (Fig. 7Y-AF, Table 2). The expression domains of *foxp1b* and *foxp4* in *skor1b;skor2* double mutant larvae were altered by aberrant differentiation of cerebellar neurons, as described below. In *skor1b;skor2* mutants, the expression of *foxp1b* was strongly reduced, while the expression level of *foxp4* expression remained relatively unaffected. However, *foxp4* was ectopically observed in the rostral part of the cerebellum (Fig. 8X, AB, Table 3). These data suggest that *skor1b/2* expression is regulated independently of *foxp1b/4*, while *foxp1b/4* expression is partly or indirectly regulated by *skor1b/2* in the cerebellum. We further examined *ptf1a* expression in these mutants. *ptf1a* expression was not affected in *foxp1b;foxp4* mutants and *skor1b;skor2* mutants (Fig. 7AG-AN, 8AC-AJ, Table 2, 3). These data suggest that *foxp1b/4* and *skor1b/2* regulate cerebellar neurogenesis independently of *ptf1a* expression.

### **Skor1b and Skor2 suppress GC fate**

We further examined the expression of GC markers in *skor1b;skor2* mutant larvae at 5 dpf in more detail. WT, *skor1b* or *skor2* single mutant larvae had regions of the cerebellum where *Neurod1* expression was absent (Fig. 9A-C, E-G), whereas *skor1b;skor2* mutant larvae did not (Fig. 9D, H). Consistent with this finding, the area of the cerebellum containing *Neurod1*<sup>+</sup> GCs was significantly larger in *skor1b;skor2* mutant larvae (Fig. 9Q), indicating that immature (*Neurod1*<sup>+</sup>) GCs increased in the *skor1b;skor2* mutant cerebellum. Cell proliferation, indicated by phospho-histone 3, did not increase in the *skor1b;skor2* mutant cerebellum (Fig. S11), indicating that increased GCs were not due to an increase in the proliferation of GCs. These data suggest that cells in early-stage larvae of *skor1b;skor2* mutants that should have differentiated into PCs instead differentiated into *Neurod1*<sup>+</sup> immature GCs. We further examined the expression of *cbln12* and *vglut1*, which were reported to be expressed in mature GCs (Bae et al., 2009; Kani et al., 2010; Takeuchi et al., 2017), noting that they did not

increase at 5 dpf in *skor1b;skor2* mutant larvae (Fig. 9L, P), suggesting that despite an increase in immature GCs, they did not differentiate into mature GCs. The increase of GCs was no longer evident ectopic at 7 dpf (Fig. 9R, S12). To examine the ability of Skor to suppress GC differentiation, biotin ligase (BirA, as control) or Skor2 together with mCherry, were expressed in GC progenitors in a mosaic manner using *Tg(ato1c:GAL4FF)* line, which expresses a GAL4-VP16 variant in the GC progenitors (Kidwell et al., 2018) (Fig. 9S). The expression of Pvalb7 or Neurod1 cells in *ato1c*<sup>+</sup>-lineage cells expressing transgenes was also examined. When BirA and mCherry was expressed, around 60% of cells were Neurod1<sup>+</sup> cells (Neurod1<sup>-</sup> cells are likely undifferentiated GCs, Fig. 9W-Y, AF). In contrast, when Skor2 and mCherry were co-expressed in *ato1c*<sup>+</sup> progenitors, the ratio of the Neurod1<sup>+</sup> population was significantly reduced (Fig. 9AC-AF). No Pvalb7<sup>+</sup> cells expressed RFP or Skor2/mCherry (Fig. 9T-V, Z-AB). These data indicate that Skor2 can inhibit the differentiation of *ato1c*<sup>+</sup> GC progenitors to Neurod1<sup>+</sup> GCs, but Skor2 alone cannot induce the differentiation of *ato1c*<sup>+</sup> cells to PCs.

## DISCUSSION

### Roles of Ptf1a and Neurog1 in the development of cerebellar neural circuits

Whereas *ptf1a* mutant mice showed a complete loss of GABAergic PCs and INs (Hoshino et al., 2005), *ptf1a* mutant zebrafish showed a partial loss of PCs and INs (Itoh et al., 2020) (Fig. 2), suggesting that the contribution of Ptf1a to the development of PCs and INs differs slightly between mice and zebrafish. Both *ptf1a* and *neurog1* are expressed in the cerebellar VZ in mice and zebrafish (Kani et al., 2010; Lundell et al., 2009) (Fig. 1). Zebrafish *ptf1a;neurog1* mutants displayed an almost complete lack of PCs and INs (Fig. 2, Table 1). These data suggest that Ptf1a plays a major role in the development of PCs and INs in zebrafish, whereas Neurog1 functions partially redundantly with Ptf1a in this process. A similar cooperation was observed in the development of crest cells, which were reduced in *ptf1a* mutants and almost absent in *ptf1a;neurog1* mutants (Fig. S2). We previously reported that Ptf1a is essential for the development of IOs in the hindbrain of zebrafish (Itoh et al., 2020). A different



dependency of *Ptf1a* may be explained by overlapping and non-overlapping expression of *ptf1a* and *neurog1* in the rostral (for PC and crest cells) and caudal hindbrain (for IOs) (Fig. 1), as was reported for mice (Yamada et al., 2007). Lineage tracing revealed that PCs and INs are derived from *ptf1a*<sup>+</sup> neural progenitors (Fig. 4). When considered together, our findings suggest that both PCs and INs in the cerebellum and crest cells in the rostral hindbrain are derived from *Ptf1a*/*Neurog1*-expressing neural progenitors in zebrafish.

In addition to PCs and INs, *ptf1a;neurog1* mutants showed reduced expression of *olig2* and *vglut2a* (Fig. 3), which were expressed in ECs in zebrafish cerebellum (Bae et al., 2009; McFarland et al., 2008). Our previous study suggested that *olig2*-expressing ECs were mainly derived from *ptf1a*<sup>+</sup> neural progenitors, but some were derived from *atoh1a*<sup>+</sup> neural progenitors (Kani et al., 2010). Although further lineage tracing of *ptf1a*<sup>+</sup> neural progenitors for ECs is required, the data further support that at least some ECs are derived from *Ptf1a*/*Neurog1*-expressing neural progenitors. Furthermore, in *ptf1a;neurog1* mutants, the expression of *atoh1a/b/c* was unaffected at 3 dpf (Fig. S3) but was strongly reduced at 5 dpf (Fig. 3), suggesting that *Ptf1a* and *Neurog1* play a role in maintenance of GC progenitors. It is unclear whether *Ptf1a* and *Neurog1* cell-autonomously or non-cell autonomously maintain GC progenitors. While in mammals GC progenitors are maintained by *Shh* produced by PCs (Corrales et al., 2006; Lewis et al., 2004; Wallace, 1999; Wechsler-Reya and Scott, 1999), *shh* is not expressed in PCs and *Shh* signaling is not activated in the zebrafish cerebellum (Biechl et al., 2016; Chaplin et al., 2010; Hibi et al., 2017). Lineage tracing indicates that at least some GCs were derived from *ptf1a*<sup>+</sup> neural progenitors (Fig. 5). Thus, while not ruling out non-cell autonomous function, *Ptf1a* and *Neurog1* likely have a cell-autonomous role in the differentiation of some GCs.

### **Does *Ptf1a* determine GABAergic neural fate?**

Loss of function of *ptf1a* and gain of function of *ptf1a* and *atoh1* in mice suggest that *Ptf1a* and *Atoh1* have deterministic roles in the development of GABAergic and glutamatergic neurons, respectively (Hoshino et al., 2005; Pascual et al., 2007; Yamada et al., 2014). However, we found that in zebrafish, *ptf1a*<sup>+</sup> progenitor cells gave rise to

GABAergic PCs, INs, and GCs (Fig. 4, 5, S1). It is possible that *ptfla* and *atoh1* genes are initially co-expressed in the same neural progenitors in the cerebellum, and these cerebellar neurons are derived from the *ptfla*<sup>+</sup> *atoh1*<sup>+</sup> progenitors. However, PCs, INs, and GCs marked in the lineage tracing experiments were derived from neural progenitors expressing *ptfla* at 2 dpf (Fig. 4, 5) when the expression regions of *atoh1* genes and *ptfla* were well separated (Kani et al., 2010). Therefore, at least some of these neurons could be derived from neural progenitors expressing *ptfla* but not *atoh1* genes. *ptfla;neurog1* mutants showed an almost complete lack of PCs and INs, but retained GCs at 5 dpf (Fig. 2, 3). Considering that GCs were reported to be mainly derived from *atoh1*<sup>+</sup> neural progenitors in early-stage larvae (Kani et al., 2010; Kidwell et al., 2018), GCs derived from *ptfla*<sup>+</sup> neural progenitors are likely to be a minority among GCs. However, our findings indicate that glutamatergic neurons' GCs and possibly ECs can be generated from *ptfla*<sup>+</sup> neural progenitors, even if in small numbers, in the zebrafish cerebellum.

The data also imply that *ptfla* expression alone is not sufficient to determine GABAergic neuron fate in the zebrafish cerebellum. How do these zebrafish results align with mouse studies? One possibility is that the regulation of downstream genes that determine cell fates by proneural genes is tight in mice, whereas it is more flexible in zebrafish. The expression of GC deterministic genes, such as *neurod1* (Miyata et al., 1999), may be strictly regulated by Atoh1 in mice, but can be regulated by both Atoh1a/b/c and Ptf1a (and Neurog1) in zebrafish. Further analysis is required to understand how proneural genes control the cell fate determination.

### **Role of Foxp- and Skor-family transcriptional regulators in PC differentiation**

Since *ptfla*<sup>+</sup> neural progenitors are capable of generating multiple types of cerebellar neurons, there should be factors that determine the cell fate of each type of neuron. We showed that Foxp- and Skor-family transcriptional regulators are expressed in PCs, dependent on Ptf1a and Neurog1 (Fig. 2). The *foxp1b;foxp4* mutant showed a strong reduction of PCs (Fig. 7), and *skor1b;skor2* mutants showed the complete loss of PCs (Fig. 8). Furthermore, Foxp1b, Skor1b, and Skor2 were expressed in differentiating and differentiated PCs (Fig. 6). These data indicate that Foxp1b/4 and Skor1b/2 function

downstream of *Ptf1a* and *Neurog1* as key transcriptional regulators during the initial step of PC differentiation. *skor1b* and *skor2* expression was not affected in *foxp1b;foxp4* mutants (Fig. 7). Although the expression region of *foxp1b* and *foxp4* was affected in *skor1b/skor2* mutants, this may be due to the aberrant differentiation of cerebellar neurons (Fig. 8). Our data suggest that Foxp- and Skor-family proteins function independently to control PC differentiation (Fig. 10).

Studies of *Foxp2*-mutant mice and siRNA-mediated knockdown of *Foxp4* in mice revealed that Foxp2 and Foxp4 function in late developmental processes such as cell positioning and dendrite formation (Ferland et al., 2003; Tam et al., 2011; Tanabe et al., 2012). In zebrafish, *foxp1b* and *foxp4* are strongly expressed in PCs while *foxp1a* and *foxp2* are only slightly expressed in PCs (Takeuchi et al., 2017). Thus, zebrafish *foxp1b* may serve the same function as mouse *foxp2*. Although *foxp1b;foxp4* showed a strong reduction of PCs, some PCs remained (Fig. 7). It is possible that the function of *foxp1a* or *foxp2* is partially redundant with that of *foxp1b* and *foxp4* in PC differentiation. Triple or quadruple zebrafish mutants of *foxp*-family genes should answer this question. *foxp2* is also expressed in IOs in both mice and zebrafish (Fujita and Sugihara, 2012; Itoh et al., 2020). Foxp-family proteins may coordinate differentiation from *ptf1a*<sup>+</sup> neural progenitors to both PCs and IOs that form the cerebellar neural circuits. It remains elusive whether Foxp proteins function as transcriptional activators or repressors. Previous studies indicated that Foxp1/2/4 can interact with a component of the NuRD remodeling complex, functioning as transcriptional repressors (Chokas et al., 2010). No increased or ectopic expression of GC genes was observed in the cerebellum of *foxp1b;foxp4* mutants, unlike *skor1b;skor2* mutants (Fig. 7). Further analysis is required to understand the molecular mechanisms of Foxp protein-mediated PC differentiation. Foxp1 is involved in many developmental processes, including specification of motor neuron subtypes in the spinal cord (Dasen et al., 2008; Surmeli et al., 2011). There might be general mechanisms by which Foxp-family proteins control specification from neural progenitors to specific types of neurons.

### Mechanisms of Skor1b- and Skor2-mediated control of PC differentiation

Previous studies on the *skor2* mutant suggested that Skor2 is involved in relatively late development of PCs and the suppression of glutamatergic neuronal genes, but it is dispensable for the initial fate specification of PCs (Nakatani et al., 2014; Wang et al., 2011). We demonstrated that *skor1b;skor2* mutants displayed a complete loss of PCs and instead increase the amount of Neurod1<sup>+</sup> immature GCs (Fig. 8, 9). Cell proliferation linked to GC proliferation did not increase in *skor1b;skor2* mutants (Fig. S11). Ectopic expression of *skor2* in GC progenitors reduced the expression of Neurod1 (Fig. 9). These data suggest that in *skor1b;skor2* mutants, cells destined to become PCs differentiated into Neurod1<sup>+</sup> GCs. Therefore, Skor1b/2 function in the initial step of differentiation from *ptfla*<sup>+</sup> neural progenitors to suppress differentiation to GCs (Fig. 10). Although Neurod1<sup>+</sup> GCs increased in *skor1b;skor2* mutants, expression of mature GC markers did not increase in these mutants (Fig. 8, 9), indicating that other factors, which possibly function downstream of Atoh1, are required for differentiation of the Neurod1<sup>+</sup> immature GCs to mature GCs. Although GCs increased in *skor1b;skor2* mutants at 5 dpf, the increase was not evident at 7 dpf (Fig. 9R, S12). GCs derived from *ptfla*<sup>+</sup> neural progenitors might die. In *ptfla;neurog1* mutants, while the expression of *skor1b* and *skor2* was absent, we did not observe an increase in *atoh1*<sup>+</sup> GC progenitors or Neurod1<sup>+</sup> GCs; instead, there was a decrease (Fig. 3, Table 1). This finding is in contrast with the excess GCs in the *skor1b;skor2* mutants (Fig. 9, Table 3). However, this may be due to the absence of *ptfla*<sup>+</sup> neural progenitors, which give rise to excess GCs.

It remains elusive whether Skor1b/2 suppress GC fate and thereby secondarily promote PC differentiation, or whether they are also directly involved in PC differentiation independent of GC fate suppression. Mouse Skor2 exhibited transcriptional repression of a reporter in cultured cells (Wang et al., 2011), suggesting that Skor2 directly represses target genes. Since the direct binding of Skor family proteins to DNA has not been reported, it is likely that the regulation of gene expression requires transcription factor partners that bind to specific elements of DNA. We screened Skor1b/2 interactors by examining co-immunoprecipitation of Skor1/2 with PC-expressing transcription factors from transfected HEK293T cells and found that zebrafish Skor1b and Skor2 can interact with Lhx-family Lhx1a, Lhx1b, and Lhx5

(there are two genes for Lhx1 in zebrafish, Fig. S13). *lhx1a* and *lhx1b* were expressed in the cerebellum of early-stage larvae (Fig. S5). We generated zebrafish crispants and stable mutants of *lhx1a*, *lhx1b*, and *lhx5* (Fig. S14, S15, S16). Similar to *lhx1;lhx5* mutant mice (Zhao et al., 2007), we found that *lhx1a;lhx5* zebrafish crispants/mutants showed a severe reduction of PCs and *lhx1a;lhx1b;lhx5* zebrafish crispants/mutants showed a more pronounced reduction or complete loss of PCs (Fig. S15, S16, Table S1), as did *skor1b;skor2* mutants. Although Lhx proteins are thought to function as transcriptional activators (Hobert and Westphal, 2000), they may also function with Skor proteins as repressors to repress the expression of GC genes. Alternatively, Skor1b/2 cooperate with Lhx-family proteins to positively promote the expression of some PC genes. The identification of target genes of Skor1b/2 and Lhx1a/1b/5 by chromatin immunoprecipitation (ChIP) should clarify this issue. In any case, Skor- and Lhx-family transcriptional regulators might cooperate to induce PC differentiation and/or suppress GC fate (Fig. 10).

### Gene networks for PC differentiation

In this study, we demonstrate that there are two steps to determine whether cells become PCs or GCs in the cerebellum. In the first step, expression of proneural genes roughly determine cell fate: expression of *atoh1* induces differentiation into GCs while *ptf1a* expression induces the differentiation of PCs. However, expression of proneural genes is not sufficient to determine cell fate. In the second step, Skor-family proteins act as gatekeepers to prevent cells from becoming GCs. Foxp, Skor, and Lhx-family proteins cooperate to promote PC differentiation. The two-step control of PC differentiation ensures that an appropriate number of PCs and GCs are generated to form functional cerebellar neural circuits. Among *ptf1a*<sup>+</sup> neural progenitors, *foxp1b/4* and *skor1b/2* are only expressed in cells that differentiate into PCs, but not INs, ECs, or GCs. There should be upstream regulators that restrict their expression only to PCs. Studies of factors that function upstream and downstream of *foxp*- and *skor*-family genes will provide an understanding of gene networks that control the differentiation of PCs and other cerebellar neurons.

## MATERIALS and METHODS

### Zebrafish strains and genes

The animal work in this study was approved by the Nagoya University Animal Experiment Committee and was conducted in accordance with the Regulations on Animal Experiments at Nagoya University. Wild-type zebrafish with the Oregon AB genetic background were used. For immunohistochemistry and whole-mount *in situ* hybridization, larvae were treated with 0.003% 1-phenyl-2-thiourea (PTU) (Nacalai-Tesque, 27429-22) to inhibit the formation of pigmentation. Zebrafish mutant *ptfla*<sup>Δ4</sup> (*ptfla*<sup>nub34</sup>) and *neurogl*<sup>hi1059Tg</sup> were described previously (Golling et al., 2002; Itoh et al., 2020). Transgenic zebrafish *Tg(ptfla:EGFP)jh1Tg* (Pisharath et al., 2007), *TgBAC(ptfla:GAL4-VP16)jh16Tg* (Parsons et al., 2009), *Tg(UAS:RFP)nkuasrfp1aTg* (Asakawa et al., 2008), *TgBAC(neurogl:GFP)nns27Tg* (Satou et al., 2013), *TgBAC(atoh1c:GAL4FF)fh430Tg* (Kidwell et al., 2018), *TgBAC(gad1b:LOXP-DsRed-LOXP-GFP)nns26Tg*, and *TgBAC(slc17ab:LOXP-DsRed-LOXP-GFP)* (Satou et al., 2013) were also described previously. The allele names of the *ptfla*<sup>Tg(hsp70l-EGFP)</sup>, *foxp1b*<sup>Δ26</sup>, *foxp4*<sup>Δ7</sup>, *skor1b*<sup>Δ10</sup>, *skor2*<sup>Δ8</sup>, *lhx1a*<sup>Δ10</sup>, *lhx1b*<sup>Δ17</sup>, and *lhx5*<sup>Δ10</sup> lines established in this study are designated as *ptfla*<sup>nub121Tg</sup>, *foxp1b*<sup>nub89</sup>, *foxp4*<sup>nub90</sup>, *skor1b*<sup>nub91</sup>, *skor2*<sup>nub92</sup>, *lhx1a*<sup>nub93</sup>, *lhx1b*<sup>nub94</sup>, and *lhx5*<sup>nub95</sup> respectively, in ZFIN (<https://zfin.org>). The open reading frame (ORF) of *foxp1*, *foxp4*, *skor1b*, and *skor2* mRNAs were isolated by RT-PCR and their sequence information was deposited in DDBJ with the accession numbers LC760469, LC760470, LC760471, and LC760472, respectively. The *skor2* mRNA sequence in a public database (NM\_001045421) lacked a region encoding the carboxy-terminal region, so the full ORF of *skor2* was isolated in this study. Zebrafish were maintained at 28°C under a 14-h light and 10-h dark cycle. Embryos and larvae were maintained in embryonic medium (EM) (Westerfield, 2000).

### Establishment of transgenic zebrafish

To establish *Tg(5xUAS-hsp70l:mCherry-T2A-CreERT2)* fish, pENTR L1-R5 entry vector containing five repeats of the upstream activation sequence (UAS) and the *hsp70l* promoter (*5xUAS-hsp70l*) (Muto et al., 2017), and pENTR L5-L2 vector containing

mCherry cDNA, the 2A peptide sequence of *Thosea asigna* virus (TaV), CreERT2 recombinase cDNA (Ukita et al., 2009), and the SV40 polyadenylation signal (SV40pAS) from pCS2+ were subcloned to pDon122-Dest-RfaF, which was derived from a Tol1 donor plasmid (Koga et al., 2008; Koga et al., 2007), by the LR reaction of the Gateway system. To generate *Tg(cbln12:LOXP-TagCFP-LOXP-Kaede)* fish, the TagCFP DNA fragment was amplified from pTagCFP-N (Evrogen) by PCR with the primers

5'-GAAGATCTATAACTTCGTATAGCATACATTATACGAAGTTATACCGGTCGCC  
ACCATGAGCG-3' and

5'-CCGGAATTCCGGATCCATAACTTCGTATAATGTATGCTATACGAAGTTATACCACTAGAAATGCAGTG-3', and subcloned to *Bam*HI and *Eco*RI sites of pCS2+ after digestion with *Bgl*II and *Eco*RI (pCS2+IT1). Kaede cDNA from pCS2+Kaede was inserted to *Bam*HI and *Xba*I sites of pCS2+IT1-Kaede, which contains SV40pAS. The 2-kbp *cbln12* promoter (Dohaku et al., 2019) and IT1-Kaede-pAS were subcloned to pT2ALR-Dest by NEBuilder (NEB, USA, E2621L). To generate *Tg(5xUAS-hsp70l:HA-skor2-P2A-mCherry, myl7:mCherry)*, 3xHA (influenza hemagglutinin)-tagged *skor2* cDNAs, the 2A peptide sequence from porcine teschovirus-1 (PTV1), and mCherry cDNA were subcloned into pCS2+, and transferred to the pENTR L5-L2 vector by the BP reaction of the Gateway system. The pENTR L1-R5 plasmid containing *5xUAS-hsp70l* and pENTR L5-L2 containing the *skor2* expression cassette were subcloned into pBleeding Heart (pBH)-R1-R2 (Dohaku et al., 2019), which contains mCherry cDNA and SV40pAS under control of the *myosin, light chain 7, regulatory (myl7)* promoter. To generate *Tg(5xUAS-hsp70l:birA-P2A-mCherry, myl7:mCherry)*, pENTR L1-L5 plasmid which contains *5xUAS-hsp70l*, and pENTR L5-L2 which contains the biotin ligase (BirA) cDNA (Matsuda et al., 2017), the 2A peptide sequence from PTV1, and mCherry cDNA were subcloned into pBH-R1-R2. To make transgenic fish, 25 pg of Tol2 plasmid DNA and 25 pg of Tol2 transposase RNA, or 20 pg of Tol1 plasmid DNA and 80 pg of Tol1 transposase RNA were injected into 1-cell stage WT embryos. The allele names of the Tg line established in this study were designated as *Tg(5xUAS-hsp70l:mCherry-T2A-CreERT2)nub99Tg*, *Tg(cbln12:LOXP-TagCFP-LOXP-Kaede)nub96Tg*,



*Tg(5xUAS-hsp70l:HA-skor2-P2A-mCherry, myl7:mCherry)nub97Tg*, and *Tg(5xUAS-hsp70l:BirA-P2A-mCherry, myl7:mCherry)nub122Tg* in ZFIN.

### Establishment of zebrafish knock-out and knock-in mutants by the CRISPR/Cas9 system

The gRNA targets were designed by the web software ZiFit Targeter and CRISPRscan (Hwang et al., 2013; Mali et al., 2013; Moreno-Mateos et al., 2015). To generate gRNAs, the following oligonucleotides were used: 5'-TAGGCCGGTGTTCAGAGCACAG-3' and 5'-AAACCTGTGCTCTGAACACCGG-3' for *foxp4*<sup>A7</sup>; 5'-TAGGAGATCCTCAGGCCGCGG-3' and 5'-AAACCCGCGGCCTGAGGATCT-3' for *skor1b*<sup>A10</sup>; 5'-TAGGTTATCATGCCACAGCGC-3' and 5'-AAACGCGCTGTGGCATGATAA-3' for *skor2*<sup>A8</sup>; 5'-TAGGAAGAGGCGGAGGCGCATG-3' and 5'-AAACCATGCGCCTCCGCCTCTT-3' for *ptfla*<sup>Tg(hsp70l-EGFP)</sup>, which was previously used to generate *ptfla*<sup>A4</sup> mutant (Itoh et al., 2020). gRNA and Cas9 mRNA syntheses were performed as previously reported (Nimura et al., 2019). A solution containing 25 ng/μL gRNA and 100 ng/μL Cas9 mRNA or 1000 ng/μL Cas9 protein (ToolGen Inc.) was injected into one-cell-stage embryos using a pneumatic microinjector (PV830, WPI). The knock-in line *ptfla*<sup>Tg(hsp70l-EGFP)</sup> was generated as previously described (Kimura et al., 2014). To establish the *foxp1b* mutant, chemically synthesized crRNAs and tracrRNAs (Fasmac) were used. The following target sequences were selected: 5'-TGGCGTGAGAGGGGCCGTTG-3'. To establish *lhx1a*, *lhx1b*, and *lhx5* mutants and *foxp1b*, *foxp4*, *skor1b*, *skor2* crispants (F0 mutants), chemically synthesized Alt-R® crRNAs and tracrRNAs, and Cas9 protein (Integrated DNA Technologies, USA) were used. The following target sequences were selected: 5'-GCGAGAGGCCTATATTGGACAGG-3' for *lhx1a*, 5'-TGAGCGTCTTGGACAGAGCCTGG-3' for *lhx1b*, 5'-GTGAGAGGCCCATCTCTGGATCGG-3' for *lhx5*, 5'-ACGGTCACGGCGTCTGCAAA-3' for *foxp1b*, 5'-GATCTGAGGTGAGACCTTGG-3' for *foxp4*, 5'-CGGGATGATTACAAAGCGAG-3' for *skor1b*, and

5'-CCACAACCGTCGAGTAGCTC-3' for *skor2*. To prepare the crRNA:tracrRNA Duplex and gRNA, Cas9 RNP Complexes were established as previously reported (Hoshijima et al., 2019). To generate crispants, a solution was prepared containing 5  $\mu$ M crRNA, 5  $\mu$ M tracrRNA, and 5  $\mu$ M Cas9 proteins for *skor1b*, *skor2*, *lhx1a*, *lhx1b*, and *lhx5*. For *foxp1b* and *foxp4*, the solution contained 10  $\mu$ M crRNA, 10  $\mu$ M tracrRNA, and 10  $\mu$ M Cas9 protein. One nL of the respective solution was injected into one-cell-stage embryos. Mutations on the target region were detected by a heteroduplex mobility assay (Ota et al., 2013) and confirmed by sequencing after subcloning the target regions amplified from the mutant genome into pTAC-2 (BioDynamics Laboratory, DS126).

### Genotyping

To detect mutations, the following primers were used: 5'-CCCCTCAGTTTACCCAG-3' and 5'-TGAGTAGCGTCTGCGTATGG-3' (*foxp1b*<sup>426</sup>); 5' -CTAGGTCGACGCTGGATGAT-3' and 5' -CGACTGAAAATCTTCAAACACAG-3' (*foxp1b* crispants); 5'-TGTTTTAGCCATGTGTCCCACTGA-3' and 5'-GCTGTTGGTGGTCAGATCGA-3' (*foxp4*<sup>47</sup>); 5' -CTCGATCTGACCACCAACAG-3' and 5' -GCTCATGCATTTTCCACTGA-3' (*foxp4* crispants); 5'-CCTCTCGGCCTCTCGCTTTGTA-3' and 5'-CTGGGCATCACCTGTGTGCA-3' (*skor1b*<sup>410</sup>); 5' -TATGCCCATTTCCTCGAGAC-3' and 5' -TCAAAAGCGAAATTTCTGG-3' (*skor1b* crispants); 5'-AGACATTGTGATGGCAACCCCA-3' and 5'-CGTAGAGGATGACCTGCCCA-3' (*skor2*<sup>48</sup>); 5' -CCTGGCTCAGATATCCAACA-3' and 5' -GGATCTCAAGCTGGACTGGA-3' (*skor2* crispants); 5'-GGAGCACATCCAAAGACGAT-3' and 5'-CTTGATGTGCCATGCTCTGT-3' (*lhx1a*<sup>410</sup>); 5'-CAAAACATGGTCCACTGTGC-3' and 5'-TGCATTTACAGTCACAGCATTG-3' (*lhx1b*<sup>417</sup>); 5'-CGGAATGATGGTGCAC-3' and 5'-GTTACACTCGCAGCATTGGA-3' (*lhx5*<sup>410</sup>). To detect *neurogl*<sup>hi1059Tg</sup> mutation, which is induced by retrovirus insertion, the following three primers were used:

5'-AAAGAAAAGTGGTGGGAAAGCC-3' as the forward primer annealing to the genomic region adjacent to the retrovirus's 5'-portion, 5'-TCGCTTCTCGCTTCTGTTCG-3' as the reverse primer annealing to the retrovirus's 3'-portion, and 5'-GCACAACGTTAGGTATTCAGTGTG-3' as another reverse primer annealing to the genomic region adjacent to the retrovirus's 3'-portion. The WT and *neurog1*<sup>hi1059Tg</sup> mutant alleles gave rise to 412 and 300 bp DNA fragments, respectively.

### **Treatment with endoxifen**

4  $\mu$ M endoxifen solution was prepared by adding 0.96  $\mu$ L of 25 mM endoxifen (Sigma-Aldrich, SML2368) dissolved in DMSO into 6 mL of E3 medium (5 mM NaCl, 0.17 mM KCl, 0.4 mM CaCl<sub>2</sub>, and 0.16 mM MgSO<sub>4</sub>) containing 0.004% PTU. To induce CreERT2-mediated recombination, 2 dpf larvae were treated with the endoxifen solution for 16 h. After washing with E3/PTU medium, larvae were cultivated in this medium until 5 dpf. For the control, DMSO was used instead of 25 mM endoxifen DMSO stock.

### **In situ hybridization**

Whole mount in situ hybridization was performed as previously reported (Bae et al., 2009). Detection of *ptfla* and *neurog1* was previously described (Bae et al., 2005; Kani et al., 2010). Larvae were hybridized with digoxigenin (DIG)-labeled riboprobes overnight at 65°C and incubated overnight with 1/2000 alkaline phosphatase-conjugated anti-DIG Fab fragment (Roche, 11093274910) at 4°C. BM purple AP substrate (Roche, 11442074001) was used as the alkaline phosphatase substrate. Images were acquired using an Axio-Plan-2 microscope equipped with an AxioCam CCD camera (Zeiss).

### **Generation of antibodies and immunohistochemistry**

Polyclonal antibodies against Foxp1b, Skor1b, and Skor2 were generated by immunizing rabbits with the synthetic peptides CHRDYEDDHGTE<sup>D</sup>MLMESIPNQLPAGRDSSC, and CIPYANIIRKEKVGTHLNKS (the underlined C was added to link the peptides covalently with keyhole limpet hemocyanin), respectively.

These antibodies were purified using peptide affinity columns that were generated by vinyl polymer resin (TOSOH Bioscience, TOYOPearL AF-Amino-650) and crosslinker m-maleimidobenzoyl-N-hydroxysuccinimide ester (MBS, ThermoFisher Scientific, 22311). For immunostaining, anti-parvalbumin 7 [Pvalb7] (1/1000, mouse monoclonal ascites), anti-carboxy anhydrase 8 [Ca8] (1/100, mouse monoclonal, hybridoma supernatant) (Bae et al., 2009), anti-ZebrinII (1/200, mouse monoclonal hybridoma supernatant) (Lannoo et al., 1991), anti-Vglut1 (1/250, rabbit polyclonal) (Bae et al., 2009), anti-Neurod1 (1/500, mouse monoclonal, hybridoma) (Kani et al., 2010), anti-paired box 2 [Pax2] (1/700, rabbit polyclonal) (BioLegend, 901001), anti-Foxp1b, anti-Skor1b, and anti-Skor2 (1/1000, rabbit polyclonal, affinity purified) were used. CF488A goat anti-mouse IgG (H+L, Biotium, 20018-1), CF488A goat anti-rabbit IgG (H+L, Biotium, 20019), CF568 goat anti-mouse IgG (H+L, Biotium, 20301-1) and CF568 goat anti-rabbit IgG (H+L, Biotium, 20103) were used as the secondary antibodies. Larvae and cryosections were immuno-stained as described previously (Bae et al., 2005; Itoh et al., 2020; Kani et al., 2010). For Skor1b and Skor2 immunostaining, larvae were fixed and treated with acetone 4°C instead of -30°C. An LSM700 confocal laser-scanning microscope was used to obtain fluorescence images. Images were acquired under nearly identical conditions. To show individual cells, confocal optical sections were used (Fig. 6). In Fig. 9 (T-AE), the dynamic range of fluorescence intensity was modified to compensate for differences in the expression of fluorescent proteins and staining conditions.

### Quantification of image data

To quantify *in situ* hybridization and immunohistochemistry data with some exceptions, image data were imported into the image processing software ImageJ (<https://imagej.net/ij/>) and Fiji (Fiji (<https://fiji.sc>)), and the cerebellar region was cropped from the image. Binarization was performed after manually setting an arbitrary threshold. The areas with signals were measured. The average area of the data obtained for each was calculated, and it was compared with the data from WT. Ratings were given based on comparison with WT data: +++, ++, +, or - for values of 0.8 or higher, 0.5 to 0.8, 0.01 to 0.5, and less than 0.01, respectively. In some cases, only a subset of

the larvae showing an expression phenotype were qualitatively assessed. Due to a high background, the expression of *vglut2a* in *ptfla;neurog1*, *foxp1b;foxp4*, and *skor1b;skor2* mutants, as well as the expression of *foxp4* and *reln* in *skor1b;skor2* mutants was visually assessed and rated.

### **Cell transfection, immunoprecipitation, and immunoblotting**

cDNAs encoding carboxy-terminally 3x hemagglutinin epitope-tagged Skor1b or Skor2 (Skor1b-3xHA, Skor2-3xHA), amino-terminally 6x Myc epitope-tagged Skor1b or Skor2 (6xMT-Skor1b, 6xMT-Skor2), and amino-terminally 3x Flag epitope-tagged Lhx1a, Lhx1b, or Lhx5 were inserted to pCS2+. HEK293T cells in 6 cm dishes were transfected with 2 µg Skor expression plasmid DNA, 2 µg Lhx expression plasmid DNA, and 1 µg pCS2+Venus in an indicated combination by using HilyMax (DOJINDO Laboratories, H357). For the control, 2 µg pCS2+ was added to bring the total amount to 5 µg. Cells were lysed, 24 h after transfection, in 1 mL lysis buffer (10 mM Tris pH 7.4, 150 mM NaCl<sub>2</sub>, 0.5% NP40) containing protease inhibitor cocktail (Nacalai-Tesque, #25955) and cleared by centrifugation. For immunoprecipitation, 1 µg antibody was bound to 10 µL Dynabeads protein G (ThermoFisher Scientific, Invitrogen, #10003D) for 20 min at room temperature and washed with lysis buffer. 500 µL of cell lysates were mixed with antibody-bound protein G beads and incubated at 4°C for 2 h with rotation. Antibody-bound fractions were collected by magnetic beads, washed by lysis buffer five times, and eluted by 20 µL 2x SDS-polyacrylamide electrophoresis (PAGE) sample buffer. Immunoprecipitated samples were separated on a polyacrylamide gel (SuperSep, Wako, #194-15021, 197-15011) and transferred to a PVDF membrane (Immobilon-P, Millipore, #IPVH00010). After blocking with 3% skimmed milk, TBS-T (20 mM Tris pH 7.4, 150 mM NaCl, 0.1% Tween-20). The membranes were immunoblotted with CanGet Signal (TOYOBO, #NK101) and Chemi lumi One L (Nacalai, 07880-54). The antibodies used were anti-HA mouse IgG1-κ (HA124, Nacalai, 06340-54), anti-c-Myc mouse IgG1-κ (9E10, Santa Cruz Biotechnology, #sc-40), and anti-Flag mouse IgG1 (M1, Sigma-Aldrich, #F3165). Images were captured by a CCD camera Lumiviewer.

## **Statistics**

Data were analyzed using Graphpad PRISM (ver. 5.1 and 6.0) or R software package (ver. 4.2.2).

## **Acknowledgements**

We thank Shin-ichi Higashijima, Michael J. Parsons, Koichi Kawakami, and the National Bioresource Project for providing the transgenic zebrafish, Masato Kinoshita and Feng Zhang for the hSpCas9 plasmid, Richard R. Behringer and Hiroshi Sasaki for the mCherry-T2A-CreERTe plasmid, Koichi Kawakami for the Tol2-related plasmids, and Kuniyo Kondoh and Yumiko Takayanagi for managing fish mating and care. We also thank the members of the Hibi Laboratory for helpful discussion.

## **Competing interests**

The authors declare no competing or financial interests.

## **Author contributions**

Conceptualization: M.H.; Formal analysis: T.I., M.U., S.Y., J.W., Y.F., A.N.; Writing-original draft: T.I., M.H.; Writing-review & editing: T.I., T.S., M.H.; Supervision: M.H.; Funding acquisition: T.S., M.H.

## **Funding**

This work was supported by the Japan Society for the Promotion of Science KAKENHI (JP15H04376, JP18H02448, and JP22H02631 to M.H., JP18K06333 to T.S.), and Core Research for Evolutional Science and Technology Japan Science and Technology Agency (JPMJCR1753 to M.H.).

## References

- Adolf, B., Bellipanni, G., Huber, V. and Bally-Cuif, L.** (2004). *atoh1.2* and *beta3.1* are two new bHLH-encoding genes expressed in selective precursor cells of the zebrafish anterior hindbrain. *Gene Expr Patterns* **5**, 35-41.
- Asakawa, K., Suster, M. L., Mizusawa, K., Nagayoshi, S., Kotani, T., Urasaki, A., Kishimoto, Y., Hibi, M. and Kawakami, K.** (2008). Genetic dissection of neural circuits by *Tol2* transposon-mediated Gal4 gene and enhancer trapping in zebrafish. *Proc Natl Acad Sci U S A* **105**, 1255-1260.
- Bae, Y. K., Kani, S., Shimizu, T., Tanabe, K., Nojima, H., Kimura, Y., Higashijima, S. and Hibi, M.** (2009). Anatomy of zebrafish cerebellum and screen for mutations affecting its development. *Dev Biol* **330**, 406-426.
- Bae, Y. K., Shimizu, T. and Hibi, M.** (2005). Patterning of proneuronal and inter-proneuronal domains by hairy- and enhancer of split-related genes in zebrafish neuroectoderm. *Development* **132**, 1375-1385.
- Ben-Arie, N., Bellen, H. J., Armstrong, D. L., McCall, A. E., Gordadze, P. R., Guo, Q., Matzuk, M. M. and Zoghbi, H. Y.** (1997). *Math1* is essential for genesis of cerebellar granule neurons. *Nature* **390**, 169-172.
- Biechl, D., Dorigo, A., Köster, R. W., Grothe, B. and Wullmann, M. F.** (2016). Eppur Si Muove: Evidence for an External Granular Layer and Possibly Transit Amplification in the Teleostean Cerebellum. *Front Neuroanat* **10**, 49.
- Chaplin, N., Tendeng, C. and Wingate, R. J.** (2010). Absence of an External Germinal Layer in Zebrafish and Shark Reveals a Distinct, Anamniote Ground Plan of Cerebellum Development. *J Neurosci* **30**, 3048-3057.
- Chokas, A. L., Trivedi, C. M., Lu, M. M., Tucker, P. W., Li, S., Epstein, J. A. and Morrissey, E. E.** (2010). Foxp1/2/4-NuRD interactions regulate gene expression and epithelial injury response in the lung via regulation of interleukin-6. *J Biol Chem* **285**, 13304-13313.
- Corrales, J. D., Blaess, S., Mahoney, E. M. and Joyner, A. L.** (2006). The level of sonic hedgehog signaling regulates the complexity of cerebellar foliation. *Development* **133**, 1811-1821.



- Dasen, J. S., De Camilli, A., Wang, B., Tucker, P. W. and Jessell, T. M.** (2008). Hox Repertoires for Motor Neuron Diversity and Connectivity Gated by a Single Accessory Factor, FoxP1. *Cell* **134**, 304-316.
- Dohaku, R., Yamaguchi, M., Yamamoto, N., Shimizu, T., Osakada, F. and Hibi, M.** (2019). Tracing of Afferent Connections in the Zebrafish Cerebellum Using Recombinant Rabies Virus. *Front Neural Circuits* **13**, 30.
- Ferland, R. J., Cherry, T. J., Preware, P. O., Morrissey, E. E. and Walsh, C. A.** (2003). Characterization of Foxp2 and Foxp1 mRNA and protein in the developing and mature brain. *J Comp Neurol* **460**, 266-279.
- Fujita, H. and Sugihara, I.** (2012). FoxP2 expression in the cerebellum and inferior olive: development of the transverse stripe-shaped expression pattern in the mouse cerebellar cortex. *J Comp Neurol* **520**, 656-677.
- Fujiyama, T., Yamada, M., Terao, M., Terashima, T., Hioki, H., Inoue, Y. U., Inoue, T., Masuyama, N., Obata, K., Yanagawa, Y., et al.** (2009). Inhibitory and excitatory subtypes of cochlear nucleus neurons are defined by distinct bHLH transcription factors, Ptf1a and Atoh1. *Development* **136**, 2049-2058.
- Golling, G., Amsterdam, A., Sun, Z., Antonelli, M., Maldonado, E., Chen, W., Burgess, S., Haldi, M., Artzt, K., Farrington, S., et al.** (2002). Insertional mutagenesis in zebrafish rapidly identifies genes essential for early vertebrate development. *Nat Genet* **31**, 135-140.
- Hashimoto, M. and Hibi, M.** (2012). Development and evolution of cerebellar neural circuits. *Dev Growth Differ* **54**, 373-389.
- Hibi, M., Matsuda, K., Takeuchi, M., Shimizu, T. and Murakami, Y.** (2017). Evolutionary mechanisms that generate morphology and neural-circuit diversity of the cerebellum. *Dev Growth Differ* **59**, 228-243.
- Hibi, M. and Shimizu, T.** (2012). Development of the cerebellum and cerebellar neural circuits. *Dev Neurobiol* **72**, 282-301.
- Hobert, O. and Westphal, H.** (2000). Functions of LIM-homeobox genes. *Trends Genet* **16**, 75-83.

- Hoshijima, K., Juryne, M. J., Klatt Shaw, D., Jacobi, A. M., Behlke, M. A. and Grunwald, D. J.** (2019). Highly Efficient CRISPR-Cas9-Based Methods for Generating Deletion Mutations and F0 Embryos that Lack Gene Function in Zebrafish. *Dev Cell* **51**, 645-657 e644.
- Hoshino, M.** (2012). Neuronal subtype specification in the cerebellum and dorsal hindbrain. *Dev Growth Differ* **54**, 317-326.
- Hoshino, M., Nakamura, S., Mori, K., Kawauchi, T., Terao, M., Nishimura, Y. V., Fukuda, A., Fuse, T., Matsuo, N., Sone, M., et al.** (2005). *Ptf1a*, a bHLH Transcriptional Gene, Defines GABAergic Neuronal Fates in Cerebellum. *Neuron* **47**, 201-213.
- Hwang, W. Y., Fu, Y., Reyon, D., Maeder, M. L., Tsai, S. Q., Sander, J. D., Peterson, R. T., Yeh, J. R. and Joung, J. K.** (2013). Efficient genome editing in zebrafish using a CRISPR-Cas system. *Nat Biotechnol* **31**, 227-229.
- Itoh, T., Takeuchi, M., Sakagami, M., Asakawa, K., Sumiyama, K., Kawakami, K., Shimizu, T. and Hibi, M.** (2020). *Gsx2* is required for specification of neurons in the inferior olivary nuclei from *Ptf1a*-expressing neural progenitors in zebrafish. *Development* **147**, dev190603.
- Kani, S., Bae, Y. K., Shimizu, T., Tanabe, K., Satou, C., Parsons, M. J., Scott, E., Higashijima, S. and Hibi, M.** (2010). Proneural gene-linked neurogenesis in zebrafish cerebellum. *Dev Biol* **343**, 1-17.
- Kidwell, C. U., Su, C. Y., Hibi, M. and Moens, C. B.** (2018). Multiple zebrafish *atoh1* genes specify a diversity of neuronal types in the zebrafish cerebellum. *Dev Biol* **438**, 44-56.
- Kimura, Y., Hisano, Y., Kawahara, A. and Higashijima, S.** (2014). Efficient generation of knock-in transgenic zebrafish carrying reporter/driver genes by CRISPR/Cas9-mediated genome engineering. *Sci Rep* **4**, 6545.
- Koga, A., Cheah, F. S., Hamaguchi, S., Yeo, G. H. and Chong, S. S.** (2008). Germline transgenesis of zebrafish using the medaka *Toll* transposon system. *Dev Dyn* **237**, 2466-2474.

- Koga, A., Higashide, I., Hori, H., Wakamatsu, Y., Kyono-Hamaguchi, Y. and Hamaguchi, S.** (2007). The *Toll* element of medaka fish is transposed with only terminal regions and can deliver large DNA fragments into the chromosomes. *J Hum Genet* **52**, 1026-1030.
- Koster, R. W. and Fraser, S. E.** (2001). Direct imaging of in vivo neuronal migration in the developing cerebellum. *Curr Biol* **11**, 1858-1863.
- Lannoo, M. J., Brochu, G., Maler, L. and Hawkes, R.** (1991). Zebrin II immunoreactivity in the rat and in the weakly electric teleost *Eigenmannia* (gymnotiformes) reveals three modes of Purkinje cell development. *J Comp Neurol* **310**, 215-233.
- Lewis, P. M., Gritli-Linde, A., Smeyne, R., Kottmann, A. and McMahon, A. P.** (2004). Sonic hedgehog signaling is required for expansion of granule neuron precursors and patterning of the mouse cerebellum. *Dev Biol* **270**, 393-410.
- Lundell, T. G., Zhou, Q. and Doughty, M. L.** (2009). Neurogenin1 expression in cell lineages of the cerebellar cortex in embryonic and postnatal mice. *Dev Dyn* **238**, 3310-3325.
- Machold, R. and Fishell, G.** (2005). Math1 is Expressed in Temporally Discrete Pools of Cerebellar Rhombic-Lip Neural Progenitors. *Neuron* **48**, 17-24.
- Mali, P., Yang, L., Esvelt, K. M., Aach, J., Guell, M., DiCarlo, J. E., Norville, J. E. and Church, G. M.** (2013). RNA-Guided Human Genome Engineering via Cas9. *Science* **339**, 823-826.
- Matsuda, K., Mikami, T., Oki, S., Iida, H., Andrabi, M., Boss, J. M., Yamaguchi, K., Shigenobu, S. and Kondoh, H.** (2017). ChIP-seq analysis of genomic binding regions of five major transcription factors highlights a central role for ZIC2 in the mouse epiblast stem cell gene regulatory network. *Development* **144**, 1948-1958.
- McFarland, K. A., Topczewska, J. M., Weidinger, G., Dorsky, R. I. and Appel, B.** (2008). Hh and Wnt signaling regulate formation of olig2<sup>+</sup> neurons in the zebrafish cerebellum. *Dev Biol* **318**, 162-171.

- Miyata, T., Maeda, T. and Lee, J. E.** (1999). NeuroD is required for differentiation of the granule cells in the cerebellum and hippocampus. *Genes Dev* **13**, 1647-1652.
- Moreno-Mateos, M. A., Vejnar, C. E., Beaudoin, J. D., Fernandez, J. P., Mis, E. K., Khokha, M. K. and Giraldez, A. J.** (2015). CRISPRscan: designing highly efficient sgRNAs for CRISPR-Cas9 targeting *in vivo*. *Nat Methods* **12**, 982-988.
- Muto, A., Lal, P., Ailani, D., Abe, G., Itoh, M. and Kawakami, K.** (2017). Activation of the hypothalamic feeding centre upon visual prey detection. *Nat Commun* **8**, 15029.
- Nakatani, T., Minaki, Y., Kumai, M., Nitta, C. and Ono, Y.** (2014). The c-Ski family member and transcriptional regulator Corl2/Skor2 promotes early differentiation of cerebellar Purkinje cells. *Dev Biol* **388**, 68-80.
- Nimura, T., Itoh, T., Hagio, H., Hayashi, T., Di Donato, V., Takeuchi, M., Itoh, T., Inoguchi, F., Sato, Y., Yamamoto, N., et al.** (2019). Role of Reelin in cell positioning in the cerebellum and the cerebellum-like structure in zebrafish. *Dev Biol* **455**, 393-408.
- Ota, S., Hisano, Y., Muraki, M., Hoshijima, K., Dahlem, T. J., Grunwald, D. J., Okada, Y. and Kawahara, A.** (2013). Efficient identification of TALEN-mediated genome modifications using heteroduplex mobility assays. *Genes Cells* **18**, 450-458.
- Parsons, M. J., Pisharath, H., Yusuff, S., Moore, J. C., Siekmann, A. F., Lawson, N. and Leach, S. D.** (2009). Notch-responsive cells initiate the secondary transition in larval zebrafish pancreas. *Mech Dev* **126**, 898-912.
- Pascual, M., Abasolo, I., Mingorance-Le Meur, A., Martínez, A., Del Rio, J. A., Wright, C. V., Real, F. X. and Soriano, E.** (2007). Cerebellar GABAergic progenitors adopt an external granule cell-like phenotype in the absence of Ptf1a transcription factor expression. *Proc Natl Acad Sci U S A* **104**, 5193-5198.
- Pisharath, H., Rhee, J. M., Swanson, M. A., Leach, S. D. and Parsons, M. J.** (2007). Targeted ablation of beta cells in the embryonic zebrafish pancreas using *E. coli* nitroreductase. *Mech Dev* **124**, 218-229.

- Satou, C., Kimura, Y., Hirata, H., Suster, M. L., Kawakami, K. and Higashijima, S.** (2013). Transgenic tools to characterize neuronal properties of discrete populations of zebrafish neurons. *Development* **140**, 3927-3931.
- Shu, W., Cho, J. Y., Jiang, Y., Zhang, M., Weisz, D., Elder, G. A., Schmeidler, J., De Gasperi, R., Sosa, M. A., Rabidou, D., et al.** (2005). Altered ultrasonic vocalization in mice with a disruption in the *Foxp2* gene. *Proc Natl Acad Sci U S A* **102**, 9643-9648.
- Sudarov, A., Turnbull, R. K., Kim, E. J., Lebel-Potter, M., Guillemot, F. and Joyner, A. L.** (2011). *Ascl1* Genetics Reveals Insights into Cerebellum Local Circuit Assembly. *J Neurosci* **31**, 11055-11069.
- Surmeli, G., Akay, T., Ippolito, G. C., Tucker, P. W. and Jessell, T. M.** (2011). Patterns of Spinal Sensory-Motor Connectivity Prescribed by a Dorsoventral Positional Template. *Cell* **147**, 653-665.
- Takeuchi, M., Yamaguchi, S., Sakakibara, Y., Hayashi, T., Matsuda, K., Hara, Y., Tanegashima, C., Shimizu, T., Kuraku, S. and Hibi, M.** (2017). Gene expression profiling of granule cells and Purkinje cells in the zebrafish cerebellum. *J Comp Neurol* **525**, 1558-1585.
- Tam, W. Y., Leung, C. K., Tong, K. K. and Kwan, K. M.** (2011). Foxp4 is essential in maintenance of Purkinje cell dendritic arborization in the mouse cerebellum. *Neuroscience* **172**, 562-571.
- Tanabe, Y., Fujiwara, Y., Matsuzaki, A., Fujita, E., Kasahara, T., Yuasa, S. and Momoi, T.** (2012). Temporal expression and mitochondrial localization of a Foxp2 isoform lacking the forkhead domain in developing Purkinje cells. *J Neurochem* **122**, 72-80.
- Ukita, K., Hirahara, S., Oshima, N., Imuta, Y., Yoshimoto, A., Jang, C. W., Oginuma, M., Saga, Y., Behringer, R. R., Kondoh, H., et al.** (2009). Wnt signaling maintains the notochord fate for progenitor cells and supports the posterior extension of the notochord. *Mech Dev* **126**, 791-803.
- Volkman, K., Rieger, S., Babaryka, A. and Koster, R. W.** (2008). The zebrafish cerebellar rhombic lip is spatially patterned in producing granule cell populations of different functional compartments. *Dev Biol* **313**, 167-180.

- Wallace, V. A.** (1999). Purkinje-cell-derived Sonic hedgehog regulates granule neuron precursor cell proliferation in the developing mouse cerebellum. *Curr Biol* **9**, 445-448.
- Wang, B., Harrison, W., Overbeek, P. A. and Zheng, H.** (2011). Transposon mutagenesis with coat color genotyping identifies an essential role for Skor2 in sonic hedgehog signaling and cerebellum development. *Development* **138**, 4487-4497.
- Wang, V. Y., Rose, M. F. and Zoghbi, H. Y.** (2005). *Math1* Expression Redefines the Rhombic Lip Derivatives and Reveals Novel Lineages within the Brainstem and Cerebellum. *Neuron* **48**, 31-43.
- Wechsler-Reya, R. J. and Scott, M. P.** (1999). Control of Neuronal Precursor Proliferation in the Cerebellum by Sonic Hedgehog. *Neuron* **22**, 103-114.
- Westerfield, M.** (2000). *The zebrafish book: a guide for the laboratory use of zebrafish*. 4<sup>th</sup> edn, University of Oregon Press. [https://zfin.org/zf\\_info/zfbook/zfbk.html](https://zfin.org/zf_info/zfbook/zfbk.html)
- Wingate, R.** (2005). Math-Map(ic)s. *Neuron* **48**, 1-4.
- Yamada, M., Seto, Y., Taya, S., Owa, T., Inoue, Y. U., Inoue, T., Kawaguchi, Y., Nabeshima, Y. and Hoshino, M.** (2014). Specification of Spatial Identities of Cerebellar Neuron Progenitors by Ptf1a and Atoh1 for Proper Production of GABAergic and Glutamatergic neurons. *J Neurosci* **34**, 4786-4800.
- Yamada, M., Terao, M., Terashima, T., Fujiyama, T., Kawaguchi, Y., Nabeshima, Y. and Hoshino, M.** (2007). Origin of Climbing Fiber Neurons and Their Developmental Dependence on Ptf1a. *J Neurosci* **27**, 10924-10934.
- Zhao, Y., Kwan, K. M., Mailloux, C. M., Lee, W. K., Grinberg, A., Wurst, W., Behringer, R. R. and Westphal, H.** (2007). LIM-homeodomain proteins Lhx1 and Lhx5, and their cofactor Ldb1, control Purkinje cell differentiation in the developing cerebellum. *Proc Natl Acad Sci U S A* **104**, 13182-13186.

# Figures and Tables

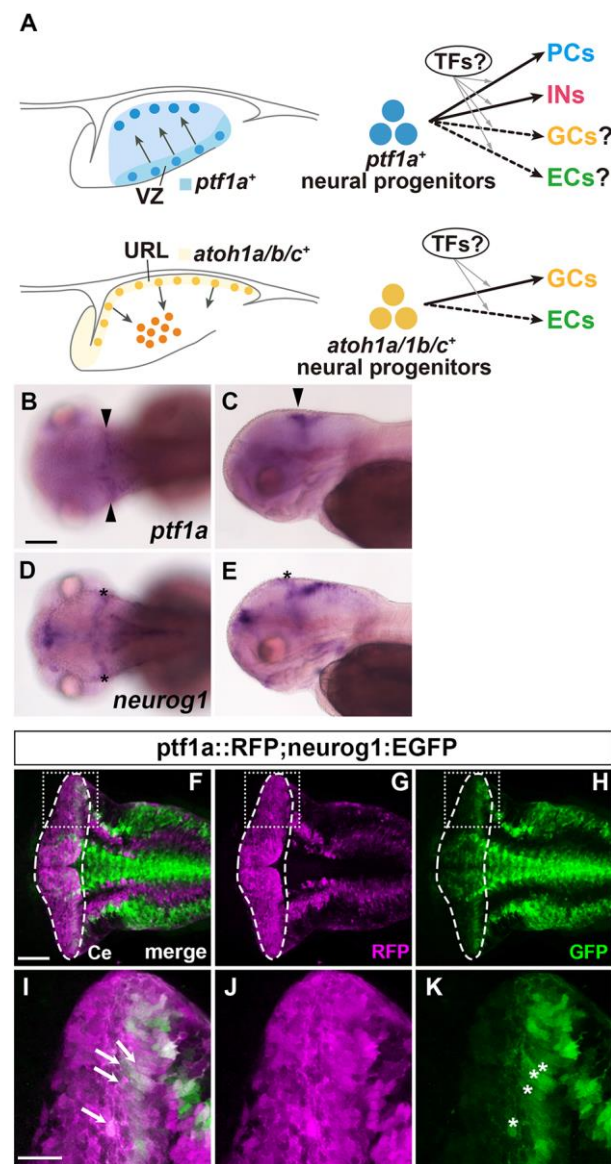

**Fig. 1. Expression of *ptf1a* and *neurogenin1* in the cerebellum.**

(A) Schematic diagram for cerebellar neurogenesis. (B-E) Expression of *ptf1a* (B, C) and *neurogenin1* (*neurog1*, D, E) mRNA at 3-dpf. Transcripts were detected by *in situ* hybridization. Dorsal (B, D) and lateral views (C, E) with anterior to the left. Expression of *ptf1a* in the cerebellar ventricular zone is marked by arrowheads. Expression of *neurog1*, marked by asterisks, was in the tectum but not the cerebellum.



(F-H) Detection of *ptf1a*- and/or *neurog1*-expressing cells using transgenic lines. 5-dpf *Tg(ptf1a:GAL4-VP16); Tg(UAS:RFP); Tg(neurog1:GFP)* larvae ( $n=3$ ) were stained with anti-RFP (magenta) and anti-GFP (green) antibodies. *Tg(ptf1a:GAL4-VP16); Tg(UAS:RFP)* (referred to as *ptf1a::RFP*). Dorsal views of the rostral hindbrain region, including the cerebellum. The cerebellar region (Ce) is surrounded by a dotted line. (I-J) Higher magnification views of boxes in E, F, G. The *ptf1a::RFP* and *neurog1:GFP* double-positive cells are marked by white arrows (H) and the expression of *neurog1:GFP*<sup>+</sup> cells in the cerebellar ventricular zone is indicated by white asterisks (H). Scale bars: 100  $\mu\text{m}$  in B (applies to B-E); 50  $\mu\text{m}$  in F (applies to F-H); 20  $\mu\text{m}$  in I (applies to I-K).

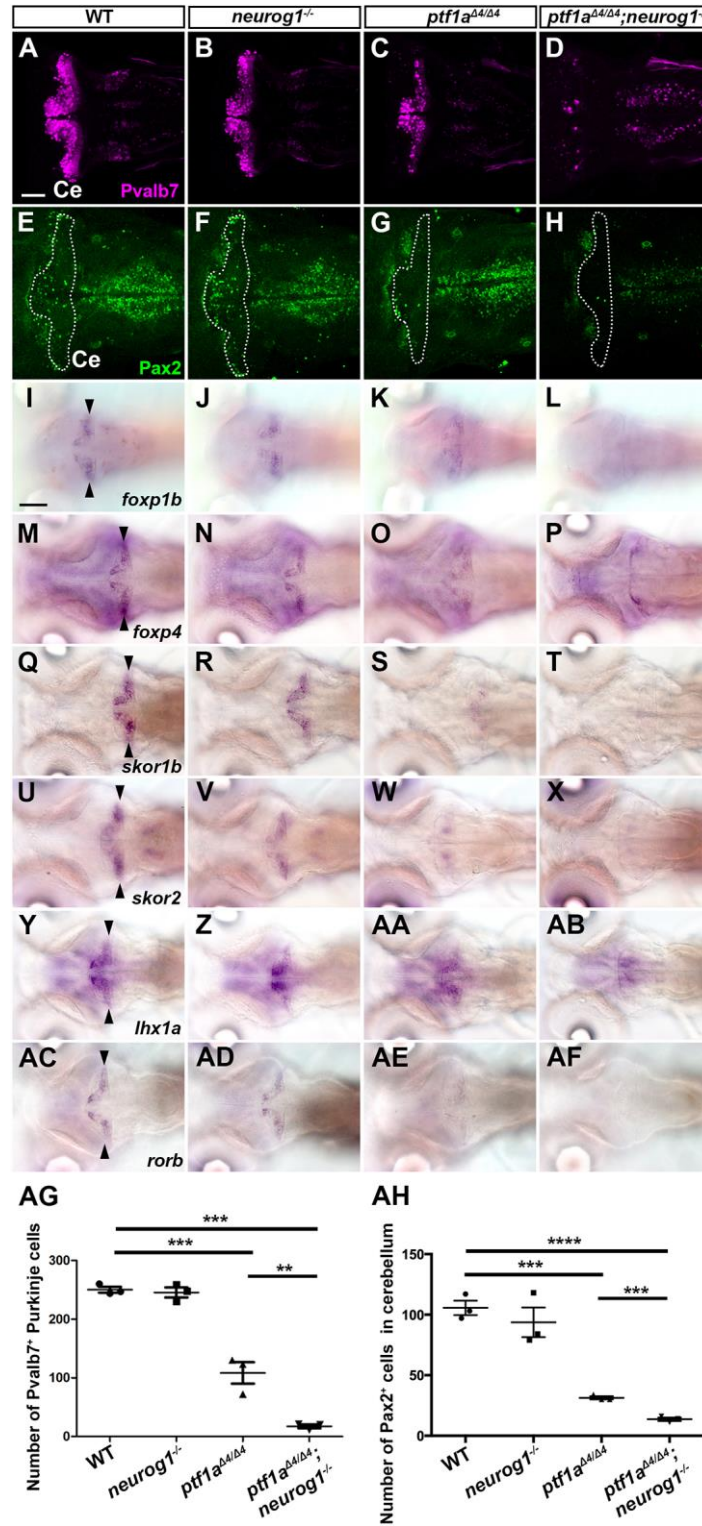

**Fig. 2. *ptfla* and *neurog1* are required for the development of GABAergic PCs and INs.**

(A-Z, AA-AF) Expression of parvalbumin7 (Pvalb7, A-D), Pax2 (E-H), *foxp1b* (I-L), *foxp4* (M-P), *skor1b* (Q-T), *skor2* (U-X), *lhx1a* (Y, Z, AA, AB), and *rorb* (AC-AF) in the cerebellum of 5-dpf wild-type (WT), *neurog1* mutant, *ptfla* mutant, or *ptfla;neurog1* double mutant larvae. Immunostaining with anti-Pvalb7 (A-D) and anti-Pax2 antibodies (E-H). *In situ* hybridization (I-Z, AA-AF). Dorsal views with anterior to the left. The cerebellum region (Ce) is surrounded by a dotted line (E-H). Pvalb7, *foxp1b/4*, *skor1b/2*, *lhx1a*, and *rorb* were expressed in PCs (expression of PC genes in the cerebellum is indicated by arrowheads). Pax2 is a marker of GABAergic INs. The number of examined larvae and larvae showing each expression pattern is described in Table 1. Scale bars: 50  $\mu$ m in A (applies to A-H); 100  $\mu$ m in I (applies to I-Z, AA-AF). (AG, AH) Number of Pvalb7<sup>+</sup> PCs and Pax2<sup>+</sup> INs in the cerebellum of 5-dpf WT, *neurog1*, *ptfla*, and *ptfla;neurog1* mutant larvae was plotted in graphs. \*\* $P < 0.01$ , \*\*\* $P < 0.001$ , \*\*\*\* $P < 0.0001$  (ANOVA with Tukey's multiple comparison test). Data are means $\pm$ SE. with individual values indicated.

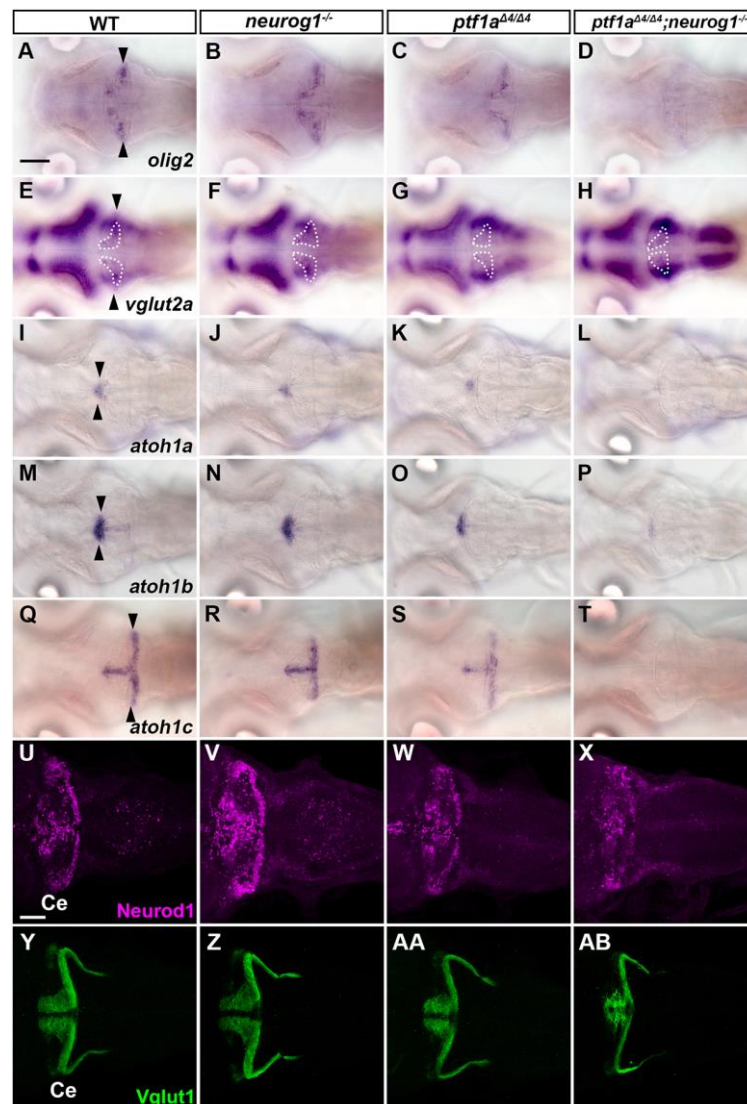

**Fig. 3. *ptfla* and *neurog1* are involved in the development of ECs and GCs.**

(A-T) Expression of *olig2* (A-D), *vglut2a* (E-H), *atoh1a* (I-L), *atoh1b* (M-P), and *atoh1c* (Q-T) in 5-dpf wild-type (WT), *neurog1*, *ptfla*, and *ptfla;neurog1* mutant larvae. *olig2* and *vglut2a* were expressed in ECs. *atoh1a/b/c* were expressed in GC progenitors. The expression area of *vglut2a* is surrounded by a dotted line (E-H). (U-Z, AA, AB) Expression of GC markers Neurod1 and Vglut1 in 5-dpf WT, *neurog1*, *ptfla*, and *ptfla;neurog1* mutant larvae. Expression pattern of Neurod1 and Vglut1 was affected in *ptfla* and *ptfla;neurog1* mutants, but the area of Neurod1-expression domains was variable in *ptfla* mutants. The number of examined larvae and larvae showing each expression pattern is described in Table 1. Scale bars: 100  $\mu$ m in A (applies to A-T); 50  $\mu$ m in U (applies to U-Z, AA, AB).

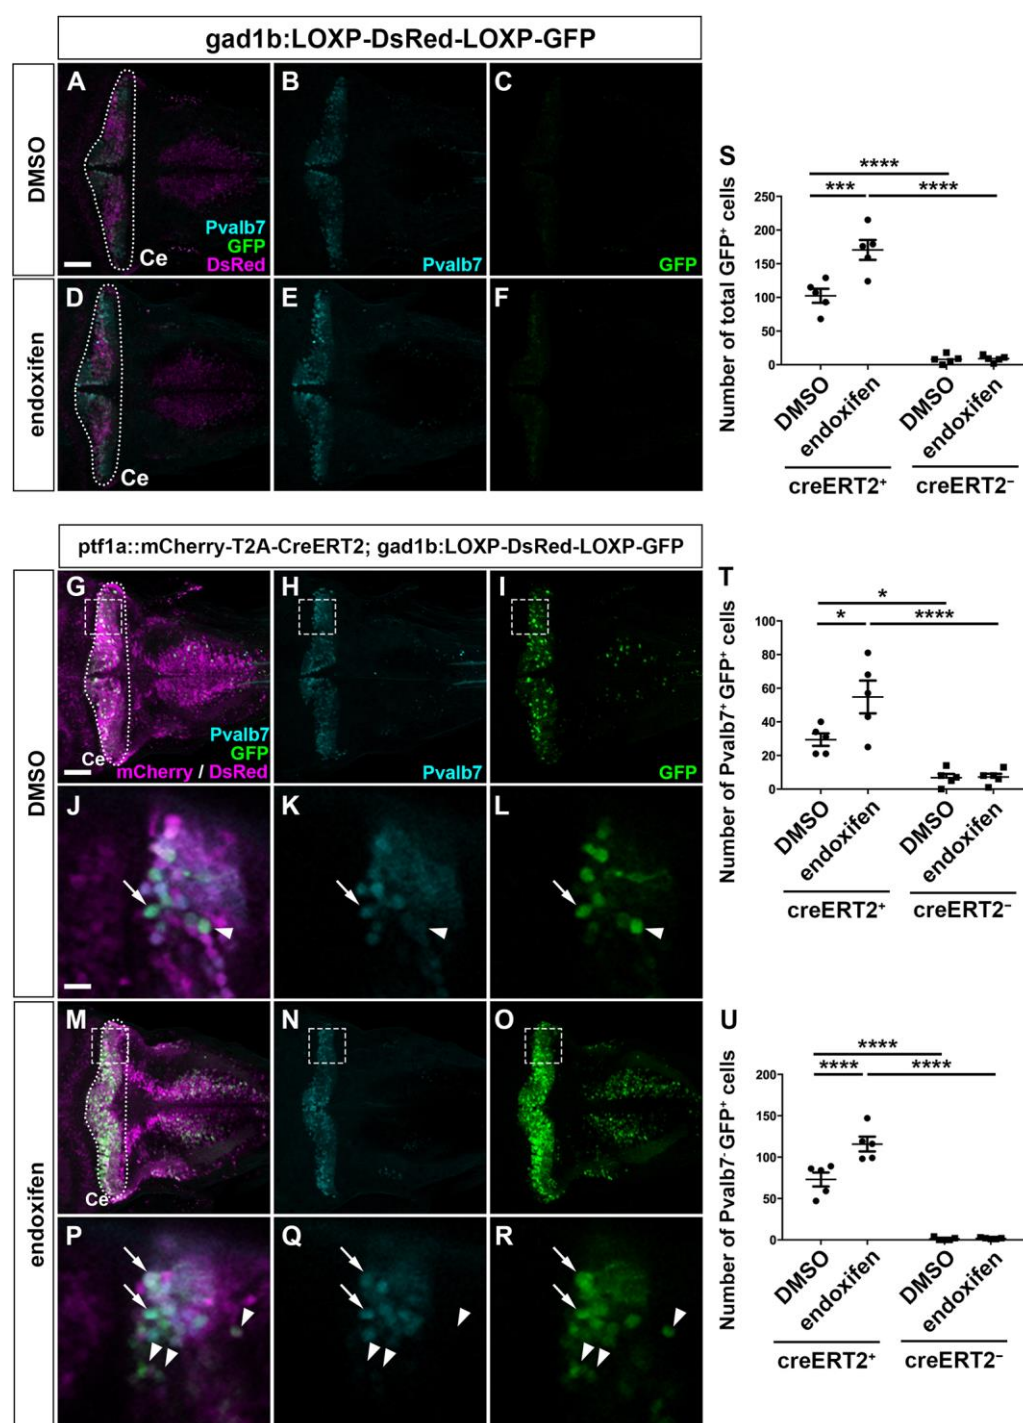

**Fig. 4. GABAergic PCs and INs were derived from Ptf1a-expressing neural progenitors.**

(A-F) Expression of Pvalb7 and GFP in 5-dpf *TgBAC(gad1b:LOXP-DsRed-LOXP-GFP)* larvae that were treated with DMSO (control,

$n=5$ , A-C) or endoxifen ( $n=5$ , D-F) at 2-dpf. (G-R) Expression of Pvalb7 and GFP in 5-dpf *TgBAC(ptfla:Gal4-VP16); Tg(UAS-hsp70l:mCherry-T2A-CreERT2); TgBAC(gad1b:LOXP-DsRed-LOXP-GFP)* larvae that were treated with DMSO ( $n=5$ , G-L) or endoxifen ( $n=5$ , M-R) at 2-dpf. The larvae were stained with anti-Pvalb7 (cyan), anti-RFP (magenta), and anti-GFP (green) antibodies. Dorsal views with anterior to the left. The cerebellum region (Ce) is surrounded by a dotted line. (J-L, P-R) Higher magnification views of boxes in (G-I, M-O). Arrows and arrowheads indicate Pvalb7<sup>+</sup> GFP<sup>+</sup> cells (PCs) and Pvalb7<sup>-</sup> GFP<sup>+</sup> cells (INs). Scale bars: 50  $\mu$ m in A (applies to A-F); 50  $\mu$ m in G (applies to G-I, M-O); 10  $\mu$ m in J (applies to J-L, P-R). (S-U) Total number of GFP<sup>+</sup> cells (S), Pvalb7<sup>+</sup> GFP<sup>+</sup> cells (T), and Pvalb7<sup>-</sup> GFP<sup>+</sup> cells (U). \* $P<0.05$ , \*\*\* $P<0.001$ , \*\*\*\* $P<0.0001$  (two-way ANOVA followed by Bonferroni multiple comparisons). Data are means $\pm$ SE with individual values indicated.



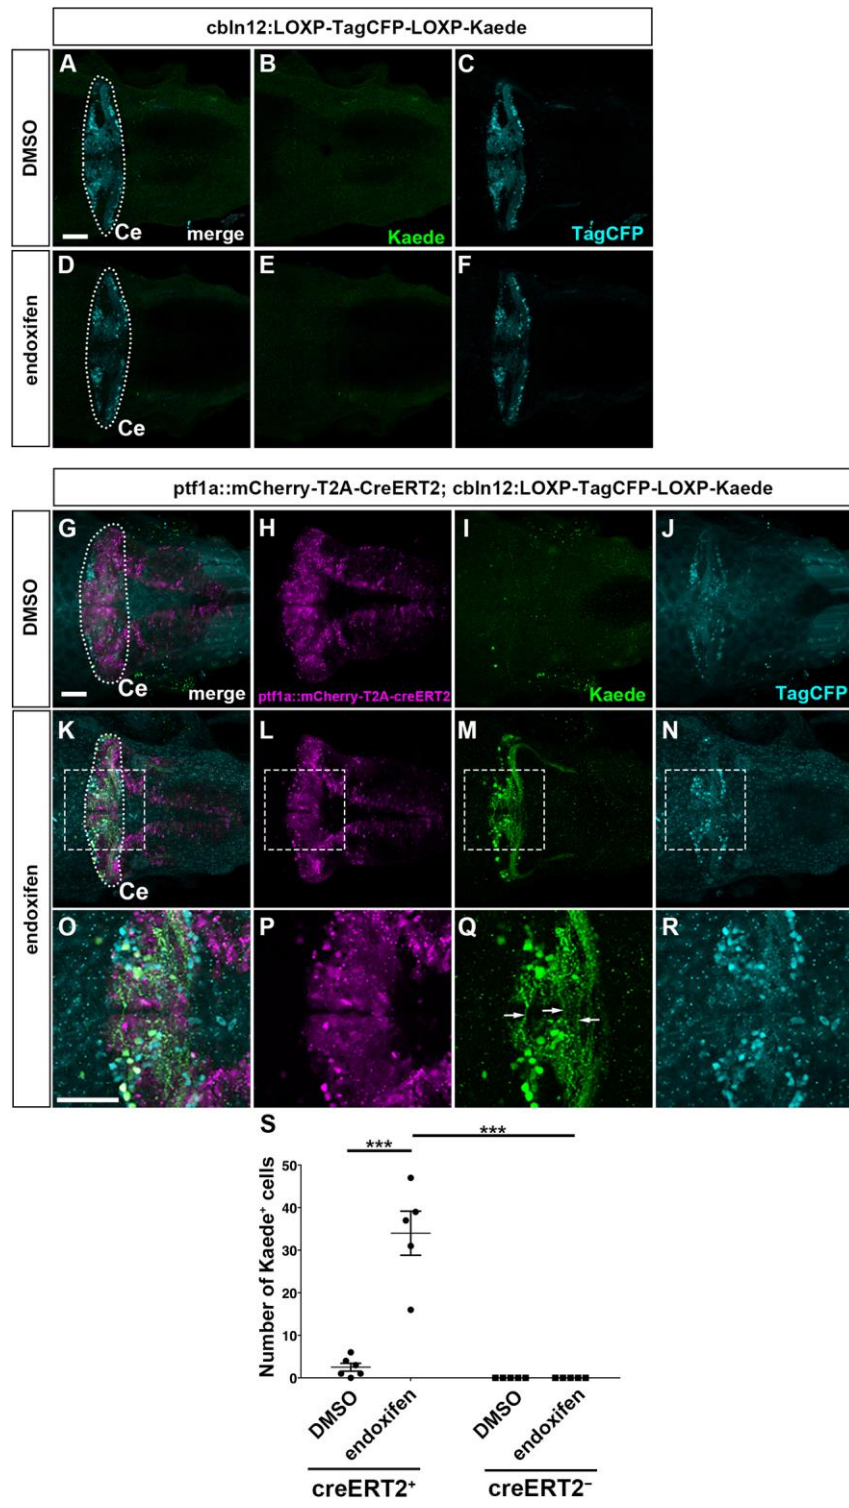



**Fig. 5. Some GCs were also derived from Ptfla-expressing neural progenitors.**

(A-F) Expression of TagCFP (cyan) and Kaede (green) in 5-dpf *Tg(cbln12:LOXP-TagCFP-LOXP-Kaede)* larvae that were treated with DMSO (control,  $n=5$ , A-C) or endoxifen ( $n=5$ , D-F) at 2-dpf. (G-R) Expression of TagCFP and Kaede in 5-dpf *TgBAC(atoh1c:Gal4FF); Tg(UAS-hsp70l:RFP-T2A-CreERT2); Tg(cbln12:LOXP-TagCFP-LOXP-Kaede)* larvae that were treated with DMSO ( $n=6$ , G-J) or endoxifen ( $n=5$ , K-R) at 2 dpf. The larvae were stained with anti-TagCFP (cyan), anti-RFP (magenta), and anti-Kaede (green) antibodies. Dorsal views with anterior to the left. The cerebellum region (Ce) is surrounded by a dotted line. (O-R) Higher magnification views of boxes in (K-N). Arrows indicate parallel fibers of GCs. Scale bars: 50  $\mu\text{m}$  in A (applies to A-F); 50  $\mu\text{m}$  in G (applies to G-N); 50  $\mu\text{m}$  in O (applies to O-R). (S) Number of Kaede<sup>+</sup> cells. \*\*\* $P<0.001$  (two-way ANOVA followed by Bonferroni multiple comparisons). Data are means $\pm$ SE with individual values indicated.

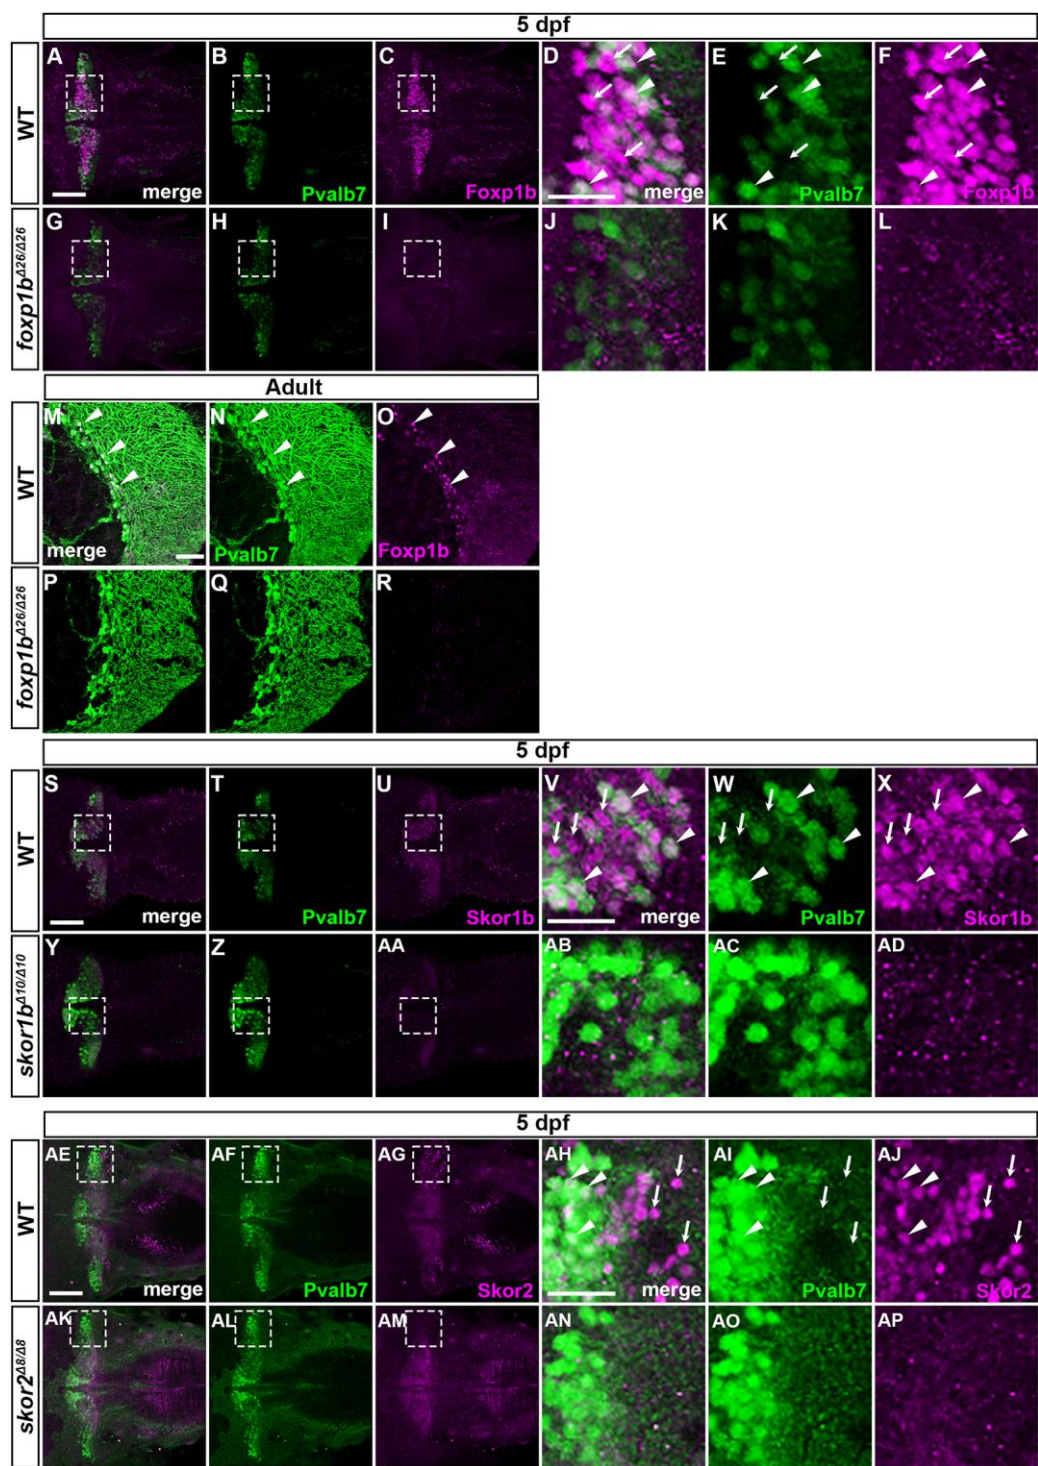

**Fig. 6. Foxp1b, Skor1b, and Skor2 were expressed in differentiating and differentiated PCs.**

(A-R) Localization of Foxp1b. 5-dpf WT ( $n=3$ , A-F) and *foxp1b* mutant larvae ( $n=3$ , G-L), and adult wild-type (WT) ( $n=2$ , M-O) and *foxp1b* mutant ( $n=2$ , P-R) cerebellum sections were immuno-stained with anti-Foxp1b (magenta) and anti-Pvalb7 antibodies (green). Dorsal views with anterior to the left (A-L) and sagittal sections (M-R). (D-F, J-L) Higher magnification views of boxes in (A-C, G-I). Arrowheads and arrows indicate examples of Foxp1b<sup>+</sup> Pvalb7<sup>+</sup> cells and Foxp1b<sup>+</sup> Pvalb7<sup>-</sup> cells, respectively (D-F, M-O). (S-AQ) Localization of Skor1b and Skor2. (S-AD) 5-dpf WT ( $n=3$ , S-X) and *skor1b* mutant larvae ( $n=3$ , Y-AD) were immunostained with anti-Skor1b (magenta) and anti-Pvalb7 antibodies (green). (AE-AP) 5-dpf WT ( $n=2$ , AE-AJ) and *skor2* mutant larvae ( $n=2$ , AK-AP) were immunostained with anti-Skor2 (magenta) and anti-Pvalb7 antibodies (green). Dorsal views with anterior to the left. (V-X, AB-AD, AH-AJ, AN-AP) Higher magnification views of boxes in (S-U, Y-AA, AE-AG, AK-AM). Scale bars: 50  $\mu$ m in A (applies to A-C, G-I); 50  $\mu$ m in D (applies to D-F, J-L); 50  $\mu$ m in M (applies to M-R); 50  $\mu$ m in S (applies to S-U, Y-AA); 50  $\mu$ m in V (applies to V-X, AB-AD); 50  $\mu$ m in AE (applies to AE-AG, AK-AM); 50  $\mu$ m in AH (applies to AH-AJ, AN-AP). Arrowheads indicate examples of Skor1b<sup>+</sup> Pvalb7<sup>+</sup> cells (V-X) and Skor2<sup>+</sup> Pvalb7<sup>+</sup> cells (AH-AJ). Arrows indicate examples of Skor1b<sup>+</sup> Pvalb7<sup>-</sup> cells (V-X) and Skor2<sup>+</sup> Pvalb7<sup>-</sup> cells (AH-AJ).

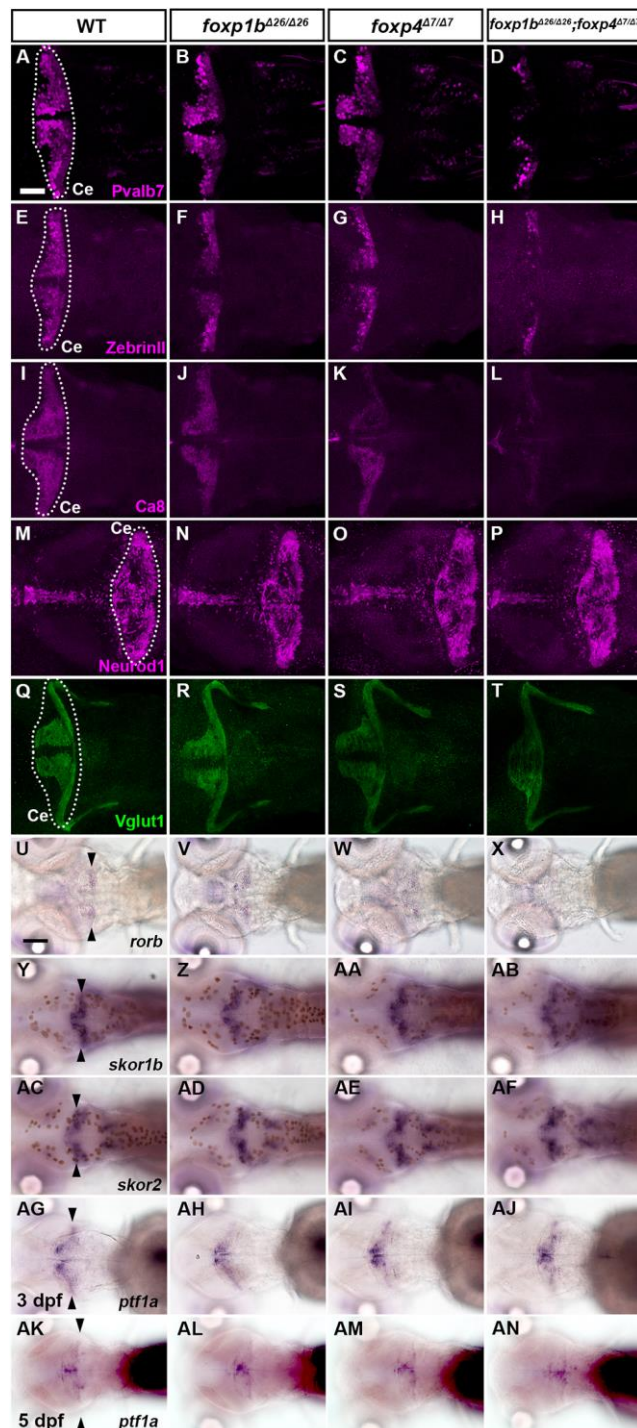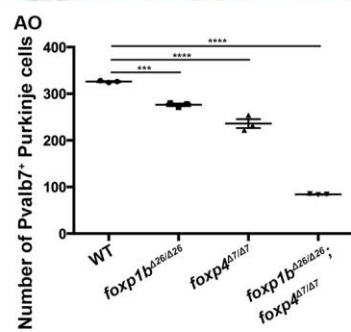

**Fig. 7. Phenotypes of *foxp1b* and *foxp4* mutants.**

(A-T) Expression of PC markers Pvalb7, ZebrinII, and Ca8, and GC markers Neurod1, and Vglut1 in 5-dpf wild-type (WT), *foxp1b*, *foxp4*, and *foxp1b;foxp4* mutant larvae. (U-AB, AG-AJ) Expression of *rorb*, *skor1b*, *skor2* and *ptfla* in 5-dpf WT, *foxp1b*, *foxp4*, and *foxp1b;foxp4* mutant larvae. (AG-AJ) Expression of *ptfla* in 3-dpf WT, *foxp1b*, *foxp4*, and *foxp1b;foxp4* mutant larvae. Data of immunostaining (A-L) and *in situ* hybridization (U-AN). Dorsal views with anterior to the left. The cerebellum region (Ce) is surrounded by a dotted line. Arrowheads indicate expression of genes in the cerebellum. The number of examined larvae and larvae showing each expression pattern is shown in Table 2. Scale bars: 50  $\mu$ m in A (applies to A-T); 100  $\mu$ m in U (applies to U-Z, AA-AN). (AO) Number of Pvalb7<sup>+</sup> PCs in the cerebellum of 5-dpf WT, *foxp1b*, *foxp4*, and *foxp1b;foxp4* mutant larvae. \*\*\* $P$ <0.001, \*\*\*\* $P$ <0.0001 (ANOVA with Tukey's multiple comparison test). Data are means $\pm$ SE with individual values indicated.



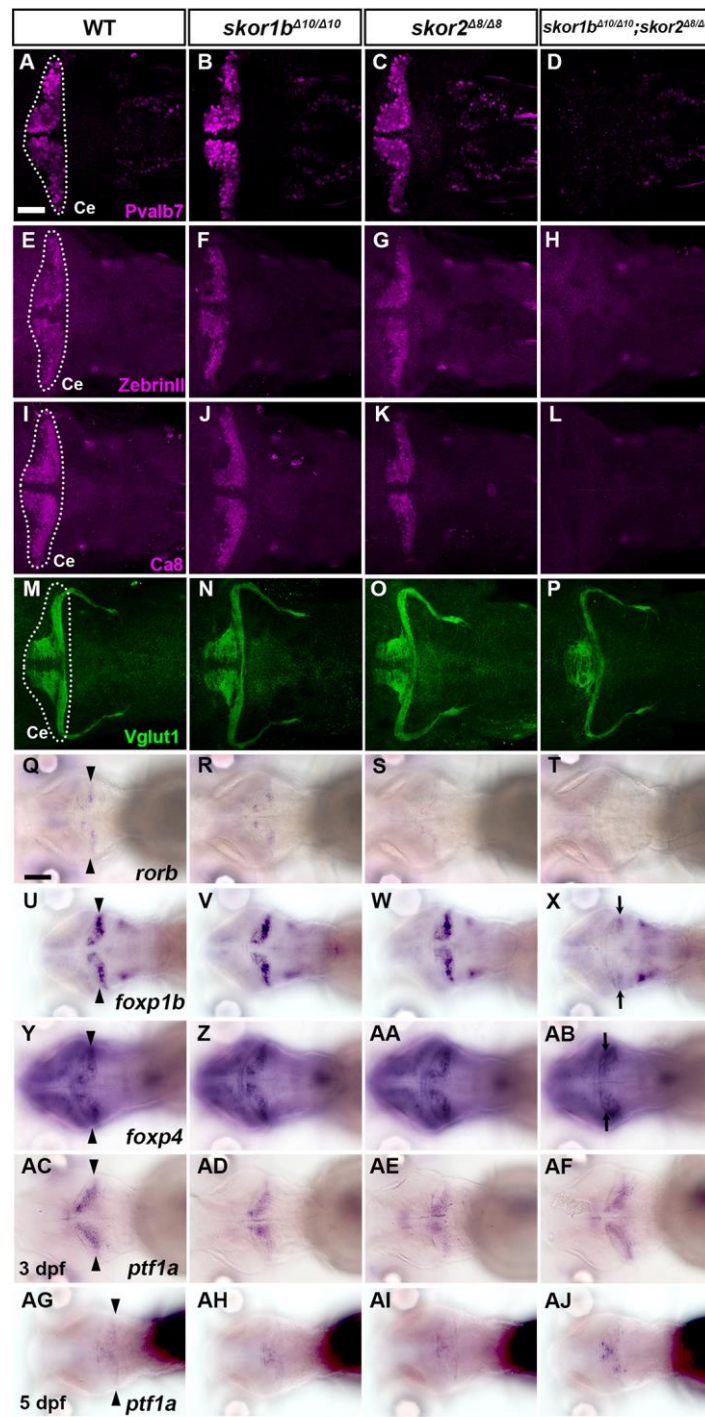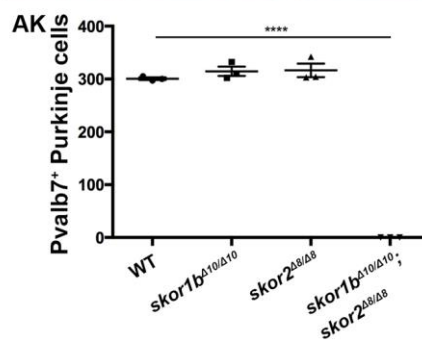

**Fig. 8. Phenotypes of *skor1b* and *skor2* mutants.**

(A-P) Expression of PC markers Pvalb7, ZebrinII, and Ca8, and a GC marker Vglut1 in 5-dpf wild-type (WT), *skor1b*, *skor2*, and *skor1b;skor2* mutant larvae. (Q-AB, AG-AJ) Expression of *rorb*, *foxp1b*, *foxp4* and *ptfla* in 5-dpf WT, *skor1b*, *skor2*, and *skor1b;skor2* mutant larvae. (AC-AF) Expression of *ptfla* in 3-dpf WT, *skor1b*, *skor2*, and *skor1b;skor2* mutant larvae. Data of immunostaining (A-P) and *in situ* hybridization (Q-AJ). Dorsal views with anterior to the left. The cerebellum region (Ce) is surrounded by a dotted line. Arrowheads indicate expression of genes in the cerebellum. Arrows indicate expression of *foxp1b* and *foxp4* in caudal and rostral parts of the cerebellum (X, AB). The number of examined larvae and larvae showing each expression pattern is shown in Table 3. Scale bars: 50  $\mu$ m in A (applies to A-P); 100  $\mu$ m in Q (applies to Q-AJ). (AK) Number of Pvalb7<sup>+</sup> PCs in the cerebellum of 5-dpf WT, *skor1b*, *skor2*, and *skor1b;skor2* mutant larvae. \*\*\*\* $P < 0.0001$  (ANOVA with Tukey's multiple comparison test). Data are means $\pm$ SE with individual values indicated.



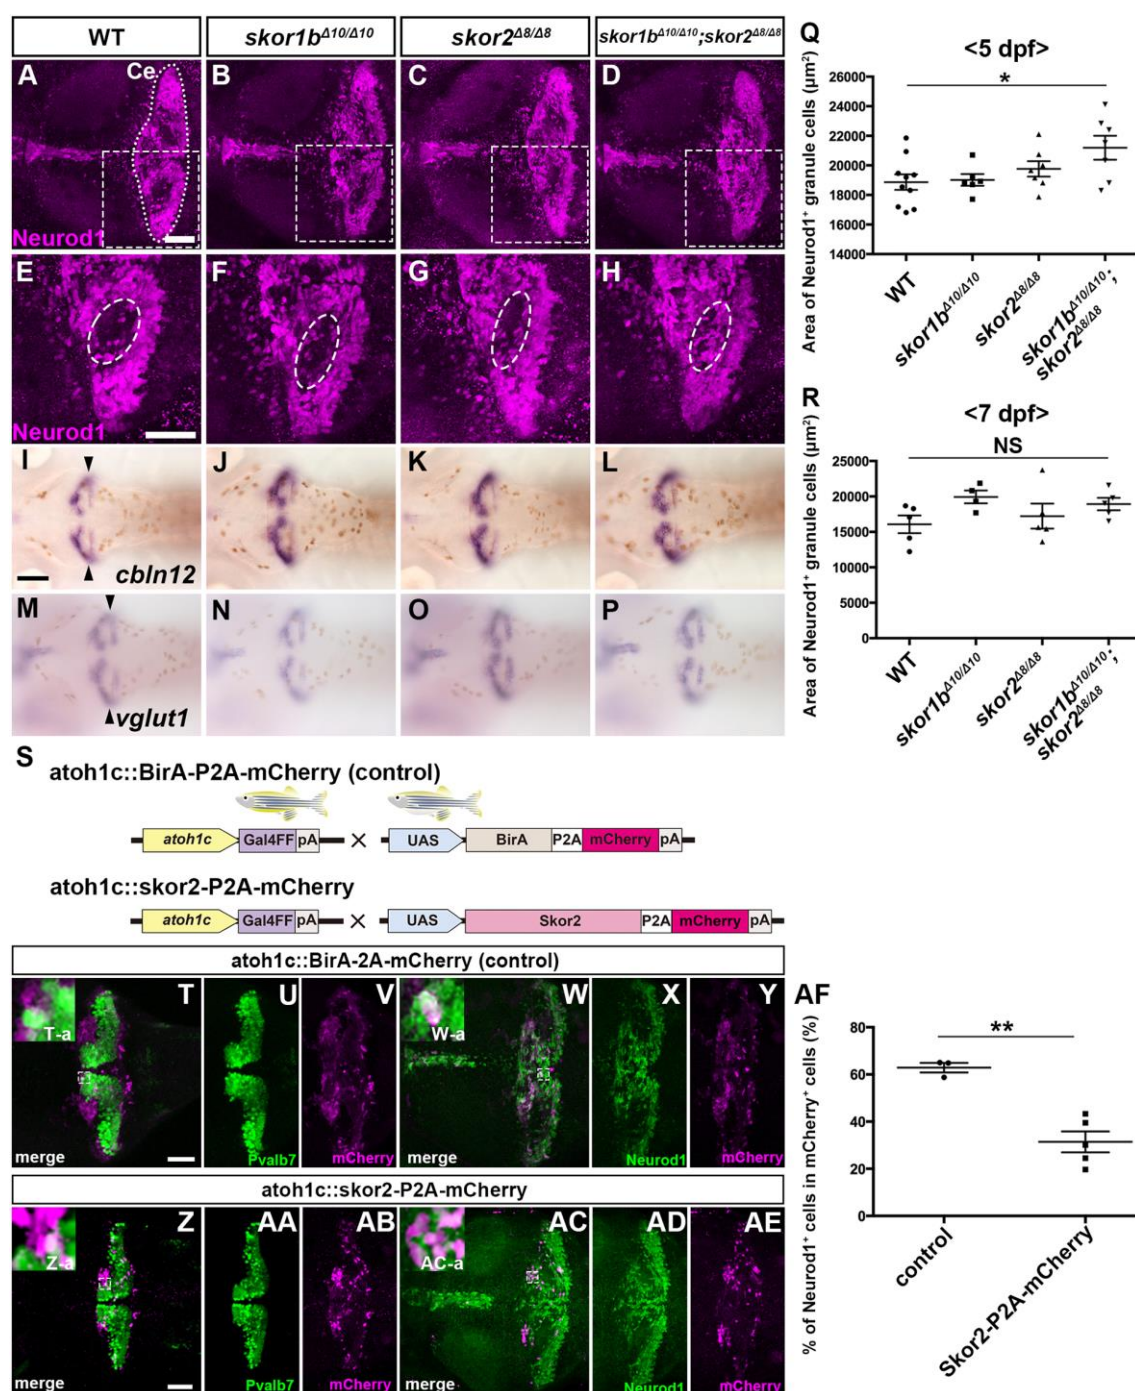

**Fig. 9. Suppression of granule cell fates by Skor1b/2 and Foxp1b/4.**

(A-H) Expression of Neurod1 in 5-dpf wild-type (WT), *skor1b*, *skor2*, and *skor1b*;*skor2* mutant larvae. The cerebellum region is surrounded by a dotted line. (E-H) Higher magnification views of boxes in A-D. Neurod1-expressing GCs were absent in the central areas of the cerebellum (marked by dotted circles) of WT, *skor1b* and *skor2*

mutant larvae, but present in the entire cerebellum of *skor1b;skor2* mutant larvae. (I-P) Expression of mature GC marker genes *cbln12* and *vglut1* in the cerebellum. (Q, R) Area of Neurod1<sup>+</sup> GCs in the cerebellum of 5-dpf (Q) or 7-dpf (R) WT, *skor1b*, *skor2*, and *skor1b;skor2* mutants. \**P*<0.05 (ANOVA with Tukey's multiple comparison test). (S) Diagram of ectopic expression of biotin ligase A (BirA, control) or Skor2 in GC progenitors. (T-AE) Misexpression of Skor2 in *atoh1c*-expressing neural progenitors. 5-dpf *Tg(atoh1c:Gal4FF);Tg(UAS-hsp70l:BirA-P2A-mCherry)* or *Tg(atoh1c:Gal4FF);Tg(UAS:HA-skor2-P2A-mCherry)* larvae, which express BirA/mCherry or Skor2/mCherry in the GC lineage, were immunostained with anti-RFP/mCherry (magenta), and Pvalb7 (green, T-V, Z-AB) or Neurod1 (green, W-Y, AC-AE) antibodies. Dorsal views with anterior to the left (A-P, T-AE). (T-a, W-a, Z-a, AC-a) Higher magnification views of boxed in T, W, Z, and AC. Scale bars: 50 μm in A (applies to A-D); 50 μm in E (applies to E-H); 100 μm in I (applies to I-P); 50 μm in T (applies to T-Y); 50 μm in Z (applies to Z-AE). (AF) Ratios of Neurod1<sup>+</sup> cells in mCherry<sup>+</sup> cells are indicated. \*\**P*<0.01 (Student t-test). Data are means±s.e.m. with individual values indicated (Q, R, AF).

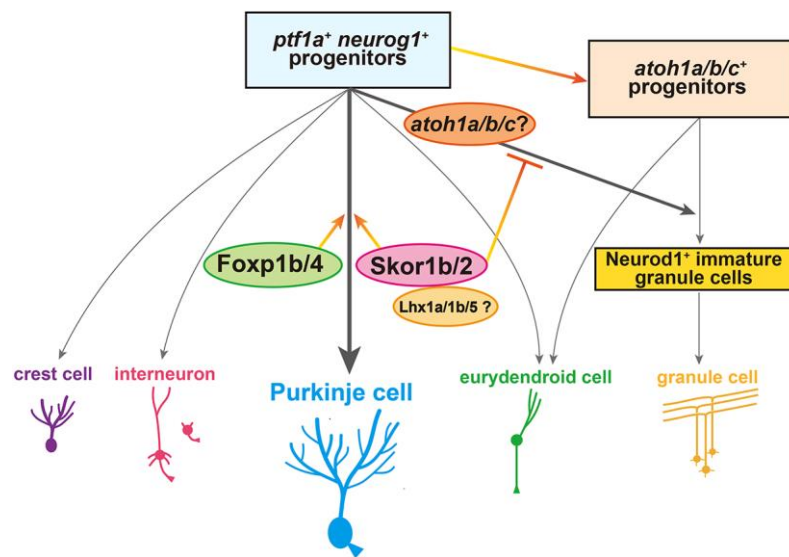

**Fig. 10.** Schematic illustration of a model for neuronal differentiation from Ptf1a/Neurog1-expressing neural progenitors.

**Table 1.** Phenotypic summary of *ptfla* and *neurog1* mutants

| Genotype<br>Marker<br>(stage) | WT                 | <i>neurog1</i> <sup>-/-</sup> | <i>ptfla</i> <sup>Δ4/Δ4</sup> | <i>ptfla</i> <sup>Δ4/Δ4</sup><br>; <i>neurog1</i> <sup>-/-</sup> |
|-------------------------------|--------------------|-------------------------------|-------------------------------|------------------------------------------------------------------|
| Proteins                      |                    |                               |                               |                                                                  |
| Pvalb7 (5 dpf)                | +++<br>(n = 3)     | +++<br>(n = 3)                | ++<br>(n = 3)                 | +<br>(n = 3)                                                     |
| Vglut1 (5 dpf)                | +++<br>(n = 3)     | +++<br>(n = 3)                | ++<br>(n = 3)                 | ++<br>(n = 3)                                                    |
| Pax2 (5 dpf)                  | +++<br>(n = 3)     | +++<br>(n = 3)                | +<br>(n = 3)                  | -<br>(n = 3)                                                     |
| Genes                         |                    |                               |                               |                                                                  |
| <i>atoh1a</i> (3 dpf)         | +++<br>(n = 3)     | +++<br>(n = 3)                | +++<br>(n = 3)                | +++<br>(n = 1)                                                   |
| <i>atoh1a</i> (5 dpf)         | +++<br>(n = 3)     | +++<br>(n = 3)                | ++<br>(n = 3)                 | +<br>(n = 3)                                                     |
| <i>atoh1b</i> (3 dpf)         | +++<br>(n = 2 [3]) | ++<br>(n = 3)                 | +++<br>(n = 3)                | +++<br>(n = 3)                                                   |
| <i>atoh1b</i> (5 dpf)         | +++<br>(n = 3)     | +++<br>(n = 1 [2])            | ++<br>(n = 4)                 | +<br>(n = 3)                                                     |
| <i>atoh1c</i> (3 dpf)         | +++<br>(n = 2)     | +++<br>(n = 4)                | +++<br>(n = 4)                | +++<br>(n = 2)                                                   |
| <i>atoh1c</i> (5 dpf)         | +++<br>(n = 5)     | +++<br>(n = 4)                | +<br>(n = 2)                  | -<br>(n = 2)                                                     |
| <i>olig2</i> (5 dpf)          | +++<br>(n = 4)     | +++<br>(n = 4)                | ++<br>(n = 3)                 | +<br>(n = 4)                                                     |
| <i>vglut2a</i> (5 dpf)        | +++<br>(n = 4)     | +++<br>(n = 3)                | +<br>(n = 4)                  | +<br>(n = 4)                                                     |
| <i>foxp1b</i> (5 dpf)         | +++<br>(n = 1 [4]) | +++<br>(n = 1 [4])            | +<br>(n = 1 [4])              | -<br>(n = 1 [4])                                                 |
| <i>foxp4</i> (5 dpf)          | +++                | +++                           | ++                            | -                                                                |

|                       |                |                |                |              |
|-----------------------|----------------|----------------|----------------|--------------|
|                       | (n = 3)        | (n = 3)        | (n = 3)        | (n = 3)      |
| <i>skor1b</i> (5 dpf) | +++<br>(n = 4) | +++<br>(n = 3) | +<br>(n = 2)   | -<br>(n = 3) |
| <i>skor2</i> (5 dpf)  | +++<br>(n = 3) | +++<br>(n = 3) | +<br>(n = 2)   | +<br>(n = 3) |
| <i>lhx1a</i> (5 dpf)  | +++<br>(n = 2) | ++<br>(n = 3)  | +++<br>(n = 3) | -<br>(n = 3) |
| <i>rorb</i> (5 dpf)   | +++<br>(n = 3) | +++<br>(n = 3) | +<br>(n = 3)   | -<br>(n = 3) |

3 or 5-dpf wild-type (WT), *neurog1*, *ptfla*, or *ptfla;neurog1* mutant larvae were fixed and analyzed by immunostaining with anti-Pvalb7 (PC marker), Vglut1 (GC axon marker), or Pax2 (IN marker) antibodies, or by whole mount *in situ* hybridization of riboprobes. Expression levels are indicated by +++, ++, +, and -. +++ indicates expression comparable to that in WT; ++ indicates weak expression, + indicates strongly reduced expression; - indicates little or no expression. The number of larvae used for the quantification of expression is denoted as 'n'. Additionally, the total number, including larvae that were not used for the quantification but showed the equivalent expression patterns, is indicated in brackets []. The source data are in Table S2.

**Table 2.** Phenotypes of *foxp1b* and *foxp4* mutants

| Genotype<br>Marker<br>(stage) | WT                 | <i>foxp1b</i> <sup>Δ26/Δ26</sup> | <i>foxp4</i> <sup>Δ7/Δ7</sup> | <i>foxp1b</i> <sup>Δ26/Δ26</sup> ;<br><i>foxp4</i> <sup>Δ7/Δ7</sup> |
|-------------------------------|--------------------|----------------------------------|-------------------------------|---------------------------------------------------------------------|
| Proteins                      |                    |                                  |                               |                                                                     |
| Pvalb7 (5 dpf)                | +++<br>(n = 5)     | +++<br>(n = 5)                   | +++<br>(n = 5)                | +<br>(n = 5)                                                        |
| Carbonic anhydrase 8 (5 dpf)  | +++<br>(n = 1 [5]) | ++<br>(n = 1 [5])                | +++<br>(n = 1 [5])            | +<br>(n = 1 [5])                                                    |
| ZebrinII (5 dpf)              | +++<br>(n = 1 [5]) | ++<br>(n = 1 [5])                | ++<br>(n = 1 [5])             | +<br>(n = 1 [5])                                                    |
| Vglut1 (5 dpf)                | +++<br>(n = 5)     | +++<br>(n = 5)                   | +++<br>(n = 5)                | +++<br>(n = 5)                                                      |
| Genes                         |                    |                                  |                               |                                                                     |
| <i>ptf1a</i> (3 dpf)          | +++<br>(n = 2)     | +++<br>(n = 1)                   | +++<br>(n = 3)                | +++<br>(n = 3)                                                      |
| <i>ptf1a</i> (5 dpf)          | +++<br>(n = 3)     | +++<br>(n = 5)                   | +++<br>(n = 2)                | +++<br>(n = 4)                                                      |
| <i>skor1b</i> (5 dpf)         | +++<br>(n = 2)     | +++<br>(n = 3)                   | +++<br>(n = 2)                | +++<br>(n = 3)                                                      |
| <i>skor2</i> (5 dpf)          | +++<br>(n = 2)     | +++<br>(n = 3)                   | +++<br>(n = 3)                | +++<br>(n = 3)                                                      |
| <i>rorb</i> (5 dpf)           | +++<br>(n = 3)     | ++<br>(n = 3)                    | ++<br>(n = 3)                 | -<br>(n = 3)                                                        |
| <i>foxp1b</i> (5 dpf)         | +++<br>(n = 3)     | ++<br>(n = 3)                    | +++<br>(n = 4)                | NA                                                                  |
| <i>foxp4</i> (5 dpf)          | +++<br>(n = 3)     | +++<br>(n = 5)                   | +<br>(n = 3)                  | NA                                                                  |
| <i>gad1b</i> (5 dpf)          | +++<br>(n = 3)     | +++<br>(n = 2)                   | +++<br>(n = 3)                | +<br>(n = 2)                                                        |
| <i>pax2</i> (5 dpf)           | +++                | +++                              | +++                           | +++                                                                 |

|                        |                |                |                |                |
|------------------------|----------------|----------------|----------------|----------------|
|                        | (n = 2)        | (n = 3)        | (n = 3)        | (n = 2)        |
| <i>vglut1</i> (5 dpf)  | +++<br>(n = 3) | +++<br>(n = 2) | +++<br>(n = 4) | +++<br>(n = 2) |
| <i>olig2</i> (5 dpf)   | +++<br>(n = 2) | +++<br>(n = 2) | +++<br>(n = 5) | ++<br>(n = 4)  |
| <i>vglut2a</i> (5 dpf) | +++<br>(n = 4) | +++<br>(n = 5) | +++<br>(n = 2) | +++<br>(n = 2) |

3 or 5-dpf wild-type (WT), *foxp1b*, *foxp4*, or *foxp1b;foxp4* mutant larvae were fixed and analyzed by immunostaining with anti-Pvalb7, Ca8, ZebrinII (PC markers) or anti-Vglut1 (GC axonal marker), or by whole mount *in situ* hybridization of riboprobes. Expression levels are indicated by +++, ++, +, and -. +++ indicates expression comparable to that in WT; ++ indicates weak expression, + indicates strongly reduced expression; - indicates little or no expression. NA, not appreciable. The number of larvae used for the quantification of expression is denoted as 'n'. Additionally, the total number, including larvae that were not used for the quantification but showed the equivalent expression patterns, is indicated in brackets []. The source data are in Table S2.



**Table 3.** Phenotypes of *skor1b* and *skor2* mutants

| Genotype<br>Marker<br>(stage) | WT                 | <i>skor1b</i> <sup>Δ10/Δ10</sup> | <i>skor2</i> <sup>Δ8/Δ8</sup> | <i>skor1b</i> <sup>Δ10/Δ10</sup> ;<br><i>skor2</i> <sup>Δ8/Δ8</sup> |
|-------------------------------|--------------------|----------------------------------|-------------------------------|---------------------------------------------------------------------|
| Proteins                      |                    |                                  |                               |                                                                     |
| Pvalb7 (5 dpf)                | +++<br>(n = 5)     | +++<br>(n = 5)                   | +++<br>(n = 5)                | -<br>(n = 5)                                                        |
| Ca 8 (5 dpf)                  | +++<br>(n = 1 [5]) | ++<br>(n = 2 [5])                | +<br>(n = 2 [5])              | -<br>(n = 2 [5])                                                    |
| ZebrinII (5 dpf)              | +++<br>(n = 2 [5]) | +++<br>(n = 2 [5])               | +++<br>(n = 2 [5])            | -<br>(n = 2 [5])                                                    |
| Vglut1 (5 dpf)                | +++<br>(n = 3)     | +++<br>(n = 3)                   | +++<br>(n = 3)                | +++<br>(n = 3)                                                      |
| Neurod1 (5 dpf)               | +++<br>(n = 10)    | +++<br>(n = 6)                   | +++<br>(n = 7)                | ++++<br>(n = 7)                                                     |
| Genes                         |                    |                                  |                               |                                                                     |
| <i>ptfla</i> (3 dpf)          | +++<br>(n = 3)     | +++<br>(n = 3)                   | +++<br>(n = 3)                | +++<br>(n = 2)                                                      |
| <i>ptfla</i> (5 dpf)          | +++<br>(n = 3)     | +++<br>(n = 4)                   | +++<br>(n = 1)                | +++<br>(n = 3)                                                      |
| <i>rorb</i> (5 dpf)           | +++<br>(n = 3)     | ++<br>(n = 2)                    | +++<br>(n = 2)                | -<br>(n = 3)                                                        |
| <i>skor1b</i> (5 dpf)         | +++<br>(n = 3)     | ++<br>(n = 2)                    | +++<br>(n = 3)                | NA                                                                  |
| <i>skor2</i> (5 dpf)          | +++<br>(n = 3)     | +++<br>(n = 3)                   | +++<br>(n = 3)                | NA                                                                  |
| <i>foxp1b</i> (5 dpf)         | +++<br>(n = 2)     | +++<br>(n = 2)                   | +++<br>(n = 2)                | ++<br>(n = 2)                                                       |
| <i>foxp4</i> (5 dpf)          | +++<br>(n = 3)     | +++<br>(n = 3)                   | +++<br>(n = 3)                | +++ *<br>(n = 2)                                                    |

|                        |                |                |                |                    |
|------------------------|----------------|----------------|----------------|--------------------|
| <i>atoh1a</i> (3 dpf)  | +++<br>(n = 3) | ++<br>(n = 2)  | +++<br>(n = 3) | +++<br>(n = 3)     |
| <i>atoh1a</i> (5 dpf)  | +++<br>(n = 2) | +++<br>(n = 1) | ++<br>(n = 3)  | +++<br>(n = 4)     |
| <i>atoh1b</i> (3 dpf)  | +++<br>(n = 3) | +++<br>(n = 3) | ++<br>(n = 3)  | +++<br>(n = 1)     |
| <i>atoh1b</i> (5 dpf)  | +++<br>(n = 2) | +++<br>(n = 3) | ++<br>(n = 2)  | +++<br>(n = 1)     |
| <i>atoh1c</i> (3 dpf)  | +++<br>(n = 3) | +++<br>(n = 3) | +++<br>(n = 3) | +++<br>(n = 2)     |
| <i>atoh1c</i> (5 dpf)  | +++<br>(n = 2) | +++<br>(n = 1) | +++<br>(n = 1) | +++<br>(n = 3)     |
| <i>gad1b</i> (5 dpf)   | +++<br>(n = 2) | +++<br>(n = 3) | +++<br>(n = 3) | +++<br>(n = 1)     |
| <i>pax2</i> (5 dpf)    | +++<br>(n = 3) | +++<br>(n = 1) | +++<br>(n = 3) | +++<br>(n = 1 [3]) |
| <i>vglut1</i> (5 dpf)  | +++<br>(n = 3) | +++<br>(n = 3) | +++<br>(n = 3) | +++<br>(n = 3)     |
| <i>cbln12</i> (5 dpf)  | +++<br>(n = 1) | +++<br>(n = 2) | +++<br>(n = 3) | +++<br>(n = 1 [4]) |
| <i>pax6a</i> (5 dpf)   | +++<br>(n = 3) | +++<br>(n = 3) | +++<br>(n = 3) | +++<br>(n = 1)     |
| <i>reln</i> (5 dpf)    | +++<br>(n = 2) | +++<br>(n = 1) | +++<br>(n = 3) | +++<br>(n = 2)     |
| <i>olig2</i> (5 dpf)   | +++<br>(n = 3) | +++<br>(n = 3) | +++<br>(n = 3) | +++<br>(n = 3)     |
| <i>vglut2a</i> (5 dpf) | +++<br>(n = 3) | +++<br>(n = 1) | +++<br>(n = 3) | +++<br>(n = 2)     |

3 or 5-dpf wild-type (WT), *skor1b*, *skor2*, or *skor1b;skor2* mutant larvae were fixed and analyzed by immunostaining with anti-Pvalb7, Ca8, ZebrinII (PC markers) or anti-Vglut1 (GC axonal marker), or by

whole mount *in situ* hybridization of riboprobes. Expression levels are indicated by +++, ++, +, and -. +++ indicates expressing cells more than those in WT; ++ indicates expression comparable to that in WT; + indicates weak expression, - indicates strongly reduced expression; - indicates little or no expression. NA, not appreciable. \* Expression was detected in GCs in the rostral part of the cerebellum (corpus cerebelli). The number of larvae used for the quantification of expression is denoted as 'n'. Additionally, the total number, including larvae that were not used for the quantification but showed the equivalent expression patterns, is indicated in brackets []. The source data are in Table S2.

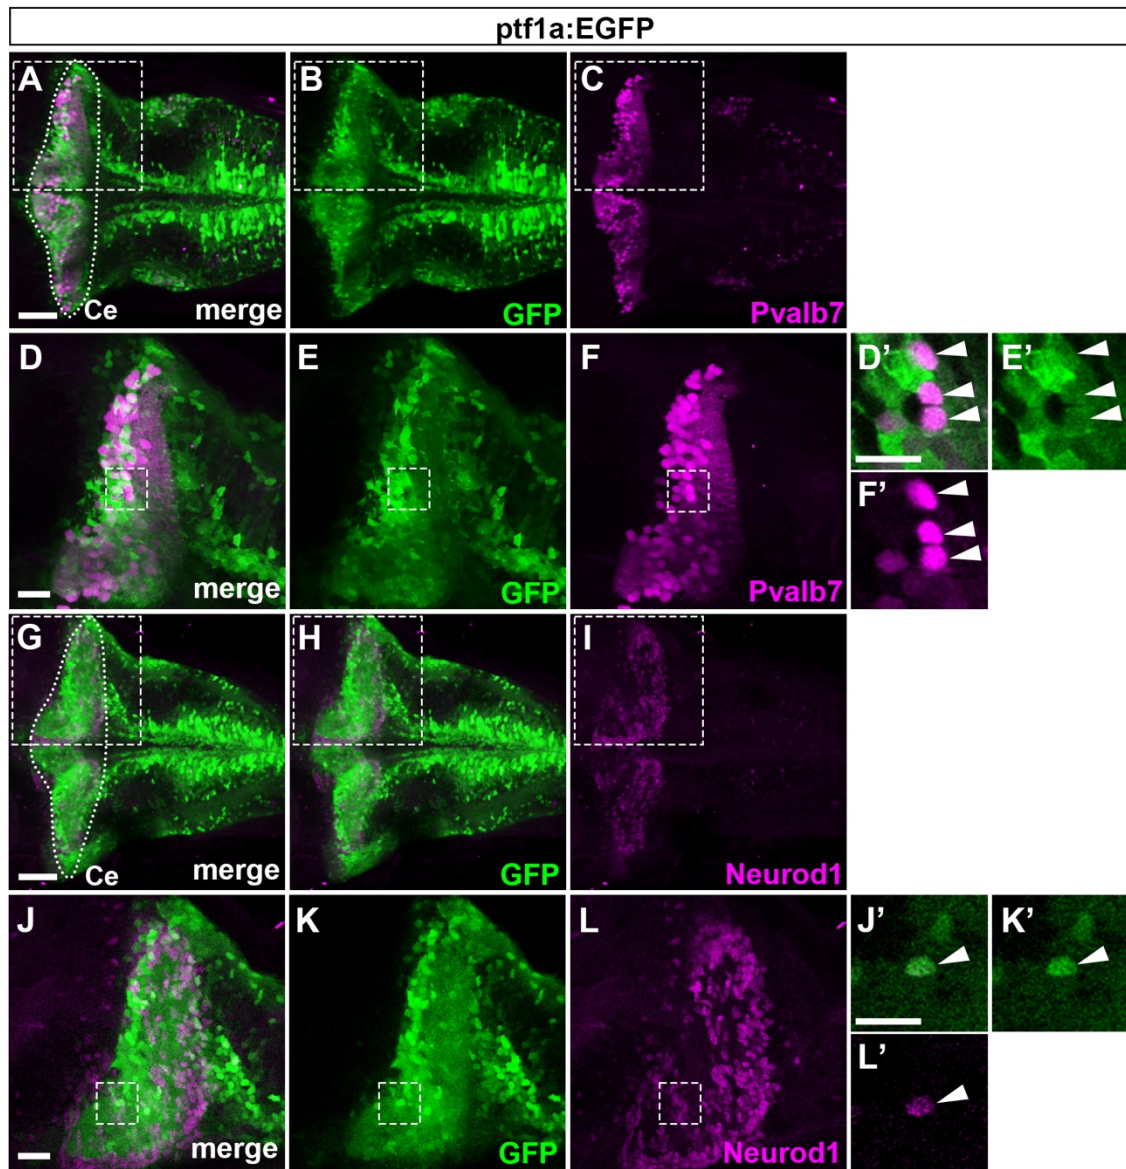

**Fig. S1. Expression of GFP in *TgBAC(ptf1a:GFP)*.**

5-dpf *TgBAC(ptf1a:GFP)* larvae were stained with anti-GFP, and anti-Pvalb7 ( $n=3$ , A-F) or Neurod1 ( $n=2$ , G-L) antibodies. (D'-F', J'-L') Higher magnification views of boxes in (D-F, J-L). Dorsal views with anterior to the left. The cerebellum region (Ce) is surrounded by a dotted line. Many *ptf1a:GFP*<sup>+</sup> cells were co-stained with Pvalb7 (D, arrowheads in D'-F') and a few *ptf1a:GFP*<sup>+</sup> cells were co-stained with Neurod1 (J, arrowhead in J'-L'). In one half of the cerebellum, one larva had 14 *GFP*<sup>+</sup> cells out of 225 *Neurod1*<sup>+</sup> cells, the other had 14 *GFP*<sup>+</sup> cells out of 206 *Neurod1*<sup>+</sup> cells. Scale bars: 50  $\mu$ m in A (applies to A-C); 20  $\mu$ m in D (applies to D-F); 50  $\mu$ m in G (applies to G-I); 20  $\mu$ m in J (applies to J-L); 10  $\mu$ m in D' (applies to D'-F'); 10  $\mu$ m in J' (applies to J'-L').

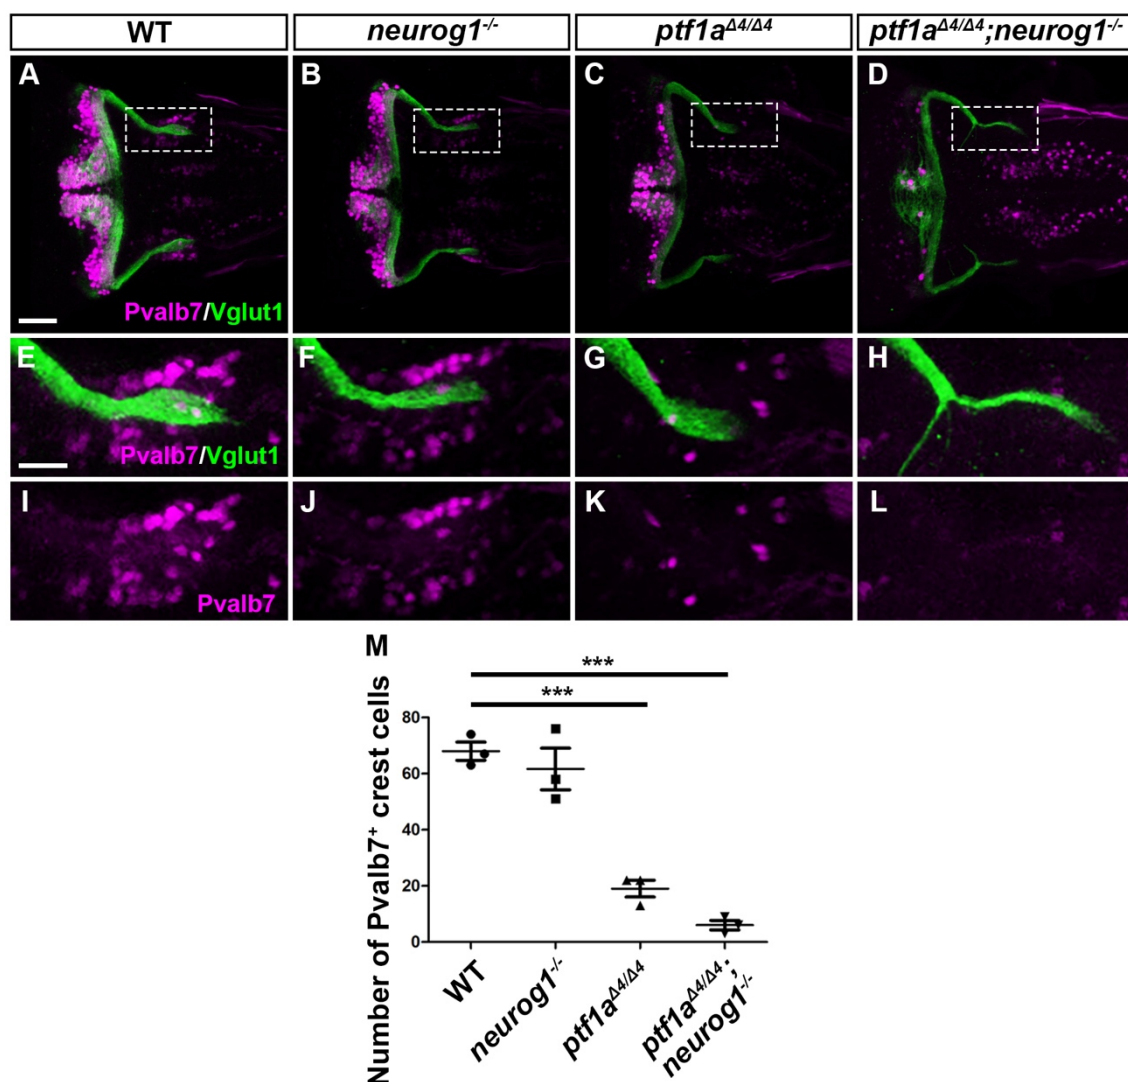

**Fig. S2. Crest cells in *neurog1*, *ptfla*, *ptfla*; *neurog1* mutants.**

5-dpf wild-type (WT), *neurog1*, *ptfla*, and *ptfla*; *neurog1* mutant larvae were immunostained with anti-Pvalb7 (magenta) and Vglut1 (green) antibodies. Dorsal views with anterior to the left. (E-H) Higher magnification views of boxes in A-D. (I-L) Only Pvalb7 expression in E-H is shown. Scale bars: 50  $\mu$ m in A (applies to A-D); 20  $\mu$ m in E (applies to E-L). (M) Number of Pvalb7<sup>+</sup> crest cells in 5-dpf WT, *neurog1*, *ptfla*, and *ptfla*; *neurog1* mutant larvae. \*\*\**P* < 0.001 (ANOVA with Tukey's multiple comparison test). Data are means  $\pm$  SE with individual values indicated.



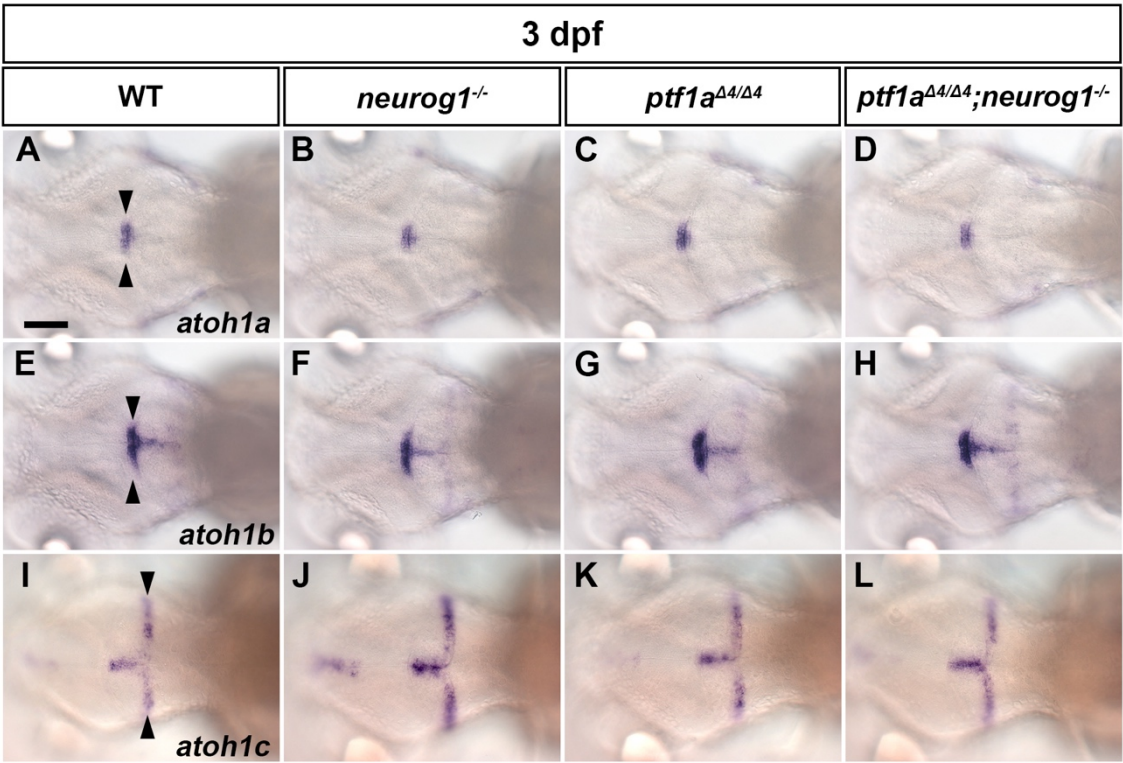

**Fig. S3. Expression of *atoh1* genes in *neurog1*, *ptf1a*, *ptf1a*; *neurog1* mutants.** Expression of *atoh1a*, *atoh1b*, and *atoh1c* in 3-dpf WT, *neurog1*, *ptf1a*, and *ptf1a*; *neurog1* mutant larvae. Data of *in situ* hybridization. Dorsal views with anterior to the left. The number of examined larvae is shown in Table 1. Scale bar: 100 μm in A (applies to all panels).

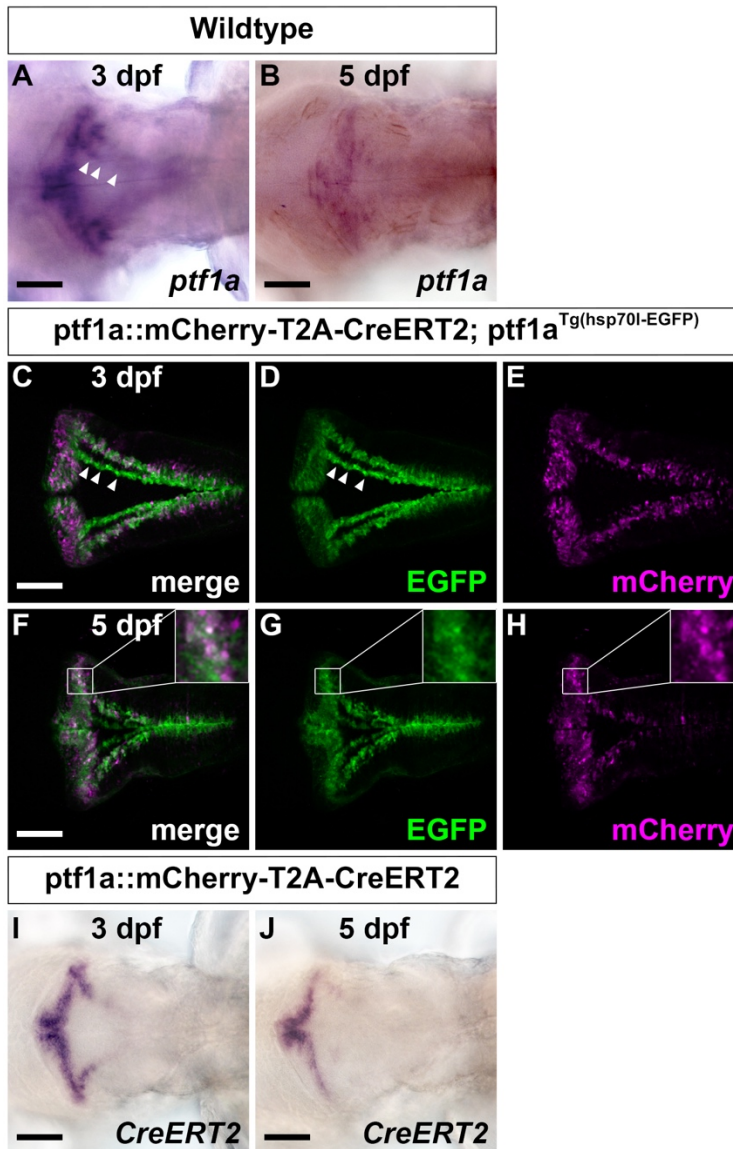

**Fig. S4. CreERT2 expression in *ptf1a*-expressing neural progenitors in the lineage-tracing line.**

(A, B) *ptf1a* expression at 3 and 5 dpf. (C-H) mCherry expression (magenta) in *TgBAC(ptf1a:Gal4-VP16);Tg(UAS-hsp70l:mCherry-T2A-CreERT2)* and EGFP expression (green) in *ptf1a<sup>Tg(hsp70l-EGFP)</sup>* larvae at 3 and 5 dpf. The insets of F-H provide a higher magnification view of the boxed area in the corresponding figures. (I, J) *CreERT2* expression at 3 and 5 dpf. Note that EGFP expression in *ptf1a<sup>Tg(hsp70l-EGFP)</sup>* larvae recapitulated *ptf1a* expression. mCherry was expressed in EGFP-expressing cells except those located medially (ventrally) in the hindbrain (marked by arrowheads) and recapitulated *CreERT2* expression. Scale bars: 100  $\mu$ m in A; B; C (applies to C-E); F (applies to F-H); I; J.



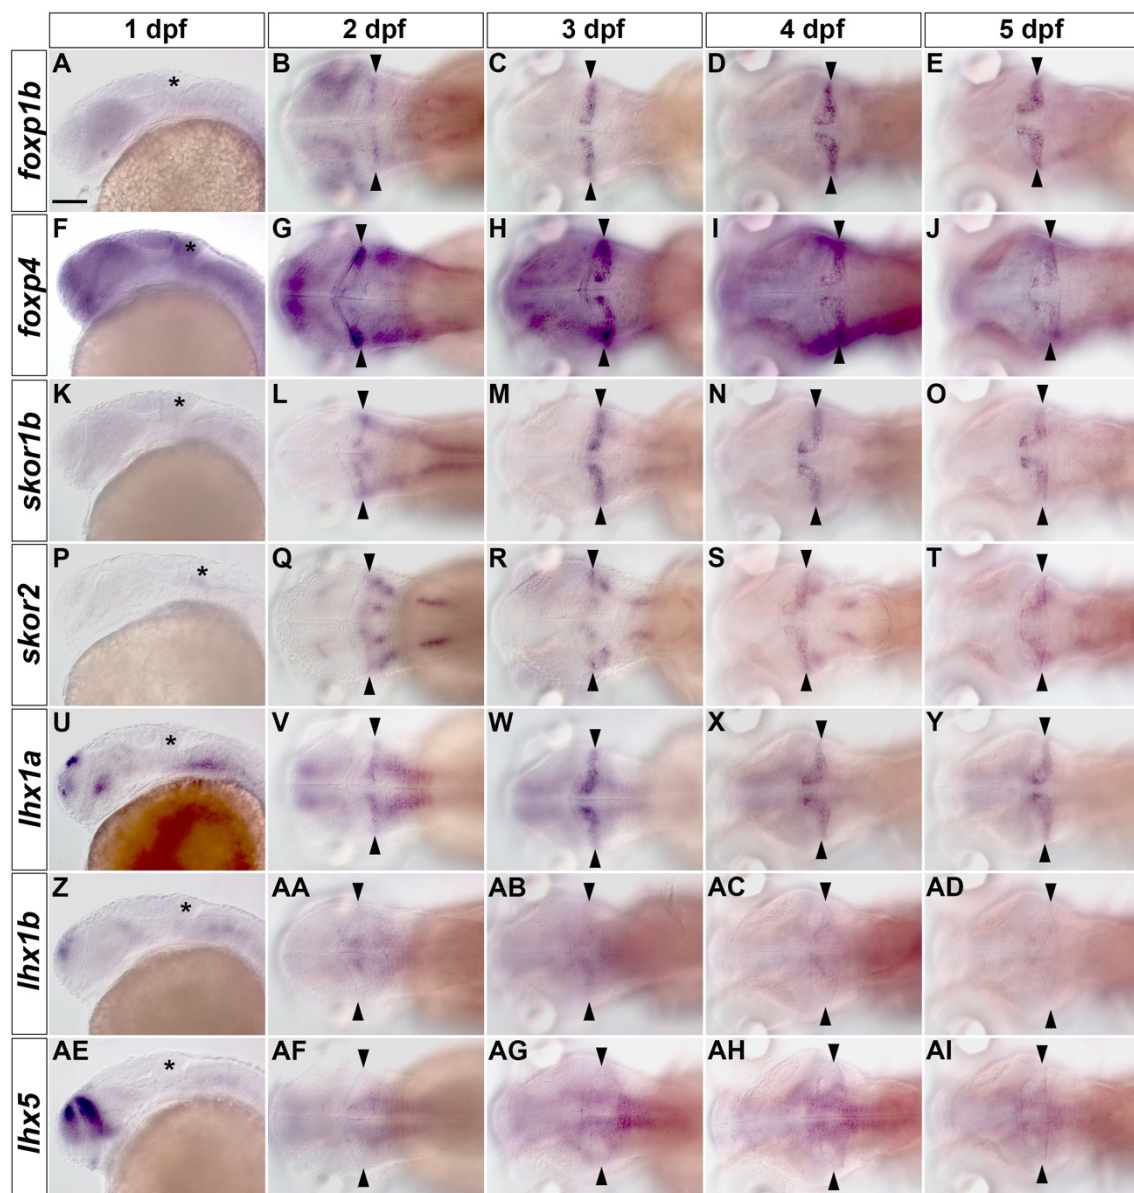

**Fig. S5. Expression of *foxp*, *skor*, and *lhx*-family genes during development.**

Expression of *foxp1b* (A-E), *foxp4* (F-J), *skor1b* (K-O), *skor2* (P-T), *lhx1a* (U-Y), *lhx1b* (Z-AD), and *lhx5* (AE-AI) in the cerebellum region at 1, 2, 3, 4, and 5 dpf. Lateral views with anterior to the left (A, F, K, P, U, Z, AE). Dorsal views with anterior to the left (B-E, G-J, L-O, Q-T, V-Y, AA-AD, AF-AI). The cerebellum region is marked by asterisks or arrowheads. Scale bar: 100  $\mu$ m in A (applies to all panels).

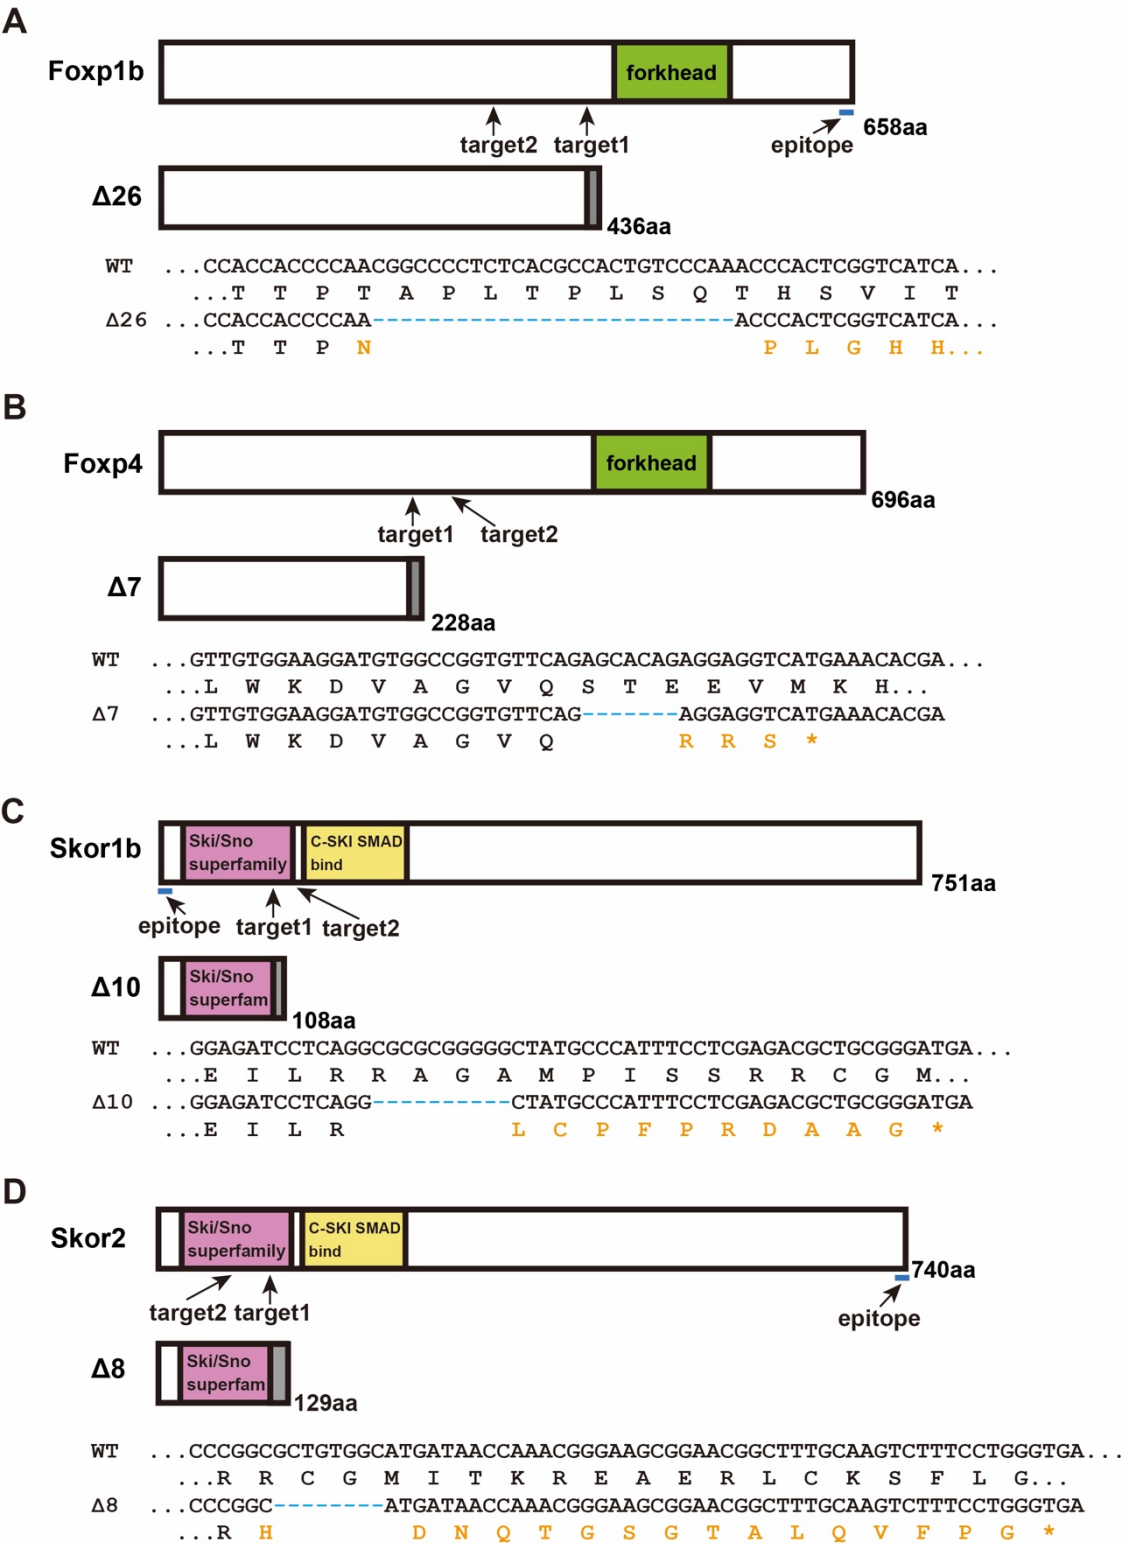

Fig. S6. Structure of wild-type (WT) and mutant Foxp1b, Foxp4, Skor1b, and Skor2.

Structure of WT and mutant Foxp1b (A), Foxp4 (B), Skor1b (C), and Skor2 (D), and nature of mutations generated by the CRISPR/Cas9 method. The positions of the CRISPR/Cas9 targets are shown. Target 1 is the target when creating stable mutants, and target 2 is the target when creating crispants. The deletion is marked in blue. The deletion mutations in these genes cause a frameshift, the addition of unrelated amino acids (marked in gray), and a premature stop codon. The mutation of *foxp1b*, *foxp4*, *skor1b* and *skor2* results in the addition of 42, 3, 10, and 16 unrelated amino acids, respectively (marked in orange). All of the putative mutant proteins lack the functional domain(s) conserved among the Foxp- or Skor-family proteins. Foxp1b and Foxp4 have a forkhead domain. Skor1b and Skor2 have a Ski/Sno superfamily domain and a c-SKI SMAD binding domain, respectively. The positions of the epitope used as the antigen for the antibodies produced in this study are also indicated.

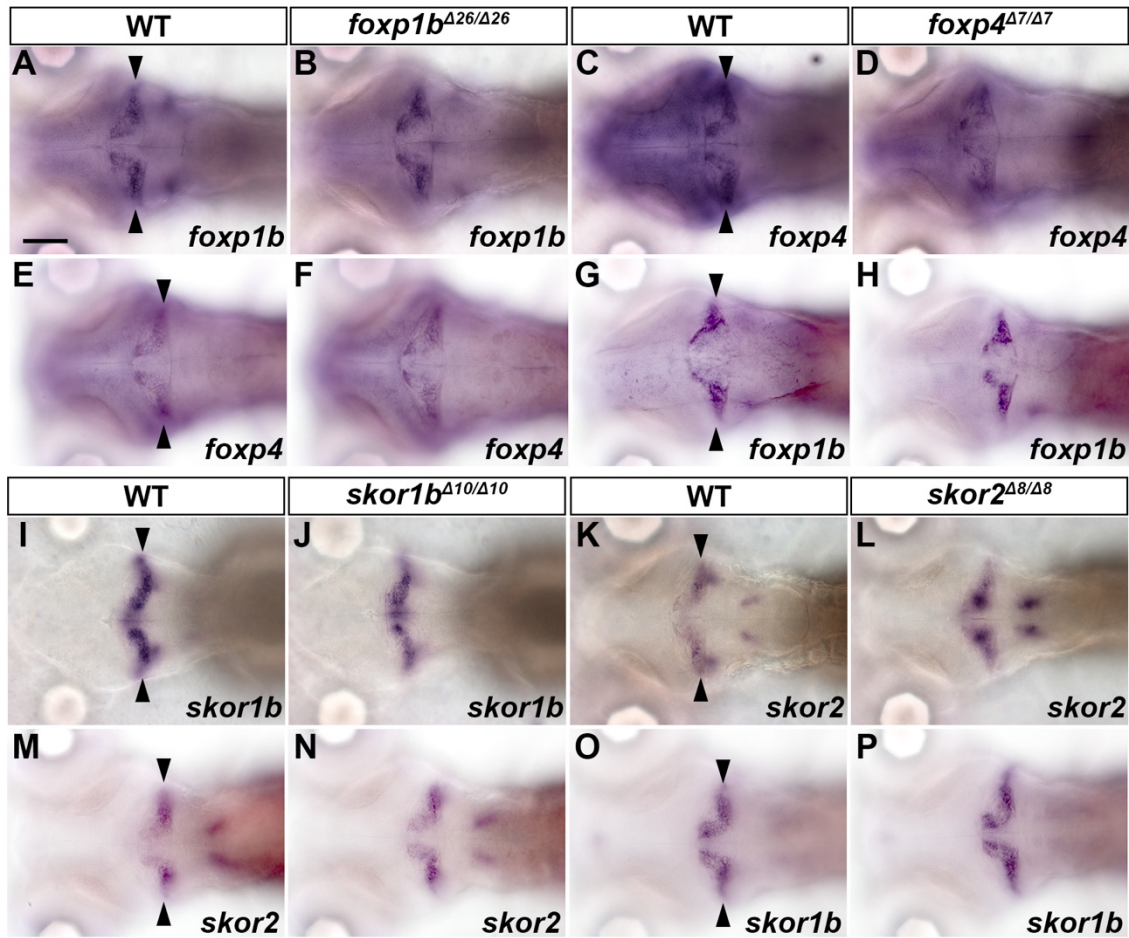

**Fig. S7. Expression of *foxp1b*, *foxp4*, *skor1b*, and *skor2* in *foxp1b*, *foxp4*, *skor1b*, and *skor2* mutants.**

(A, B) Expression of *foxp1b* in 5-dpf WT ( $n = 3$ ) and *foxp1b* <sup>$\Delta 26/\Delta 26$</sup>  ( $n = 3$ ) mutant larvae. (C, D) Expression of *foxp4* in 5-dpf WT ( $n = 3$ ) and *foxp4* <sup>$\Delta 7/\Delta 7$</sup>  ( $n = 3$ ) mutant larvae. (E, F) Expression of *foxp4* in 5-dpf WT ( $n = 5$ ) and *foxp1b* <sup>$\Delta 26/\Delta 26$</sup>  ( $n = 5$ ) mutant larvae. (G, H) Expression of *foxp1b* in 5-dpf WT ( $n = 4$ ) and *foxp4* <sup>$\Delta 7/\Delta 7$</sup>  ( $n = 4$ ) mutant larvae. (I, J) Expression of *skor1b* in 5-dpf WT ( $n = 3$ ) and *skor1b* <sup>$\Delta 10/\Delta 10$</sup>  ( $n = 3$ ) mutant larvae. (K, L) Expression of *skor2* in 5-dpf WT ( $n = 3$ ) and *skor2* <sup>$\Delta 8/\Delta 8$</sup>  ( $n = 3$ ) mutant larvae. (M, N) Expression of *skor2* in 5-dpf WT ( $n = 6$ ) and *skor1b* <sup>$\Delta 10/\Delta 10$</sup>  ( $n = 3$ ) mutant larvae. (O, P) Expression of *skor1b* in 5-dpf WT ( $n = 3$ ) and *skor2* <sup>$\Delta 8/\Delta 8$</sup>  ( $n = 3$ ) mutant larvae. The cerebellum region is marked by arrowheads. Scale bar: 100  $\mu$ m in A (applies to all panels).



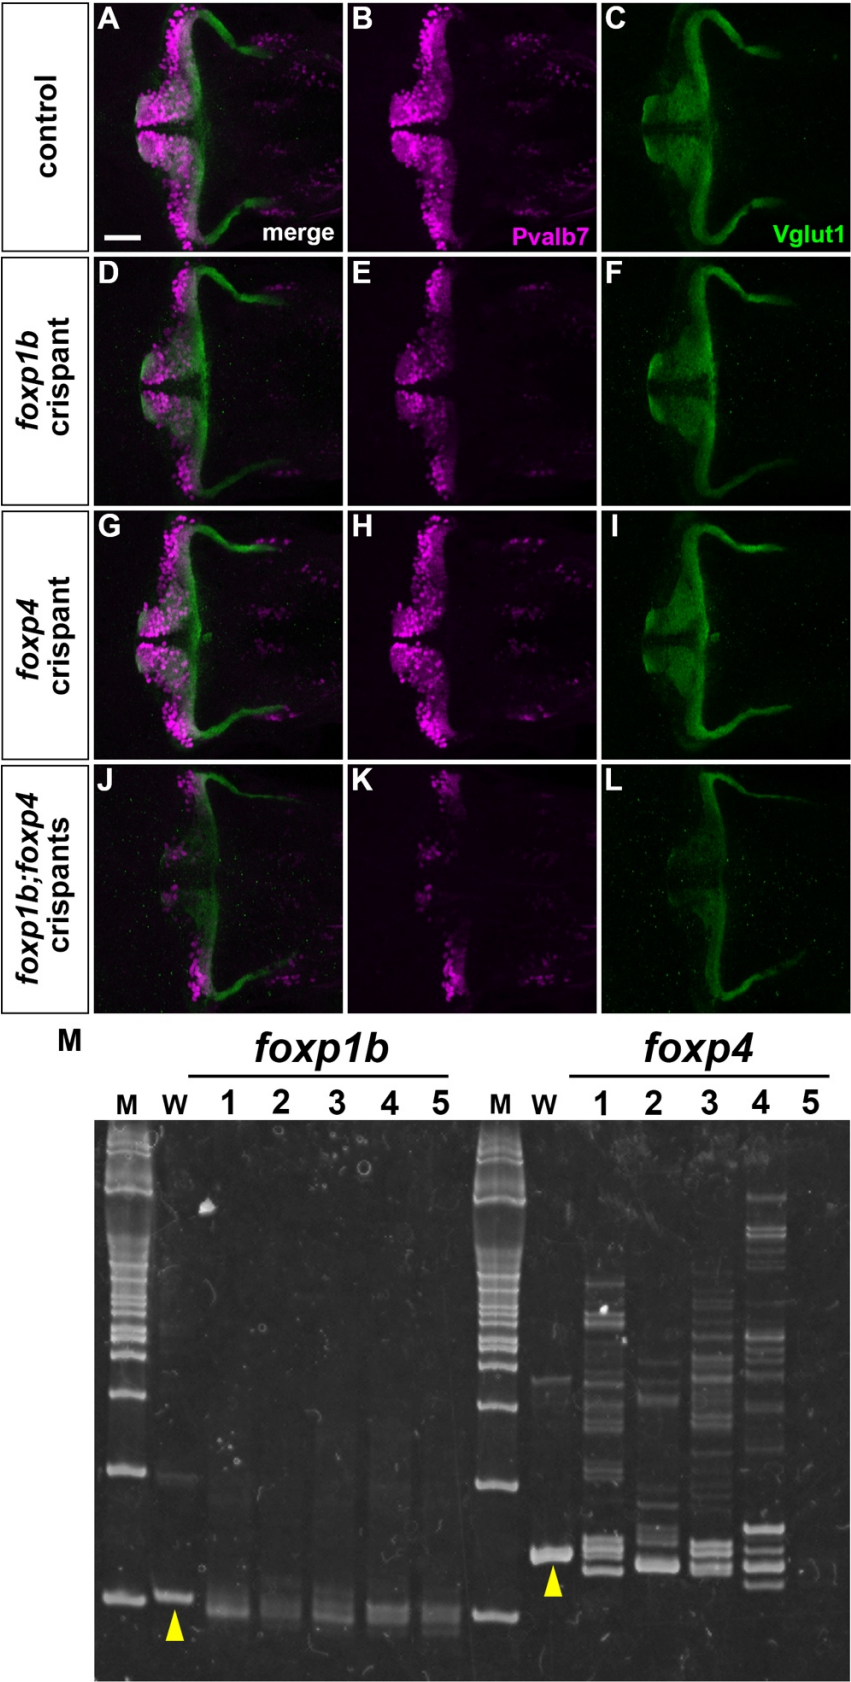

**Fig. S8. Phenotypes of *foxp1b* and *foxp4* crispants.**

(A-L) Expression of PC marker Pvalb7 (magenta) and GC marker Vglut1 (green) in 5-dpf control (n = 5), *foxp1b* (n = 5), *foxp4* (n = 5), and *foxp1b;foxp4* (n = 5) crispants, which received injection of Cas9 protein, tracrRNA, and *foxp1b*, *foxp4*, or a combination of *foxp1b* and *foxp4* crRNAs. Note that while expression of Pvalb7 was not affected in *foxp1b* or *foxp4* crispants, it was strongly reduced in *foxp1b;foxp4* crispants. Dorsal views with anterior to the left. Scale bar: 50  $\mu$ m in A (applies to A-L). (M) Genotyping of *foxp1b;foxp4* crispants. CRISPR/Cas9-target genomic regions were amplified from five 5-dpf *foxp1b;foxp4* crispants by PCR and separated on an acrylamide gel. Note that the crispant larvae had various insertion/deletion (in/del) mutations in their target DNA. Yellow arrows indicated wild-type control PCR products.

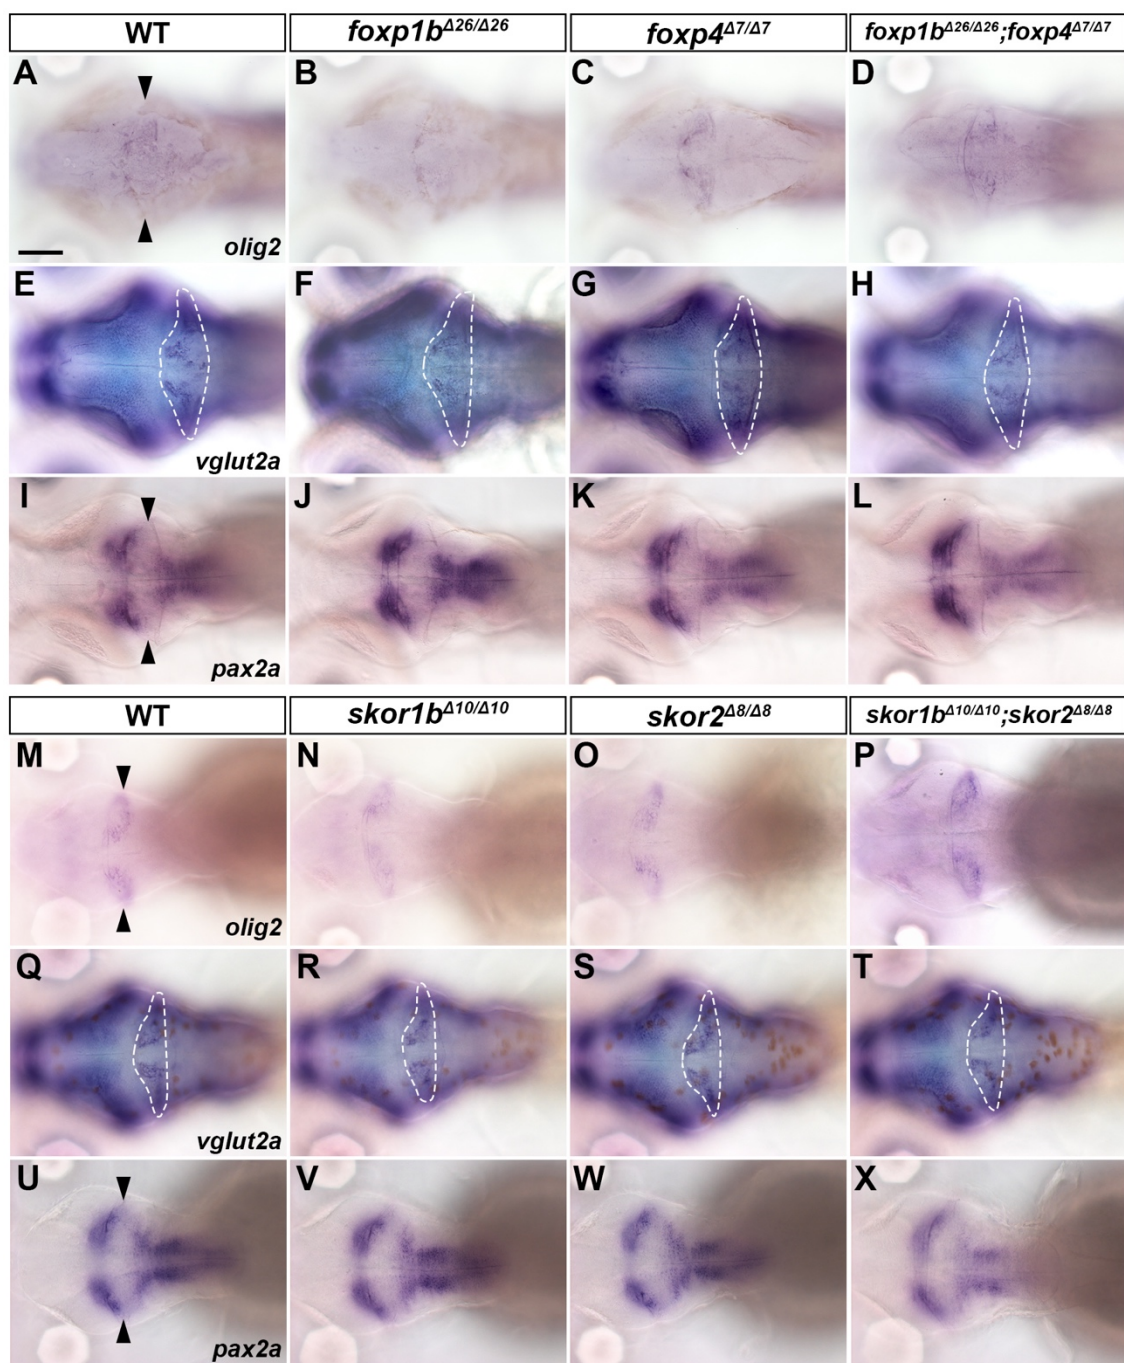

**Fig. S9. Expression of *olig2*, *vglut2a*, and *pax2a* in *foxp* and *skor* mutants.**

Expression of *olig2* (A-D, M-P), *vglut2a* (E-H, Q-T), and *pax2a* (I-L, U-X) in 5-dpf WT, *foxp1b*<sup>Δ26/Δ26</sup>, *foxp4*<sup>Δ7/Δ7</sup>, and *foxp1b*<sup>Δ26/Δ26</sup>;*foxp4*<sup>Δ7/Δ7</sup> mutant larvae (A-L), and WT, *skor1b*<sup>Δ10/Δ10</sup>, *skor2*<sup>Δ8/Δ8</sup>, and *skor1b*<sup>Δ10/Δ10</sup>;*skor2*<sup>Δ8/Δ8</sup> mutant larvae (M-X). The cerebellum region is surrounded or marked by a dotted line and arrowheads, respectively. Scale bars: 100 μm in A (applies to all panels).



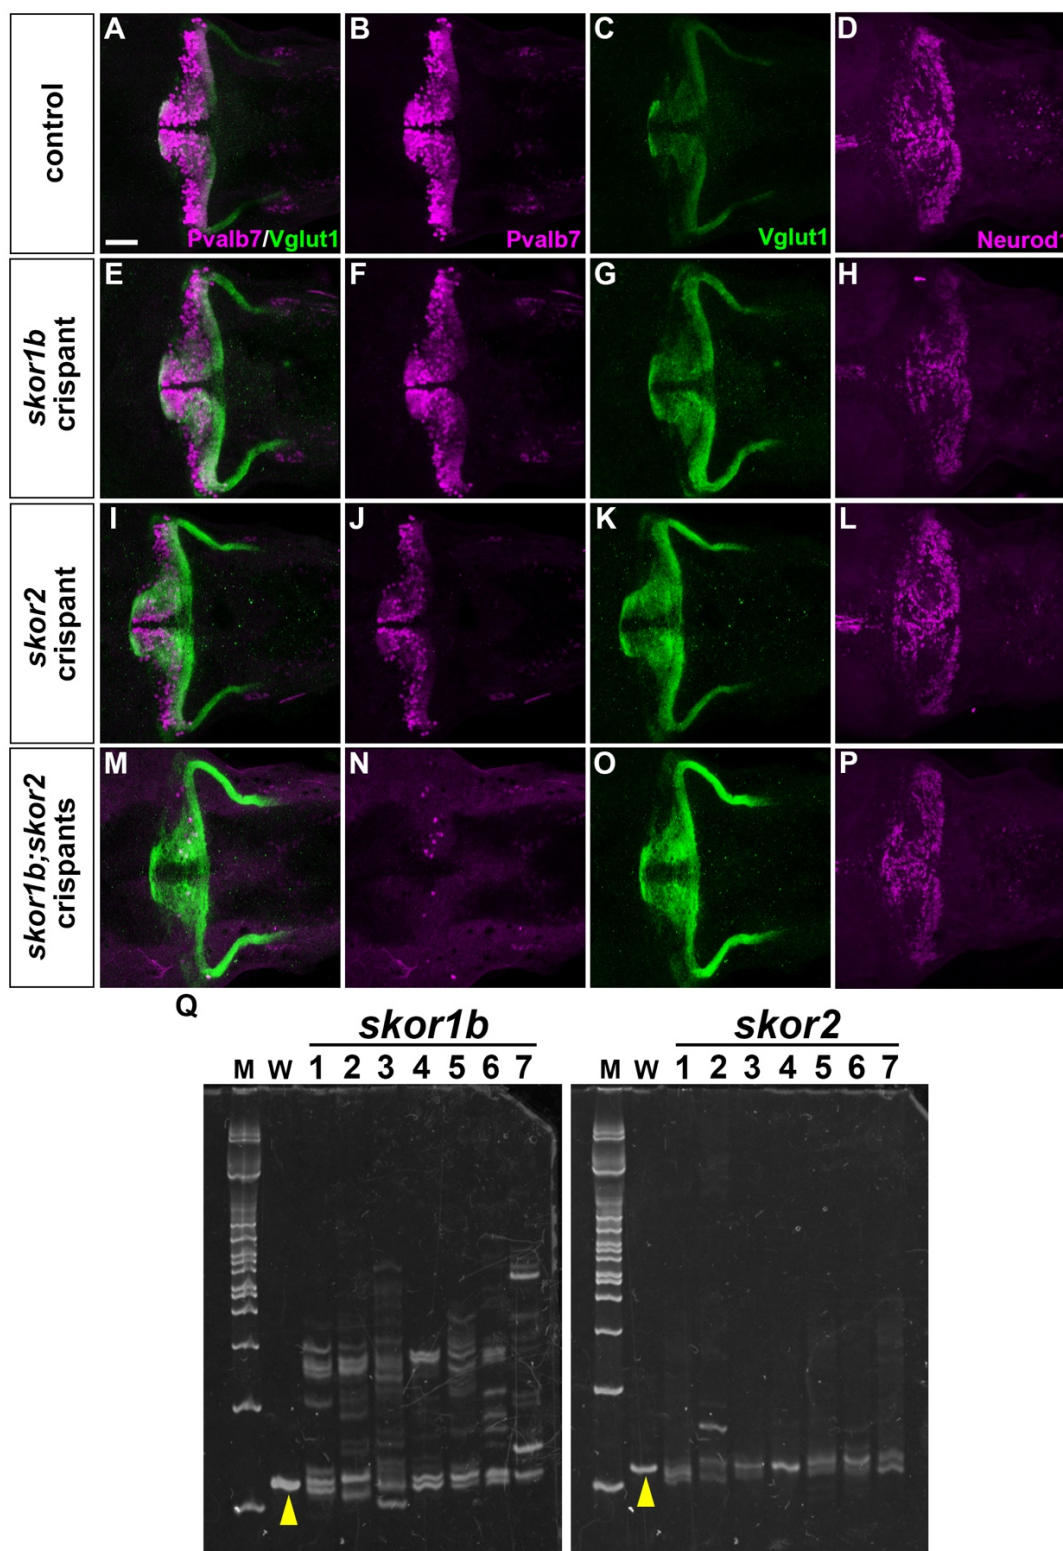

**Fig S10. Phenotypes of *skor1b* and *skor2* crispants.**

(A-C, E-G, I-K, M-O) Expression of PC marker Pvalb7 (magenta) and GC marker Vglut1 (green) in 5-dpf control (n = 5), *skor1b* (n = 5), *skor2* (n = 5), and *skor1b;skor2*

(n = 8) crispants, which received injection of Cas9 protein, tracrRNA, and *skor1b*, *skor2*, or a combination of *skor1b* and *skor2* crRNAs. (D, H, L, P) Expression of GC marker Neurod1 in 5-dpf control (n = 5) and *skor1b* (n = 5), *skor2* (n = 5), and *skor1b;skor2* (n = 10) crispants. Note that while expression of Pvalb7 was not affected in *skor1b* or *skor2* crispants, it was strongly reduced or absent in *skor1b;skor2* crispants. Neurod1 expression was not affected in all the crispants. Dorsal views with anterior to the left. Scale bars: 50 µm in A (applies to A-P). (M) Genotyping of *skor1b* and *skor2* crispants. CRISPR/Cas9-target genomic regions were amplified from seven 5-dpf *skor1b;skor2* crispants by PCR and separated on an acrylamide gel. Note that the crispant larvae had various in/del mutations in their target DNA. Yellow arrows indicated wild-type control PCR products.

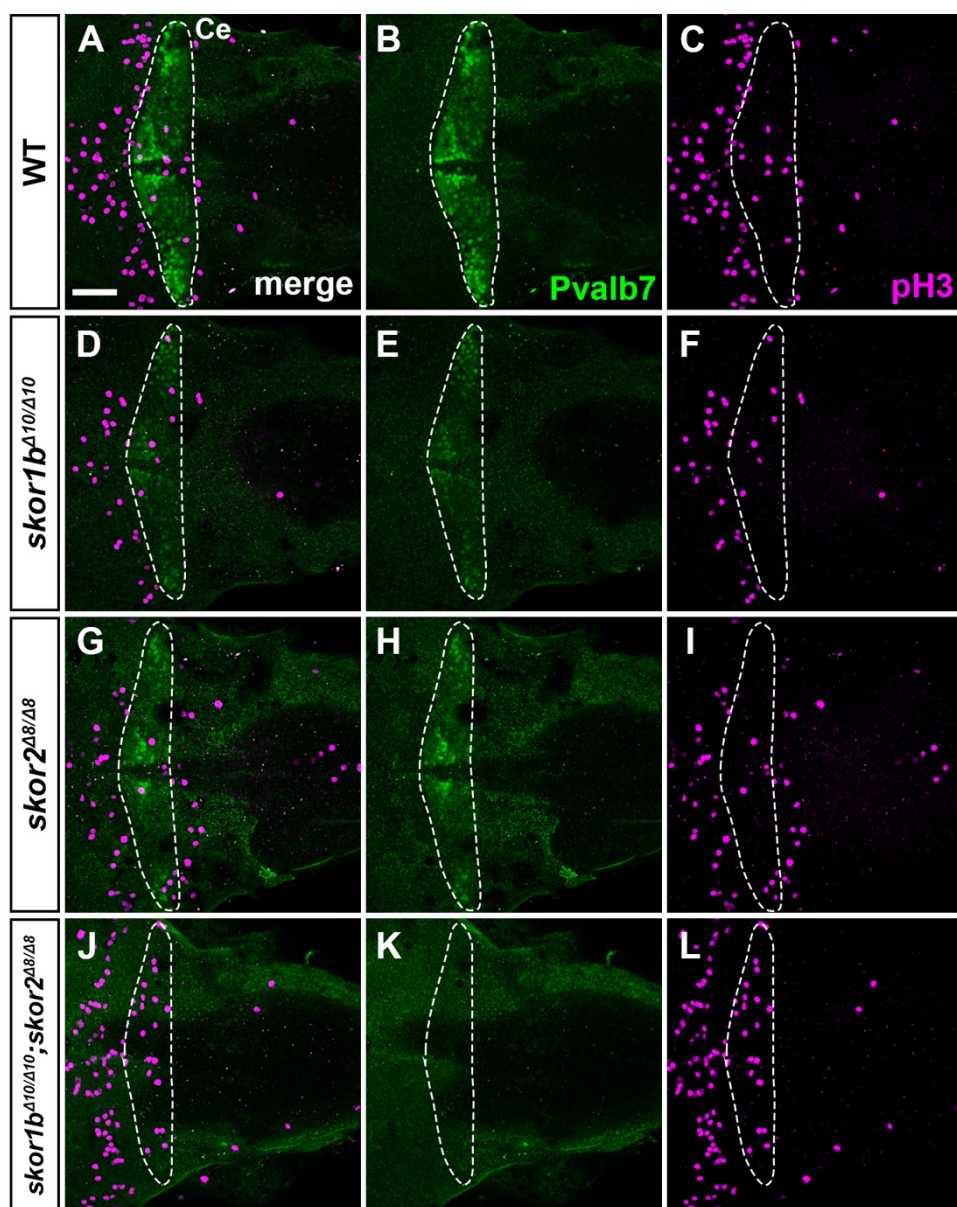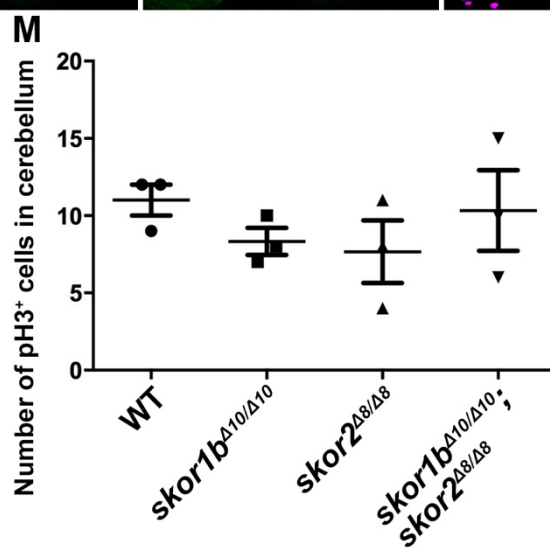

**Fig. S11. Proliferation in wild-type (WT), *skor1b*, *skor2*, and *skor1b/2* mutant cerebellum.**

5 dpf WT (A-C), *skor1b* (D-F), *skor2* (G-I), and *skor1b;skor2* (J-L) mutant larvae were immunostained with anti-Pvalb7 and anti-phospho histone H3 (pH3) antibodies. Three larvae for each genotype were analyzed. Dorsal views with anterior to the left. The cerebellum region (Ce) is surrounded by a dotted line. Scale bar: 50  $\mu$ m in A (applies to A-L). (M) pH3-positive cells in the cerebellum. There was no significant difference between WT, *skor1b*, *skor2*, and *skor1b/2* mutants (one-way ANOVA with Tukey's multiple comparison test).



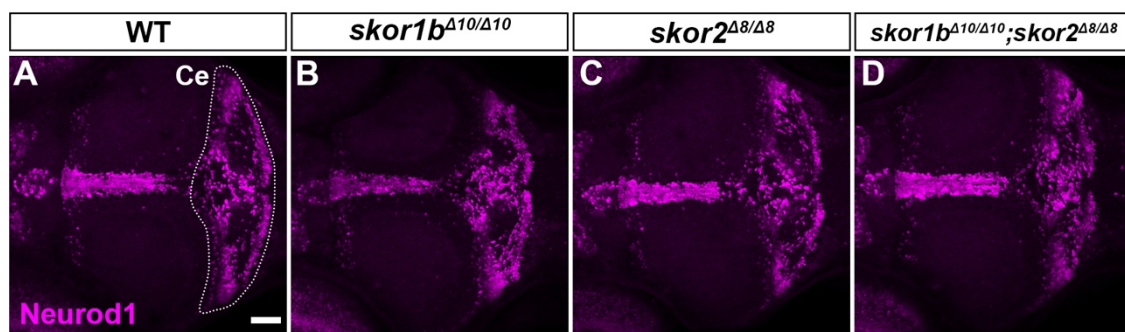

**Fig. S12. Neurod1-expressing GCs in *skor1b*, *skor2*, and *skor1b;skor2* mutants.**

Expression of Neurod1 in the TL and cerebellum of 7-dpf WT ( $n = 5$ ), *skor1b* ( $n = 4$ ), *skor2* ( $n = 5$ ), and *skor1b;skor2* ( $n = 5$ ) mutant larvae. Dorsal views with anterior to the left. The cerebellum region is surrounded by a dotted line. Scale bar: 50  $\mu$ m in A (applies to all panels).

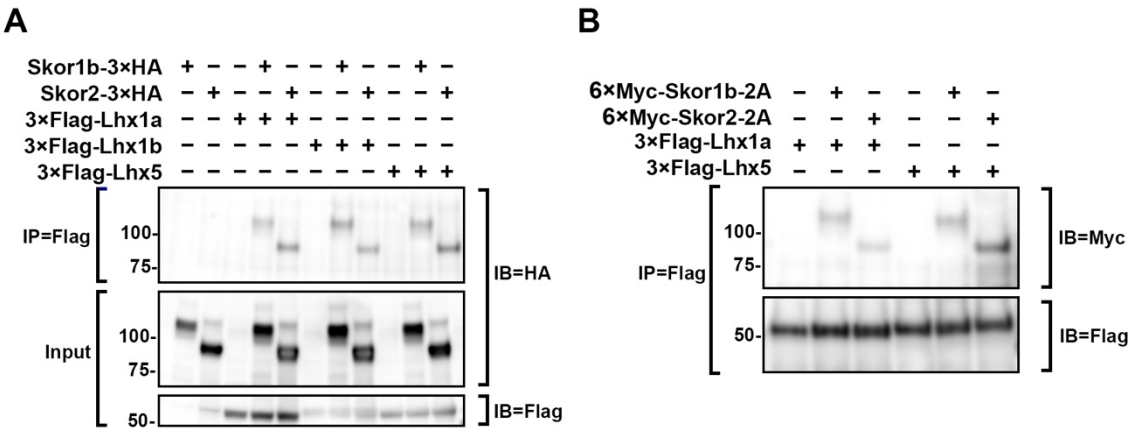

**Fig. S13. Interaction of Skor-family proteins with Lhx1-family proteins.**  
HEK293T cells were transiently transfected with expression plasmids of HA- (A) or Myc (B) epitope-tagged Skor1b, Skor2, and Flag-tagged Lhx1a, Lhx1b, or Lhx5 in the indicated combination. Cell lysates were immunoprecipitated with anti-Flag antibody. Immunoprecipitates or 1/25 of input cell lysates (Input) were immunoblotted with anti-HA, anti-Myc, or anti-Flag antibodies.



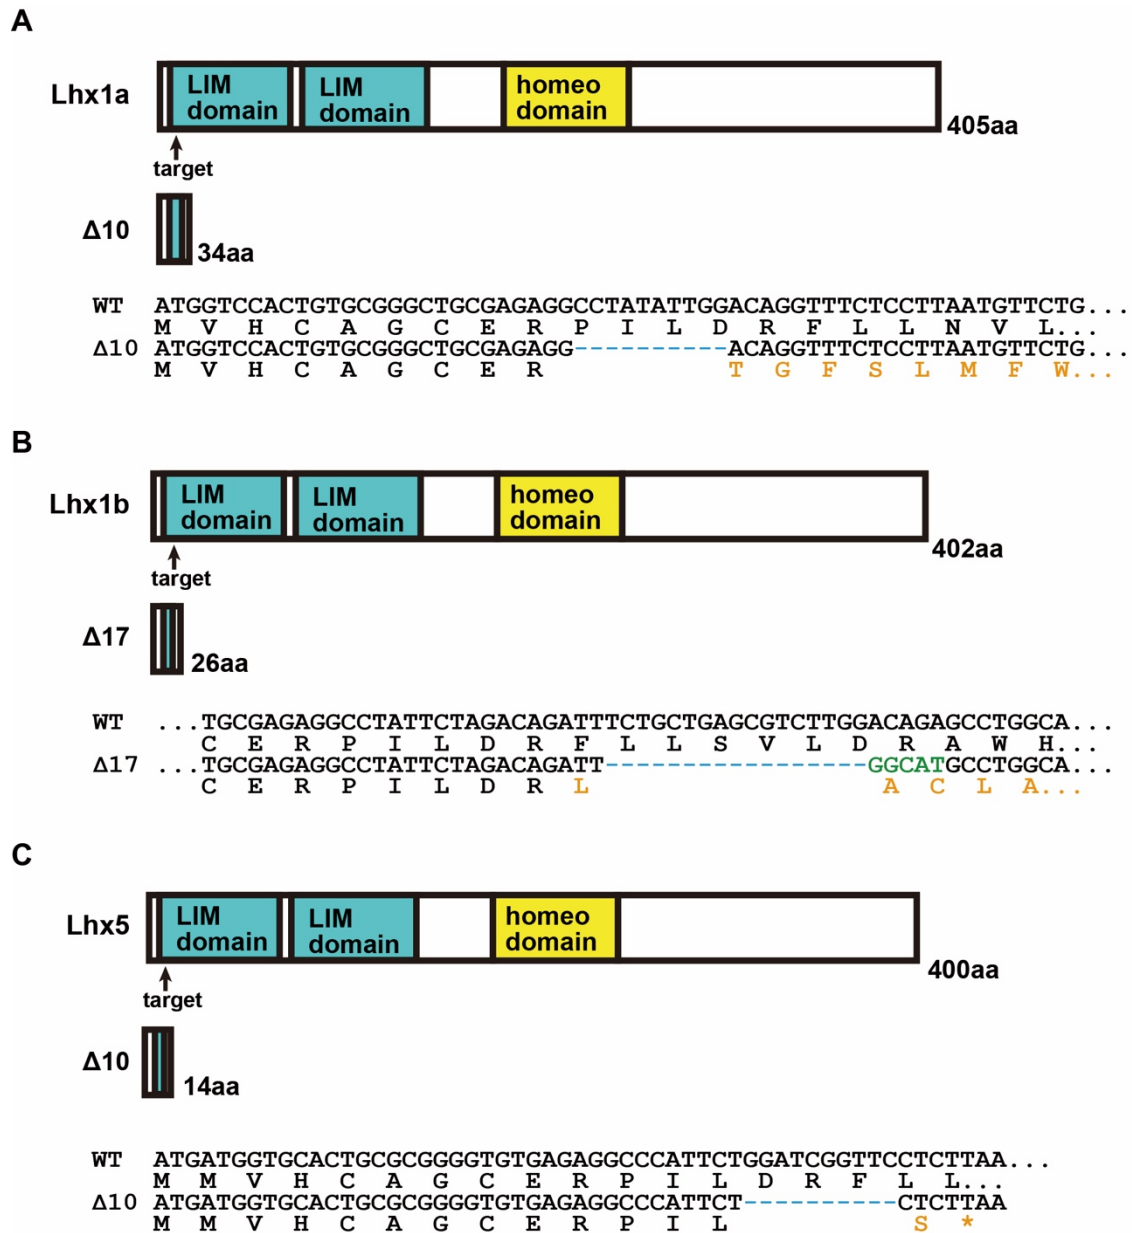

**Fig. S14. Structure of wild-type (WT) and mutant Lhx1a, Lhx1b, and Lhx5.**

Structure of WT and mutant Lhx1a (A), Lhx1b (B), and Lhx5 (C) and nature of mutations generated by the CRISPR/Cas9 method. The positions of the CRISPR/Cas9 targets are shown. The insertion and deletion are marked in green and blue, respectively. The deletion mutations in these genes cause a frameshift, the addition of unrelated amino acids (marked in gray), and a premature stop codon. The mutation of *lhx1a*, *lhx1b*, and *lhx5* results in the addition of 25, 12, and 1 unrelated amino acids, respectively (marked in orange). All the putative mutant proteins lack the LIM domains and the homeodomain that are conserved among Lhx-family proteins.

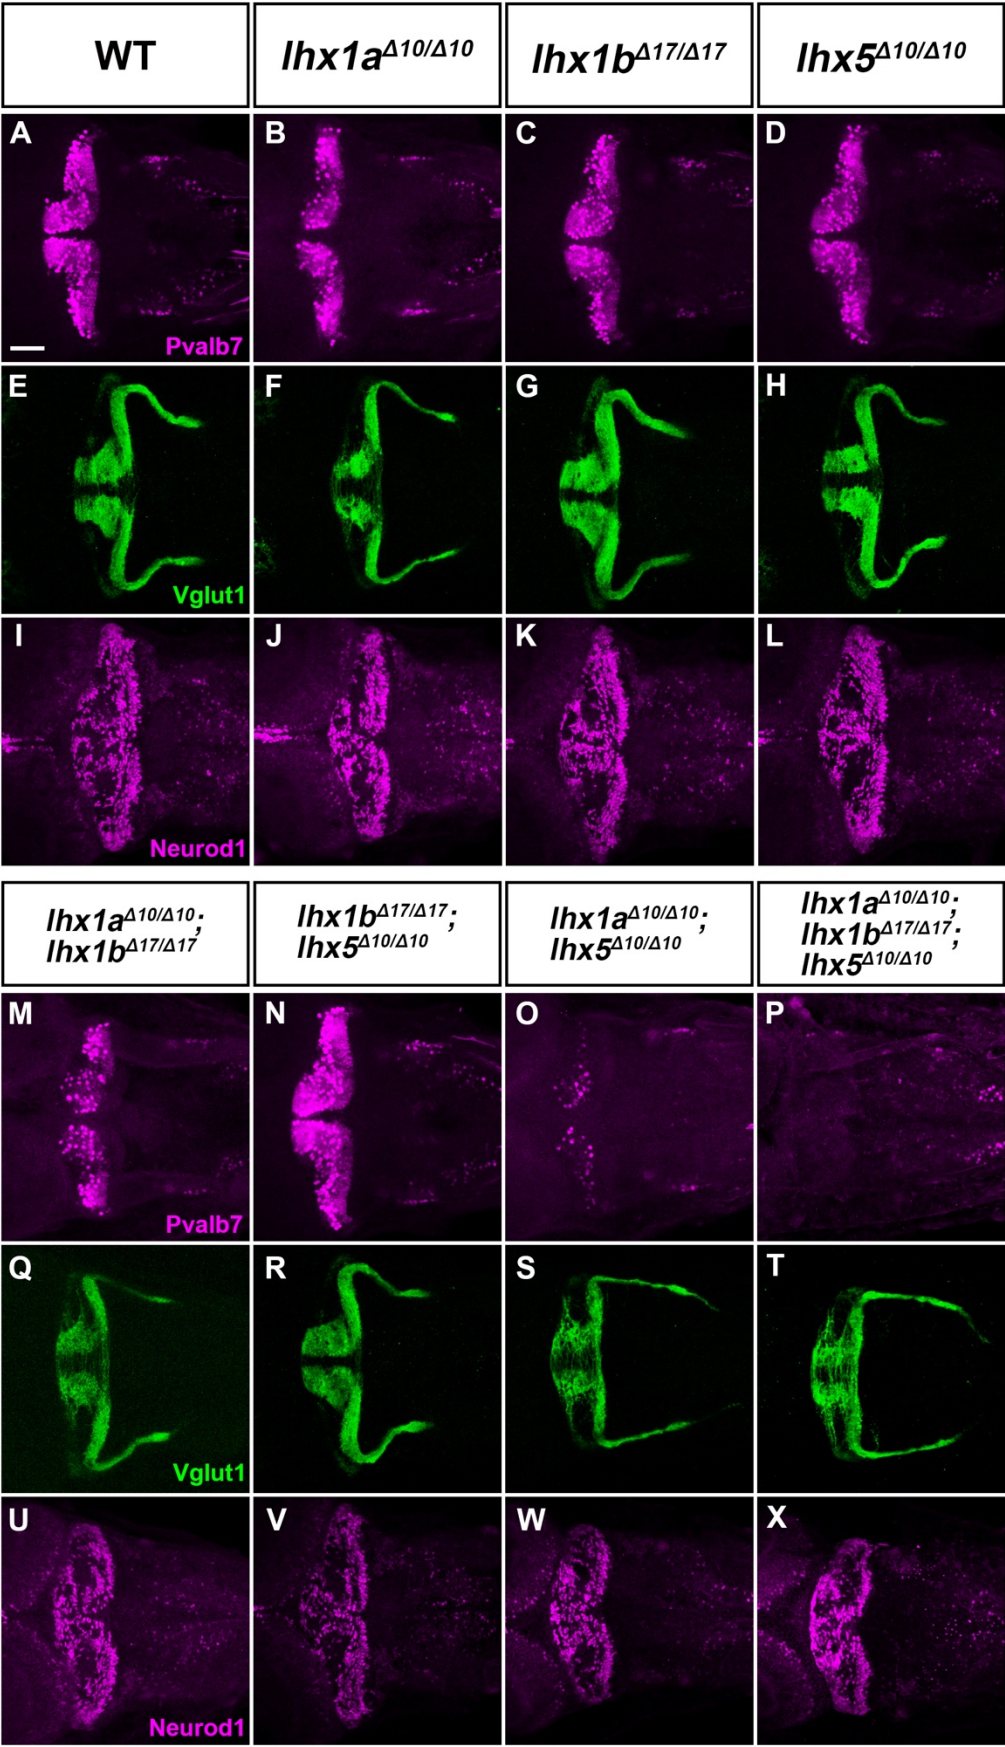

**Fig. S15. Phenotypes of *lhx1a/1b/5* mutants.**

5-dpf wild-type (WT) and *lhx1a/1b/5* combinatory mutants were immuno-stained with anti-Pvalb7 (A-D, M-P), Vglut1 (E-H, Q-T), and Neurod1 (I-L, U-X) antibodies. Dorsal views with anterior to the left. The number of examined larvae and larvae showing each expression pattern is shown in Table S1. Note that expression of Pvalb7 was strongly reduced in the *lhx1a;lhx5* mutant and absent in *lhx1a;lhx1b;lhx5* mutants. In the *lhx1a;lhx5* and *lhx1a;lhx1b;lhx5* mutants, Vglut1 and Neurod1 expression was maintained, but the expression regions were also affected, possibly due to malformation of the larval structure. Scale bar: 50  $\mu$ m in A (applies to all panels).



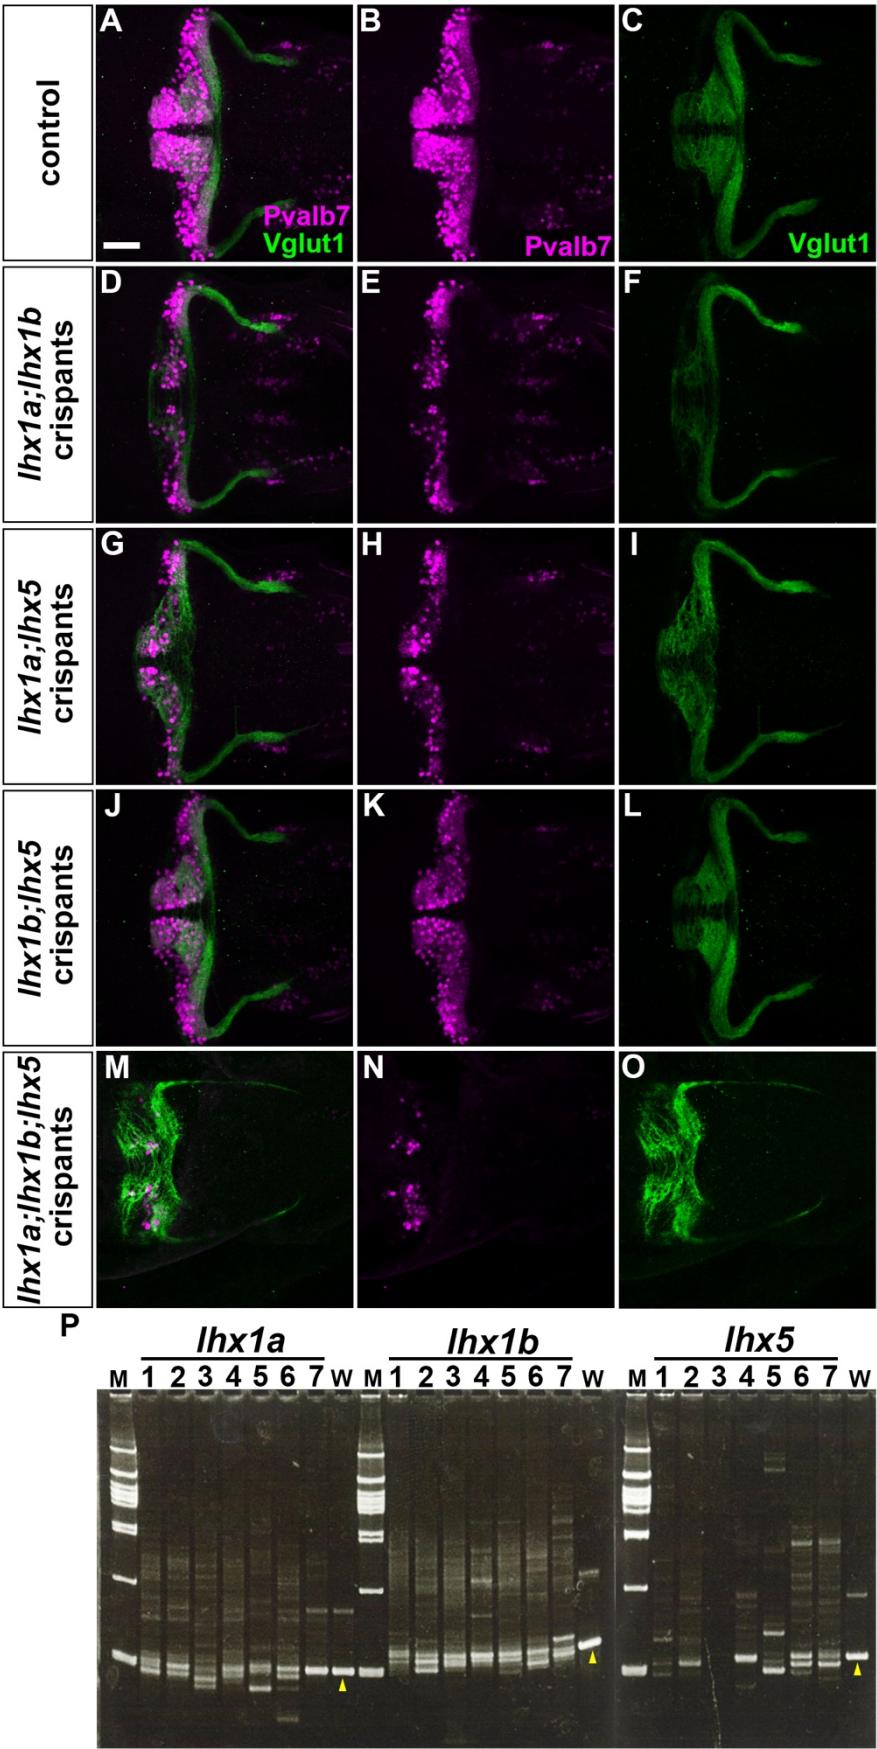

**Fig. S16. Phenotypes of *lhx1a*, *lhx1b* and *lhx5* crispant larvae.**

(A -O) Expression of PC marker Pvalb7 (magenta) and GC marker Vglut1 (green) in 5-dpf control (n = 18), *lhx1a;lhx1b* (n = 5), *lhx1a;lhx5* (n = 5), *lhx1b;lhx5* (n = 5), and *lhx1a;lhx1b;lhx5* (n = 13) crispants. Note that expression of Pvalb7 was slightly reduced in *lhx1a;lhx1b* and *lhx1a;lhx5*, but was markedly reduced or absent in *lhx1a;lhx1b;lhx5* crispants. Dorsal views with anterior to the left. Scale bars: 50  $\mu$ m in A (applies to A-P). (P) Genotyping of *lhx1a*, *lhx1b* and *lhx5* crispants. CRISPR/Cas9-target genomic regions were amplified from seven 1-dpf *lhx1a*, *lhx1b* and *lhx5* single crispants by PCR and separated on an acrylamide gel. Note that crispant larvae had various in/del mutations in their target DNA. Yellow arrows indicated wild-type control PCR products.

**Table S1.** Phenotypes of *lhx1a*, *lhx1b* and *lhx5* mutants

| Genotype<br>Marker<br>(stage) | WT                     | <i>lhx1a</i> <sup>A10/Δ10</sup> | <i>lhx1b</i> <sup>A17/Δ17</sup> | <i>lhx5</i> <sup>A10/Δ10</sup> | <i>lhx1a</i> <sup>A10/Δ10</sup> ;<br><i>lhx1b</i> <sup>A17/Δ17</sup> | <i>lhx1b</i> <sup>A17/Δ17</sup> ;<br><i>lhx5</i> <sup>A10/Δ10</sup> | <i>lhx1a</i> <sup>A10/Δ10</sup> ;<br><i>lhx5</i> <sup>A10/Δ10</sup> | <i>lhx1a</i> <sup>A10/Δ10</sup> ;<br><i>lhx1b</i> <sup>A17/Δ17</sup> ; <i>lhx5</i> <sup>A10/Δ10</sup> |
|-------------------------------|------------------------|---------------------------------|---------------------------------|--------------------------------|----------------------------------------------------------------------|---------------------------------------------------------------------|---------------------------------------------------------------------|-------------------------------------------------------------------------------------------------------|
| Pvalb7<br>(5 dpf)             | +++<br>( <i>n</i> = 1) | ++<br>( <i>n</i> = 2)           | +++<br>( <i>n</i> = 4)          | +++<br>( <i>n</i> = 4)         | +<br>( <i>n</i> = 2)                                                 | +++<br>( <i>n</i> = 4)                                              | +<br>( <i>n</i> = 4)                                                | -<br>( <i>n</i> = 3)                                                                                  |
| Vglut1<br>(5 dpf)             | +++<br>( <i>n</i> = 1) | ++<br>( <i>n</i> = 3)           | +++<br>( <i>n</i> = 2)          | ++<br>( <i>n</i> = 4)          | ++<br>( <i>n</i> = 2)                                                | +++<br>( <i>n</i> = 3)                                              | +<br>( <i>n</i> = 5)                                                | +<br>( <i>n</i> = 3)                                                                                  |

5-dpf wild-type (WT), *lhx1a*/*lhx1b*/*lhx5* single and compound mutant larvae were fixed and analyzed by immunostaining with anti-Pvalb7 anti-Vglut1. Expression levels are indicated by +++, ++, +, and -. +++ indicates expression comparable to that in WT; ++ indicates weak expression, + indicates strongly reduced expression; - indicates little or no expression. The source data are in Table S2.

**Table S2.** Source data of Table 1, 2, 3, and S1

Available for download at  
<https://journals.biologists.com/dev/article-lookup/doi/10.1242/dev.202546#supplementary-data>
